# Supplementary material
Source: PubMed Central journal article supplement (PMC4260561)
Supplement: pnas.1410083111.sd01.pdf [file pnas.1410083111.sd01.pdf]

**Dataset S1.1(a). List of positively selected genes identified by the two-branch and branch-site tests in the Carnivore lineage**

|         |          |          |         |         |         |         |          |           |        |
|---------|----------|----------|---------|---------|---------|---------|----------|-----------|--------|
| A4GALT  | APH1B    | C9orf123 | CD84    | COX7A1  | DNHD1   | FAM195B | GPRC5A   | IWS1      | LRRC43 |
| AASDH   | APOB     | C9orf89  | CDC26   | CPD     | DOK1    | FAM83C  | GTF3A    | JAK2      | LRRC63 |
| ABCG2   | APOBEC1  | CA14     | CDH16   | CPLX4   | DPH2    | FAN1    | GUCA1B   | JARID2    | LRRK2  |
| ACR     | ARHGAP18 | CABP4    | CDH17   | CRTAP   | DPM2    | FECH    | HAUS8    | KARS      | LSS    |
| ADAM28  | ARHGAP31 | CACNB2   | CDH24   | CTSA    | DQX1    | FGF23   | HEATR2   | KCNJ15    | LTF    |
| ADH4    | ARMC3    | CAPZA3   | CDSN    | CX3CR1  | DSG2    | FGFBP1  | HEPHL1   | KCNK7     | LY6E   |
| ADH4    | ARMCX1   | CARD6    | CECR1   | CXADR   | DYNLRB2 | FMO3    | HJURP    | KCNN4     | LYVE1  |
| AEN     | ATF6     | CATSPER2 | CELA1   | CXCR6   | EDC4    | FN3KRP  | HMGCL    | KCTD3     | MANBA  |
| AGA     | ATP2C2   | CATSPER4 | CEP152  | CXorf30 | EDN1    | FOXRED1 | HOOK1    | KIAA1143  | MANEA  |
| AGFG2   | AXIN1    | CC2D1B   | CEP250  | CYGB    | EIF2B3  | FSD1    | IGLON5   | KIAA1984  | MAP1B  |
| AHSG    | B4GALT4  | CC2D2A   | CHCHD2  | CYP27A1 | EIF3I   | FSD2    | IL1R1    | KLF4      | MARCH8 |
| AKAP1   | BCAS1    | CCBL2    | CHM     | DAG1    | EMR1    | FTO     | IL4I1    | KLHL22    | MARCO  |
| AKAP12  | BCL3     | CCDC108  | CHRM5   | DBNDD2  | ENAH    | GALNT14 | IL7      | KRTAP11-1 | MAT2B  |
| AMPD1   | BLZF1    | CCDC117  | CKAP2L  | DCAF5   | ENOSF1  | GALNT5  | ILF2     | LAMA3     | MBD1   |
| ANGPT2  | BPI      | CCDC137  | CLCC1   | DCDC2B  | ENPP4   | GALT    | IMPG1    | LAX1      | MDM1   |
| ANGPTL2 | BRCA2    | CCDC15   | CLDN8   | DCK     | ENPP7   | GAPDHS  | INPP5A   | LBR       | MED17  |
| ANK3    | BRIP1    | CCDC40   | CMYA5   | DCLRE1B | ERAL1   | GCAT    | INSL6    | LCA5      | MKKS   |
| ANKS1A  | BRWD1    | CCDC67   | CNGB    | DDRGK1  | F10     | GGCT    | IQGAP3   | LCLAT1    | MLH1   |
| ANKS6   | C15orf52 | CCKBR    | CNGB3   | DGCR2   | F5      | GGH     | IRF8     | LETM1     | MMP24  |
| ANPEP   | C18orf32 | CCNF     | COG7    | DHRS9   | FAM101B | GLB1    | ITGA8    | LGR6      | MORN1  |
| ANXA1   | C18orf54 | CCR6     | COL15A1 | DIAPH3  | FAM111B | GLB1L   | ITGAM    | LPXN      | MRPL2  |
| ANXA13  | C2orf62  | CCR8     | COL23A1 | DIRAS1  | FAM129B | GOLM1   | ITGB1BP2 | LRP2      | MRPL28 |
| ANXA5   | C4orf47  | CD47     | COL6A1  | DLEC1   | FAM149A | GPR111  | ITGB2    | LRRC15    | MRPL41 |
| ANXA7   | C9       | CD63     | COL9A3  | DNAJC12 | FAM188B | GPR179  | ITPR2    | LRRC32    | MRPL51 |

**Dataset S1.1(b). List of positively selected genes identified by the two-branch and branch-site tests in the Carnivore lineage**

|         |        |         |           |          |          |         |           |         |         |
|---------|--------|---------|-----------|----------|----------|---------|-----------|---------|---------|
| MRPS12  | NMI    | PDE4C   | PPP1R3A   | RELL2    | SHARPIN  | SNAPC4  | THADA     | TP53BP1 | VRK2    |
| MSMP    | NODAL  | PDE6B   | PRC1      | RGS4     | SHC4     | SNAPC5  | THBS3     | TPX2    | WFDC11  |
| MSR1    | NOL7   | PDILT   | PRF1      | RHBDD1   | SIGIRR   | SNCAIP  | THSD1     | TRA2A   | YIPF3   |
| MUM1L1  | NOV    | PEX6    | PRICKLE2  | RHCG     | SKAP2    | SNRNP25 | TK2       | TRAF7   | ZC3HAV1 |
| MUTYH   | NSD1   | PGLYRP1 | PSD3      | RHEBL1   | SLC10A4  | SOAT1   | TLR2      | TRDMT1  | ZMYM3   |
| MYD88   | NSUN5  | PGM2    | PSMD6     | RHOT2    | SLC12A4  | SOCS6   | TLR4      | TREM2   | ZNF331  |
| MYH8    | NUP153 | PHF15   | PTCD2     | ROS1     | SLC13A2  | SPATA7  | TLR6      | TRIM25  | ZNF398  |
| MYO15A  | OAZ3   | PIBF1   | PTGR1     | RRAGD    | SLC15A1  | SPTA1   | TLR8      | TRIM33  | ZNF473  |
| MYO3B   | OAZ3   | PIGQ    | PTPRC     | RRS1     | SLC16A5  | SRGN    | TMCO6     | TSEN2   | ZNF687  |
| MYO7A   | OBFC1  | PIK3CB  | PTPRH     | RSPO4    | SLC22A23 | SS18L1  | TMEM109   | TSHZ2   | ZNF777  |
| NANOS3  | OIT3   | PITPNA  | PXN       | RTBDN    | SLC22A8  | ST3GAL1 | TMEM116   | TSPAN10 | ZSWIM5  |
| NBEAL1  | OLFM1  | PITX1   | PYCARD    | RTN4     | SLC25A23 | STK24   | TMEM150B  | TSPYL4  |         |
| NDOR1   | OR10V1 | PKHD1   | QSER1     | RTP3     | SLC25A42 | SUCLG1  | TMEM156   | TTC34   |         |
| NDST3   | OR13H1 | PKMYT1  | RAB11FIP5 | SCGB1C1  | SLC29A2  | TAL2    | TMEM167B  | TTF2    |         |
| NDUFA6  | OSGEP  | PLA2G2F | RAB18     | SCML2    | SLC2A10  | TAS2R38 | TMEM176A  | TUBGCP3 |         |
| NDUFAF4 | OSMR   | PLBD1   | RAB19     | SCN3B    | SLC44A4  | TBC1D21 | TMEM182   | UBA7    |         |
| NDUFV2  | OTOF   | POC1B   | RAD52     | SCNM1    | SLC47A1  | TBL3    | TMEM215   | UBE2L6  |         |
| NFAM1   | OTUB2  | PPA2    | RAG1      | SDR39U1  | SLC4A1   | TBXAS1  | TMIGD1    | UGT2A3  |         |
| NGLY1   | OVCA2  | PPEF1   | RANGAP1   | SEC61A2  | SLC4A5   | TCN2    | TMOD1     | UMOD    |         |
| NGRN    | OXCT1  | PPID    | RASAL1    | SEL1L2   | SLC6A4   | TEP1    | TMX1      | UNC13D  |         |
| NID1    | PADI2  | PPL     | RASSF5    | SELP     | SLC7A1   | TFAM    | TNFRSF13B | UPRT    |         |
| NIN     | PCDH12 | PPM1E   | RCSL1     | SEPT12   | SLC7A4   | TFB2M   | TNKS1BP1  | UTP11L  |         |
| NKTR    | PCNXL2 | PPM1K   | RECQL4    | SERPINB9 | SLCO1C1  | TG      | TOM1      | VAMP8   |         |
| NLRP14  | PDCL3  | PPP1R2  | REEP1     | SH2D2A   | SMPDL3B  | TGM6    | TOX4      | VPS13C  |         |

**Dataset S1.2(a). List of positively selected genes identified by the two-branch and branch-site tests in the Felidae lineage**

|         |            |          |           |          |          |         |          |          |         |
|---------|------------|----------|-----------|----------|----------|---------|----------|----------|---------|
| ABCA5   | BAK1       | C5       | CHRD      | DNAJB4   | GMIP     | IPO7    | LRRC14B  | N4BP2    | PRX     |
| ACADL   | BBS7       | CA4      | CLEC5A    | DNHD1    | GPA33    | IQCH    | LRRC6    | NIF3L1   | PSMB8   |
| ACCS    | BBS9       | CALML5   | CLUL1     | DUSP2    | GPAA1    | IRF8    | LRRTM2   | NOLC1    | PSME3   |
| ACSF3   | BCAT2      | CAPN13   | CMTM2     | DYSF     | GPRIN3   | IRS4    | LTA4H    | NPNT     | PSMG3   |
| ADAM22  | BCL2L14    | CATSPER3 | CMYA5     | E2F7     | GRIA2    | ISG15   | LY9      | NPY      | PTPRC   |
| ADC     | BCL2L15    | CCDC107  | CNKSR1    | ECM2     | GRIA2    | ITGAE   | MAMDC2   | NPY1R    | PTPRH   |
| AHSP    | BIN1       | CCDC112  | CRTAM     | EFCAB2   | GRIN2C   | ITGB7   | MAP7D3   | NTRK1    | PTPRN   |
| AIM1L   | BIRC3      | CCDC113  | CST7      | EHBP1L1  | GSDMC    | ITIH4   | MAPK8IP2 | NUBP2    | PTPRQ   |
| AKAP9   | BMF        | CCDC150  | CTSZ      | EHHADH   | GTPBP8   | ITPR3   | MAPKBP1  | NUDCD3   | RAB20   |
| AKNA    | BMP15      | CCNE2    | CTTNBP2NL | EPHX1    | GUCA1A   | KIF1A   | MCM7     | NUDT22   | RASGRP1 |
| AKNAD1  | BMPR2      | CD200    | CXorf23   | FA2H     | HAUS5    | KREMEN2 | MECR     | OAZ3     | RBM28   |
| ALB     | BPI        | CD244    | CXorf57   | FAIM3    | HCFC2    | L1CAM   | MEIS1    | OMA1     | RELA    |
| ALDH1A2 | BRD7       | CD274    | CYP17A1   | FAM161B  | HDGF     | LARS2   | MKNK2    | OOEP     | RIBC1   |
| ALG3    | BRIP1      | CD48     | CYP1A2    | FAM181A  | HFM1     | LAT2    | MORN3    | PARP2    | RNF141  |
| ALPK2   | BRWD1      | CD8B     | DCST2     | FBN3     | HHIPL2   | LAX1    | MRPL50   | PC       | RNF217  |
| ANGPT2  | C10orf137  | CD97     | DDO       | FIGF     | HSD17B14 | LCNL1   | MRPL55   | PFN2     | RNPEP   |
| ANKS4B  | C12orf56   | CDC25B   | DDX49     | FKBP3    | HSPBP1   | LGALS2  | MSGN1    | PIK3C2G  | ROS1    |
| ANPEP   | C14orf166B | CDH1     | DEPDC1    | FKBP4    | IFNK     | LIMS2   | MTRR     | PLAC8L1  | RPUSD4  |
| AP3B2   | C17orf64   | CDH17    | DEPDC7    | FKBP7    | IGF1     | LIN28B  | MUTYH    | PNLIP    | RSPH6A  |
| ARF4    | C1orf146   | CDH5     | DHRS1     | GAP43    | IGFBP5   | LMBRD2  | MVK      | PPAPDC1A | S100A12 |
| ARMCX2  | C1orf194   | CDKN1B   | DHX32     | GGA3     | IL17RB   | LMF1    | MYH8     | PPP1R13L | SACS    |
| ATE1    | C1QB       | CEACAM18 | DLGAP5    | GJA10    | IL22     | LONRF3  | MYO15A   | PRF1     | SCAMP2  |
| ATP2B3  | C2orf43    | CENPE    | DMP1      | GJA5     | INHBB    | LPAR5   | MYO1F    | PROM1    | SCAP    |
| AZGP1   | C3orf62    | CES2     | DNAH8     | GLIPR1L2 | INVS     | LRAT    | MYO7A    | PRRG3    | SCD5    |

**Dataset S1.2(b). List of positively selected genes identified by the two-branch and branch-site tests in the Felidae lineage**

|         |         |         |         |          |          |        |         |         |        |
|---------|---------|---------|---------|----------|----------|--------|---------|---------|--------|
| SCG2    | SLC16A5 | SNCG    | STARD13 | TDG      | TMEM176A | TRAT1  | UBE2S   | WRN     | ZSWIM2 |
| SCGB1A1 | SLC1A7  | SNRNP70 | STARD3  | TEX11    | TMEM19   | TRMU   | UCHL1   | XKR7    |        |
| SDC2    | SLC27A1 | SPATA7  | STK31   | TFAP2A   | TMEM190  | TRPM4  | UMPS    | XRCC5   |        |
| SELL    | SLC2A4  | SPEF2   | STOX1   | TGM7     | TMEM211  | TRPS1  | UNC93B1 | YIF1B   |        |
| SERHL2  | SLC38A8 | SPHK1   | SVEP1   | THTPA    | TMX3     | TSPAN8 | USHBP1  | ZFYVE16 |        |
| SF3A2   | SLC43A3 | SPTBN4  | SYDE2   | TM6SF2   | TNFAIP3  | TSSK4  | VTI1A   | ZNF304  |        |
| SFTPB   | SLC7A11 | SPTBN5  | SYNM    | TMEM140  | TNIP2    | TTC34  | WDFY4   | ZNF408  |        |
| SH2D2A  | SLCO2B1 | SPTLC3  | SYTL3   | TMEM150B | TNIP3    | TTC39C | WFDC8   | ZNF780B |        |
| SIPA1L2 | SMOC2   | SRCRB4D | TAPBPL  | TMEM156  | TRA2A    | TTYH1  | WHAMM   | ZNF804B |        |
| SIT1    | SNAPC3  | STAM    | TCF3    | TMEM161B | TRAF3IP2 | TUSC5  | WIPF2   | ZSCAN29 |        |

**Dataset S1.3(a). List of positively selected genes identified by the two-branch and branch-site tests in the Felinae lineage**

|          |          |         |         |          |          |         |          |         |          |
|----------|----------|---------|---------|----------|----------|---------|----------|---------|----------|
| ABHD1    | BRAF     | CENPM   | ENKUR   | GPR174   | ITGA9    | MIIP    | OR2B11   | PSPH    | SERINC3  |
| ACOT11   | BRCA1    | CEP68   | ENTPD7  | GPRASP2  | ITGBL1   | MORC1   | OR4D6    | PSTK    | SH2D5    |
| ACOT13   | C11orf54 | CEP97   | EPHB4   | GPRC5A   | ITPR3    | MRPL11  | OTOF     | PTPRR   | SHC4     |
| ACOT8    | C11orf63 | CHMP4B  | ETV4    | GPRIN2   | JMJD1C   | MRPL52  | PAFAH2   | PTPRS   | SIAE     |
| ACOX2    | C16orf71 | CIB4    | FAIM3   | GRHL3    | KIAA0226 | MTIF2   | PARVG    | PUSL1   | SLC22A13 |
| ACOX3    | C1orf109 | CLDN17  | FAM131B | GRIA2    | KIF1C    | MTRF1   | PCDHB4   | RABL3   | SLC22A18 |
| ADAMDEC1 | C22orf31 | CLEC5A  | FAM179A | HADH     | KIF22    | MURC    | PHLDB3   | RBM11   | SLC25A38 |
| ADAMTS13 | C2orf40  | CNGA2   | FAM69A  | HEATR5B  | KIF27    | MVK     | PITRM1   | RBP5    | SLC35F5  |
| ADAMTSL3 | C2orf62  | COL6A3  | FANCB   | HECA     | KIRREL2  | MYLK3   | PJA2     | RCSD1   | SLC39A7  |
| AK1      | C3orf62  | COL9A3  | FAT4    | HEPACAM2 | KRIT1    | MYO15A  | PLA2G2E  | RELL1   | SLC39A8  |
| ALDH16A1 | C8B      | CROCC   | FBN3    | HEPH     | KYNU     | MYO9A   | PLA2G3   | RHBDD1  | SLC46A1  |
| ALS2CR12 | C9orf96  | CSPP1   | FBXL22  | HMMR     | LAMC2    | NAPRT1  | PLAC1    | RIMKLA  | SLCO1A2  |
| AMACR    | CAGE1    | CTTN    | FBXO28  | HPS5     | LAP3     | NEK1    | PLAC8L1  | RNASE6  | SMG1     |
| ANKRD2   | CASP7    | CYB5R1  | FER     | HSD3B7   | LATS2    | NEK4    | PLIN3    | RNPC3   | SMG6     |
| ANKRD49  | CBX2     | CYP27B1 | FGA     | HSPA13   | LCAT     | NFAM1   | PML      | RSL1D1  | SPATA21  |
| ANKRD50  | CCDC38   | DACT1   | FN3K    | IFT81    | LIAS     | NFKBIZ  | PPAP2A   | RTP3    | SPATA7   |
| APEH     | CCDC64B  | DAPK1   | FRMD7   | IGHMBP2  | LIMD1    | NOLC1   | PPAPDC1B | S100A12 | SPERT    |
| APOBEC4  | CCDC70   | DNAJB9  | GCNT7   | INHBC    | LRRC32   | NOSTRIN | PPFIBP1  | SCN9A   | SPHKAP   |
| ARHGAP26 | CD27     | DNTTIP2 | GEMIN7  | INPP4B   | LRRC36   | NOTCH2  | PPP1R13B | SCRIB   | SPINT1   |
| ASB11    | CD48     | DPEP3   | GGT6    | INPP5J   | LSM3     | NPFFR2  | PRICKLE4 | SDK2    | SPTBN5   |
| ATXN7L1  | CD93     | DUSP19  | GOLGA1  | IPO4     | MAP7D2   | NRG2    | PRKAG1   | SEC24A  | SREBF1   |
| BARD1    | CDH6     | ECHDC1  | GPATCH8 | IQCB1    | MARVELD3 | NUDT15  | PRKG2    | SEN5    | SRRM2    |
| BCAP31   | CELA1    | EDC3    | GPR133  | ISG15    | MERTK    | OPTC    | PRR11    | SEN7    | STARD5   |
| BPI      | CENPE    | EHBP1L1 | GPR15   | ITGA2B   | METTL8   | OR10K1  | PRX      | SEPT10  | STK11IP  |

**Dataset S1.3(b). List of positively selected genes identified by the two-branch and branch-site tests in the Felinae lineage**

|       |        |         |        |        |       |         |         |       |
|-------|--------|---------|--------|--------|-------|---------|---------|-------|
| STS   | TAS2R1 | THUMPD1 | TRPV6  | UBXN10 | WDR62 | WWC1    | ZMYND10 | ZZEF1 |
| SUN3  | TAS2R3 | TMEM59L | TSTD2  | USP45  | WDR90 | XCR1    | ZNF436  |       |
| SURF2 | TEX14  | TMEM71  | TXN2   | UVRAG  | WFDC8 | XPC     | ZNF555  |       |
| SYNM  | TF     | TOE1    | TXNRD2 | VEZT   | WIPF2 | ZFAT    | ZNF622  |       |
| SYTL1 | THBS2  | TP53BP1 | TYK2   | WDR17  | WIPF3 | ZFYVE19 | ZNF780B |       |

**Dataset S1.4(a). Predicted structural/functional influence of the domestic cat nonsynonymous substitutions for positively selected sensory and lipid metabolism genes**

| Gene Name     | Number of Significant Amino Acid Properties | Identified Categories                    | Intense Protein Functional Changes | Number of Suggested Deleterious Amino Acid Substitutions |
|---------------|---------------------------------------------|------------------------------------------|------------------------------------|----------------------------------------------------------|
| ABHD1         | 2                                           | 9,22                                     | negative                           | 0                                                        |
| ACOT11        | 3                                           | 12,17,26                                 | negative                           | 0                                                        |
| ACOT8         | 1                                           | 9                                        | negative                           | 0                                                        |
| ACOX2         | 5                                           | 7,10,12,15,31                            | negative                           | 0                                                        |
| <b>ACOX3</b>  | <b>6</b>                                    | <b>4,10,12,15,17,21</b>                  | <b>positive</b>                    | <b>2</b>                                                 |
| <b>AMACR</b>  | <b>5</b>                                    | <b>10,17,24,30,31</b>                    | <b>positive</b>                    | <b>4</b>                                                 |
| BARD1         | 2                                           | 9,12                                     | negative                           | 0                                                        |
| BBS7          | 0                                           |                                          | negative                           | 0                                                        |
| BBS9          | 2                                           | 3,7                                      | negative                           | 0                                                        |
| <b>BRAF</b>   | <b>2</b>                                    | <b>9,22</b>                              | <b>positive</b>                    | <b>1</b>                                                 |
| <b>BRCA1</b>  | <b>28</b>                                   | <b>1-9,11-15,17-26,28-31</b>             | <b>positive</b>                    | <b>11</b>                                                |
| <b>CA4</b>    | <b>2</b>                                    | <b>13,27</b>                             | <b>positive</b>                    | <b>1</b>                                                 |
| CABP4         | 0                                           |                                          | negative                           | 0                                                        |
| CDKN1B        | 0                                           |                                          | negative                           | 0                                                        |
| CHM           | 4                                           | 1,4,11,12                                | negative                           | 0                                                        |
| <b>CNGA2</b>  | <b>2</b>                                    | <b>10,15</b>                             | <b>positive</b>                    | <b>1</b>                                                 |
| <b>CNGB3</b>  | <b>1</b>                                    | <b>31</b>                                | <b>positive</b>                    | <b>1</b>                                                 |
| <b>COL6A3</b> | <b>31</b>                                   | <b>1-31</b>                              | <b>positive</b>                    | <b>1</b>                                                 |
| <b>COL9A3</b> | <b>4</b>                                    | <b>13,15,17,31</b>                       | <b>positive</b>                    | <b>1</b>                                                 |
| CPLX4         | 0                                           |                                          | negative                           | 0                                                        |
| CYP27B1       | 1                                           | 17                                       | negative                           | 0                                                        |
| GJA10         | 0                                           |                                          | positive                           | 1                                                        |
| <b>GRIA2</b>  | <b>1</b>                                    | <b>2</b>                                 | <b>positive</b>                    | <b>2</b>                                                 |
| GRIN2C        | 2                                           | 9,17                                     | negative                           | 0                                                        |
| GUCA1A        | 0                                           |                                          | negative                           | 0                                                        |
| GUCA1B        | 0                                           |                                          | negative                           | 0                                                        |
| HADH          | 1                                           | 28                                       | negative                           | 0                                                        |
| <b>HMMR</b>   | <b>5</b>                                    | <b>1,7,9,15,17</b>                       | <b>positive</b>                    | <b>2</b>                                                 |
| HSD3B7        | 2                                           | 9,15                                     | negative                           | 0                                                        |
| IMPG1         | 0                                           |                                          | negative                           | 0                                                        |
| INPP5J        | 4                                           | 1,2,4,12                                 | negative                           | 0                                                        |
| IQCB1         | 2                                           | 15,22                                    | negative                           | 0                                                        |
| ITGA2B        | 14                                          | 3,6,7,8,10,12,16,17,19,22,24,28,29,31    | negative                           | 0                                                        |
| ITGA9         | 3                                           | 1,3,15                                   | negative                           | 0                                                        |
| <b>LAMC2</b>  | <b>14</b>                                   | <b>3,7-10,12,13,15,16,17,19,26,29,31</b> | <b>positive</b>                    | <b>1</b>                                                 |
| LCAT          | 0                                           |                                          | negative                           | 0                                                        |
| LRAT          | 0                                           |                                          | negative                           | 0                                                        |

Significant genes common to both approaches are highlighted in red.

a- TreeSAAP is used to measure structural and biochemical properties of amino acid replacement using a threshold of P<0.001. 31 categories are tested as follows: 1. Alpha-helical tendencies, 2. Average number of surrounding residues, 3. Beta-structure tendencies, 4. Bulkiness, 5. Buriedness, 6. Chromatographic index, 7. Coil tendencies, 8. Composition, 9. Compressibility, 10. Equilibrium constant, 11. Helical contact area, 12. Hydropathy, 13. Isoelectric point, 14. Long-range non-bonded energy, 15. Mean r.m.s. fluctuation displacement, 16. Molecular volume, 17. Molecular weight, 18. Normalized consensus hydrophobicity, 19. Partial specific volume, 20. Polar requirement, 21. Polarity, 22. Power to be at the C-terminal, 23. Power to be at the middle of alpha-helix, 24. Power to be at the N-terminal, 25. Refractive index, 26. Short and medium range non-bonded energy, 27. Solvent accessible reduction ratio, 28. Surrounding hydrophobicity, 29. Thermodynamic transfer hydrophobicity, 30. Total non-bonded energy, 31. Turn tendencies

b - Amino acid substitutions labeled as “deleterious” based on Provean.

**Dataset S1.4(b). Predicted structural/functional influence of the domestic cat nonsynonymous substitutions for positively selected sensory and lipid metabolism genes**

| Gene Name      | Number of Significant Amino Acid Properties | Identified Categories                       | Intense Protein Functional Changes | Number of Suggested Deleterious Amino Acid Substitutions |
|----------------|---------------------------------------------|---------------------------------------------|------------------------------------|----------------------------------------------------------|
| MERTK          | 2                                           | 9,17                                        | negative                           | 0                                                        |
| MKKS           | 3                                           | 3,4,25                                      | negative                           | 0                                                        |
| MVK            | 27                                          | 1-6,8-19,20,21,22,25-30                     | negative                           | 0                                                        |
| MYLK3          | 0                                           |                                             | negative                           | 0                                                        |
| <b>MYO15A</b>  | <b>17</b>                                   | <b>1,4,5,9,12,14-17,19,20-23,26,30,31</b>   | <b>positive</b>                    | <b>2</b>                                                 |
| <b>MYO3B</b>   | <b>0</b>                                    |                                             | <b>positive</b>                    | <b>1</b>                                                 |
| <b>MYO7A</b>   | <b>5</b>                                    | <b>7,9,12,17,26</b>                         | <b>positive</b>                    | <b>2</b>                                                 |
| <b>MYO9A</b>   | <b>13</b>                                   | <b>1,3,10-13,15,16,17,19,20,22,31</b>       | <b>positive</b>                    | <b>3</b>                                                 |
| <b>NPFFR2</b>  | <b>4</b>                                    | <b>11,16,19,26</b>                          | <b>positive</b>                    | <b>1</b>                                                 |
| NPY            | 0                                           |                                             | negative                           | 0                                                        |
| NPY1R          | 0                                           |                                             | negative                           | 0                                                        |
| <b>OR10K1</b>  | <b>2</b>                                    | <b>3,22</b>                                 | <b>positive</b>                    | <b>2</b>                                                 |
| OR10V1         | 2                                           | 9,17                                        | negative                           | 0                                                        |
| OR13H1         | 0                                           |                                             | negative                           | 0                                                        |
| <b>OR2B11</b>  | <b>1</b>                                    | <b>15</b>                                   | <b>positive</b>                    | <b>1</b>                                                 |
| PAFAH2         | 2                                           | 12,15                                       | negative                           | 0                                                        |
| PARVG          | 1                                           | 12                                          | negative                           | 0                                                        |
| PCDH4B         | 0                                           |                                             | negative                           | 0                                                        |
| PDE6B          | 2                                           | 15,26                                       | negative                           | 0                                                        |
| PLA2G2E        | 4                                           | 9,17,26,27                                  | negative                           | 0                                                        |
| <b>PLA2G3</b>  | <b>1</b>                                    | <b>17</b>                                   | <b>positive</b>                    | <b>2</b>                                                 |
| <b>PPAP2A</b>  | <b>2</b>                                    | <b>5,26</b>                                 | <b>positive</b>                    | <b>4</b>                                                 |
| PPAPDC1B       | 1                                           | 9                                           | negative                           | 0                                                        |
| PPEF1          | 6                                           | 4,11,15,22,23,28                            | negative                           | 0                                                        |
| PRKAG1         | 0                                           |                                             | negative                           | 0                                                        |
| PRKG2          | 0                                           |                                             | negative                           | 0                                                        |
| <b>PROM1</b>   | <b>16</b>                                   | <b>3,4,6,7,8,11,14-17,20,22,23,28,30,31</b> | <b>positive</b>                    | <b>6</b>                                                 |
| <b>PTPRQ</b>   | <b>25</b>                                   | <b>2-17,19,21,22,23,27~31</b>               | <b>positive</b>                    | <b>4</b>                                                 |
| <b>RTP3</b>    | <b>1</b>                                    | <b>1</b>                                    | <b>positive</b>                    | <b>1</b>                                                 |
| SHC4           | 0                                           |                                             | negative                           | 0                                                        |
| <b>SIAE</b>    | <b>2</b>                                    | <b>9,24</b>                                 | <b>positive</b>                    | <b>1</b>                                                 |
| SLCO1A2        | 5                                           | 7,10,11,16,23                               | negative                           | 0                                                        |
| SMG1           | 12                                          | 3,10,11,12,14-17,22,23,24,29                | negative                           | 0                                                        |
| STARD5         | 1                                           | 9                                           | negative                           | 0                                                        |
| <b>TAS2R3</b>  | <b>10</b>                                   | <b>2,3,5,8,10,12,18,19,25,30</b>            | <b>positive</b>                    | <b>3</b>                                                 |
| <b>TAS2R38</b> | <b>11</b>                                   | <b>3,5,6,7,8,10,11,15,26,30,31</b>          | <b>positive</b>                    | <b>1</b>                                                 |
| THBS2          | 12                                          | 2,3,7-11,15,17,22,26,31                     | negative                           | 0                                                        |

Significant genes common to both approaches are highlighted in red.

a - TreeSAAP is used to measure structural and biochemical properties of amino acid replacement using a threshold of  $P < 0.001$ . 31 categories are tested as follows: 1. Alpha-helical tendencies, 2. Average number of surrounding residues, 3. Beta-structure tendencies, 4. Bulkiness, 5. Buriedness, 6. Chromatographic index, 7. Coil tendencies, 8. Composition, 9. Compressibility, 10. Equilibrium constant, 11. Helical contact area, 12. Hydropathy, 13. Isoelectric point, 14. Long-range non-bonded energy, 15. Mean r.m.s. fluctuation displacement, 16. Molecular volume, 17. Molecular weight, 18. Normalized consensus hydrophobicity, 19. Partial specific volume, 20. Polar requirement, 21. Polarity, 22. Power to be at the C-terminal, 23. Power to be at the middle of alpha-helix, 24. Power to be at the N-terminal, 25. Refractive index, 26. Short and medium range non-bonded energy, 27. Solvent accessible reduction ratio, 28. Surrounding hydrophobicity, 29. Thermodynamic transfer hydrophobicity, 30. Total non-bonded energy, 31. Turn tendencies

b - Amino acid substitutions labeled as "deleterious" based on Provean.



**Dataset S1.5. Enriched pathways among genes under positive selection in the domestic cat (Felinae) lineage**

| <b>PATHWAY COMMONS CATEGORY</b>                                      | <b>C</b> | <b>O</b> | <b>E</b> | <b>GENES</b>                                                                          |
|----------------------------------------------------------------------|----------|----------|----------|---------------------------------------------------------------------------------------|
| BETA-OXIDATION OF PRISTANOYL-COA                                     | 8        | 4        | 0.11     | ACOX2, AMACR, ACOX3, ACOT8                                                            |
| BILE ACID AND BILE SALT METABOLISM                                   | 27       | 5        | 0.37     | SLCO1A2, ACOX2, AMACR, HSD3B7, ACOT8                                                  |
| SYNTHESIS OF BILE ACIDS AND BILE SALTS VIA 7ALPHA-HYDROXYCHOLESTEROL | 15       | 4        | 0.21     | ACOX2, AMACR, HSD3B7, ACOT8                                                           |
| <b>PEROXISOMAL LIPID METABOLISM</b>                                  | 20       | 4        | 0.28     | ACOX2, AMACR, ACOX3, ACOT8                                                            |
| <b>METABOLISM OF LIPIDS AND LIPOPROTEINS</b>                         | 258      | 12       | 3.57     | LCAT, CYP27B1, PPAP2A, SLCO1A2, MVK, HADH, STARD5, ACOX2, AMACR, ACOX3, HSD3B7, ACOT8 |
| <b>KEGG CATEGORY</b>                                                 |          |          |          |                                                                                       |
| ECM-RECEPTOR INTERACTION                                             | 85       | 6        | 1.18     | HMMR, ITGA9, THBS2, LAMC2, ITGA2B, COL6A3                                             |
| LONG-TERM DEPRESSION                                                 | 70       | 6        | 0.97     | PRKG2, PLA2G2E, BRAF, GRIA2, ITPR3, PLA2G3                                            |
| PRIMARY BILE ACID BIOSYNTHESIS                                       | 16       | 3        | 0.22     | ACOX2, AMACR, HSD3B7                                                                  |
| <b>ETHER LIPID METABOLISM</b>                                        | 36       | 4        | 0.5      | PLA2G2E, PPAP2A, PAFAH2, PLA2G3                                                       |
| FOCAL ADHESION                                                       | 200      | 9        | 2.77     | SHC4, BRAF, PARVG, MYLK3, ITGA9, THBS2, LAMC2, ITGA2B, COL6A3                         |
| ALPHA-LINOLENIC ACID METABOLISM                                      | 20       | 3        | 0.28     | PLA2G2E, ACOX3, PLA2G3                                                                |
| PEROXISOME                                                           | 79       | 5        | 1.09     | ACOX2, MVK, AMACR, ACOX3, ACOT8                                                       |
| <b>GO CATEGORY</b>                                                   |          |          |          |                                                                                       |
| <b>LIPID MODIFICATION</b>                                            | 143      | 11       | 2.16     | LCAT, PPAP2A, HADH, PRKAG1, ACOX2, AMACR, INPP5J, ACOX3, SMG1, PPAPDC1B, ACOT8        |
| <b>FATTY ACID BETA-OXIDATION USING ACYL-COA OXIDASE</b>              | 11       | 4        | 0.17     | ACOX2, AMACR, ACOX3, ACOT8                                                            |
| CARBOXYLIC ESTER HYDROLASE ACTIVITY                                  | 116      | 8        | 1.71     | LCAT, PAFAH2, ACOT11, PLA2G2E, SIAE, ABHD1, PLA2G3, ACOT8                             |
| PRISTANOYL-COA OXIDASE ACTIVITY                                      | 2        | 2        | 0.03     | ACOX2, ACOX3                                                                          |
| BRCA1-BARD1 COMPLEX                                                  | 2        | 2        | 0.03     | BRCA1, BARD1                                                                          |

**USER DATA & PARAMETERS - N = 281 genes submitted, Genes mapped to unique Entrez Gene IDs: 281, Organism: hsapiens, Id Type: gene\_symbol, Ref Set: entrezgene\_protein-coding, Significance Level: .05, Statistics Test: Hypergeometric, MTC: BH, Minimum: 2**

**COLUMN HEADINGS - number of reference genes in the category (C), number of genes in the gene set and also in the category (O), expected number in the category (E).**

**Dataset S1.6. Enriched gene ontology categories among genes under positive selection in Carnivora**

| GO CATEGORY                                                                       | PATHWAY ID | C    | O   | E      | R     | rawP     | adjP   |
|-----------------------------------------------------------------------------------|------------|------|-----|--------|-------|----------|--------|
| pattern recognition receptor activity                                             | GO:0008329 | 15   | 4   | 0.39   | 10.29 | 0.0005   | 0.0482 |
| glycosaminoglycan binding                                                         | GO:0005539 | 174  | 13  | 4.51   | 2.88  | 0.0006   | 0.0482 |
| diacyl lipopeptide binding                                                        | GO:0042498 | 2    | 2   | 0.05   | 38.60 | 0.0007   | 0.0482 |
| secondary active oligopeptide transmembrane transporter activity                  | GO:0015322 | 2    | 2   | 0.05   | 38.60 | 0.0007   | 0.0482 |
| bacterial cell surface binding                                                    | GO:0051635 | 17   | 4   | 0.44   | 9.08  | 0.0008   | 0.0482 |
| proton-dependent oligopeptide secondary active transmembrane transporter activity | GO:0005427 | 2    | 2   | 0.05   | 38.60 | 0.0007   | 0.0482 |
| carbohydrate derivative binding                                                   | GO:0097367 | 189  | 14  | 4.90   | 2.86  | 0.0004   | 0.0482 |
| cytoplasmic part                                                                  | GO:0044444 | 6728 | 210 | 170    | 1.23  | 5.38E-05 | 0.0157 |
| plasma membrane part                                                              | GO:0044459 | 1908 | 72  | 48.38  | 1.49  | 0.0003   | 0.0292 |
| intrinsic to plasma membrane                                                      | GO:0031226 | 1255 | 53  | 31.82  | 1.67  | 0.0002   | 0.0292 |
| integral to plasma membrane                                                       | GO:0005887 | 1214 | 49  | 30.78  | 1.59  | 0.0008   | 0.0389 |
| Toll-like receptor 2-Toll-like receptor 6 protein                                 | GO:0035355 | 2    | 2   | 0.05   | 2.41  | 0.0008   | 0.0389 |
| mitochondrial matrix                                                              | GO:0005759 | 278  | 17  | 7.05   | 2.41  | 0.0008   | 0.0389 |
| cytoplasm                                                                         | GO:0005737 | 9051 | 261 | 229.5  | 1.14  | 0.001    | 0.0417 |
| membrane                                                                          | GO:0016020 | 7631 | 224 | 193.5  | 1.16  | 0.0015   | 0.0487 |
| cell periphery                                                                    | GO:0071944 | 4286 | 136 | 108.68 | 1.25  | 0.0015   | 0.0487 |

**USER DATA & PARAMETERS** - N = 467 genes submitted, Genes mapped to unique Entrez Gene IDs: 466, Organism: hsapiens, Id Type: gene\_symbol, Ref Set: entrezgene\_protein-coding, Significance Level: .05, Statistics Test: Hypergeometric, MTC: BH, Minimum: 2

**COLUMN HEADINGS** - number of reference genes in the category (C), number of genes in the gene set and also in the category (O), expected number in the category (E), Ratio of enrichment (R), p value from hypergeometric test (rawP), and p value adjusted by the multiple test adjustment (adjP).

**Dataset S1.7. Enriched gene ontology categories among genes under positive selection in Felidae**

| <b>PATHWAY COMMONS</b>                                                          | <b>Pathway ID</b> | <b>C</b> | <b>O</b> | <b>E</b> | <b>R</b> | <b>rawP</b> | <b>adjP</b> |
|---------------------------------------------------------------------------------|-------------------|----------|----------|----------|----------|-------------|-------------|
| <b>AlphaE beta7 integrin cell surface interactions</b>                          | 1632              | 3        | 3        | 0.5      | 61.46    | 4.27E-06    | 0.0012      |
| <b>Adaptive Immune System</b>                                                   | 515               | 237      | 14       | 3        | 3.63     | 3.64E-05    | 0.0049      |
| <b>Immunoregulatory interactions between a Lymphoid and a non-Lymphoid cell</b> | 1098              | 52       | 6        | 0.82     | 7.09     | 0.0002      | 0.0180      |
| <b>Immune System</b>                                                            | 522               | 522      | 20       | 8.49     | 2.35     | 0.0004      | 0.027       |
| <b>Interaction between L1 and Ankyrins</b>                                      | 45                | 12       | 3        | 0.2      | 15.37    | 0.0008      | 0.0432      |
| <b>KEGG CATEGORY</b>                                                            |                   |          |          |          |          |             |             |
| <b>Cell adhesion molecules (CAMs)</b>                                           | 4514              | 133      | 9        | 2.16     | 4.16     | 0.0003      | 0.0246      |
| <b>GO CATEGORY</b>                                                              |                   |          |          |          |          |             |             |
| <b>epoxide hydrolase activity</b>                                               | GO:0004301        | 5        | 3        | 0.09     | 33.78    | 5.40E-05    | 0.0155      |
| <b>ether hydrolase activity</b>                                                 | GO:0016803        | 7        | 3        | 0.12     | 24.13    | 0.0002      | 0.0287      |
| <b>external side of plasma membrane</b>                                         | GO:0009897        | 199      | 12       | 3.42     | 3.51     | 0.0002      | 0.0442      |

**USER DATA & PARAMETERS - N = 331 genes submitted, Genes mapped to unique Entrez Gene IDs: 331, Organism: hsapiens, Id Type: gene\_symbol, Ref Set: entrezgene\_protein-coding, Significance Level: .05, Statistics Test: Hypergeometric, MTC: BH, Minimum: 2**

**COLUMN HEADINGS - number of reference genes in the category (C), number of genes in the gene set and also in the category (O), expected number in the category (E), Ratio of enrichment (R), p value from hypergeometric test (rawP), and p value adjusted by the multiple test adjustment (adjP).**

**Dataset S1.8(a). *Felis catus* gene members that underwent rapid gene family expansions along the Felidae lineage.**

| Ensembl Gene ID    | Ensembl Family Description | Ensembl Protein Family ID(s) |
|--------------------|----------------------------|------------------------------|
| -----              |                            |                              |
| CAFE Family ID:48  |                            |                              |
| ENSFCAG00000025324 | IG HEAVY CHAIN V REGION    | ENSFM00670001235368          |
| ENSFCAG00000027432 | "                          | ENSFM00670001235368          |
| ENSFCAG00000028301 | "                          | ENSFM00670001235368          |
| ENSFCAG00000028921 | "                          | ENSFM00670001235368          |
| ENSFCAG00000023488 | "                          | ENSFM00670001235368          |
| ENSFCAG00000026432 | "                          | ENSFM00670001235368          |
| ENSFCAG00000029107 | "                          | ENSFM00670001235368          |
| ENSFCAG00000028889 | "                          | ENSFM00670001235368          |
| ENSFCAG00000029901 | "                          | ENSFM00670001235368          |
| ENSFCAG00000028814 | "                          | ENSFM00670001235368          |
| ENSFCAG00000023635 | "                          | ENSFM00670001235368          |
| ENSFCAG00000027142 | "                          | ENSFM00670001235368          |
| ENSFCAG00000028661 | "                          | ENSFM00670001235368          |
| ENSFCAG00000023737 | "                          | ENSFM00670001235368          |
| ENSFCAG00000026570 | "                          | ENSFM00670001235368          |
| ENSFCAG00000025755 | "                          | ENSFM00670001235368          |
| ENSFCAG00000027760 | "                          | ENSFM00670001235368          |
| ENSFCAG00000026585 | "                          | ENSFM00670001235368          |
| ENSFCAG00000031242 | "                          | ENSFM00670001235368          |
| ENSFCAG00000023332 | "                          | ENSFM00670001235368          |
| ENSFCAG00000023265 | "                          | ENSFM00670001235368          |
| ENSFCAG00000023423 | "                          | ENSFM00670001235368          |
| ENSFCAG00000023729 | "                          | ENSFM00670001235368          |
| ENSFCAG00000030410 | "                          | ENSFM00670001235368          |
| ENSFCAG00000029880 | "                          | ENSFM00670001235368          |
| ENSFCAG00000022386 | "                          | ENSFM00670001235368          |
| ENSFCAG00000026880 | "                          | ENSFM00670001235368          |
| ENSFCAG00000022825 | HEAVY V                    | ENSFM00670001235643          |
| ENSFCAG00000024010 | IG HEAVY CHAIN V I REGION  | ENSFM00670001235685          |
| ENSFCAG00000022778 | "                          | ENSFM00670001235685          |
| ENSFCAG00000023329 | "                          | ENSFM00670001235685          |
| ENSFCAG00000022071 | UNKNOWN                    | ENSFM00700001406400          |
| -----              |                            |                              |

**Dataset S1.8(b). *Felis catus* gene members that underwent rapid gene family expansions along the Felidae lineage.**

| CAFE Family ID:60   |                                                                                                        |                     |
|---------------------|--------------------------------------------------------------------------------------------------------|---------------------|
| ENSFCAG00000001090  | PEPTIDYL PROLYL CIS TRANS ISOMERASE 1<br>PPIASE EC_5.2.1.8 ROTAMASE                                    | ENSFM00500000270856 |
| ENSFCAG00000005373  | "                                                                                                      | ENSFM00500000271254 |
| ENSFCAG000000028008 | "                                                                                                      | ENSFM00500000272090 |
| ENSFCAG00000004182  | "                                                                                                      | ENSFM00500000269861 |
| ENSFCAG000000008910 | "                                                                                                      | ENSFM00500000269861 |
| ENSFCAG00000006027  | PEPTIDYL PROLYL CIS TRANS ISOMERASE<br>PPIASE EC_5.2.1.8 CYCLOPHILIN CYCLOSPORIN<br>A BINDING ROTAMASE | ENSFM00600000921134 |
| ENSFCAG00000009159  | "                                                                                                      | ENSFM00600000921134 |
| ENSFCAG000000023140 | "                                                                                                      | ENSFM00600000921134 |
| ENSFCAG000000028094 | "                                                                                                      | ENSFM00600000921134 |
| ENSFCAG000000028260 | "                                                                                                      | ENSFM00600000921134 |
| ENSFCAG000000030523 | "                                                                                                      | ENSFM00600000921134 |
| ENSFCAG000000027344 | "                                                                                                      | ENSFM00600000921134 |
| ENSFCAG000000028314 | "                                                                                                      | ENSFM00600000921134 |
| ENSFCAG000000029878 | "                                                                                                      | ENSFM00600000921134 |
| ENSFCAG000000030193 | "                                                                                                      | ENSFM00600000921134 |
| ENSFCAG000000028578 | "                                                                                                      | ENSFM00600000921134 |
| ENSFCAG000000012326 | "                                                                                                      | ENSFM00600000921134 |
| ENSFCAG000000026216 | "                                                                                                      | ENSFM00600000921134 |
| ENSFCAG000000025543 | "                                                                                                      | ENSFM00600000921134 |
| ENSFCAG000000022115 | "                                                                                                      | ENSFM00600000921134 |
| ENSFCAG00000000811  | PEPTIDYL PROLYL CIS TRANS ISOMERASE<br>PPIASE EC_5.2.1.8 ROTAMASE                                      | ENSFM00710001441744 |
| ENSFCAG000000022870 | "                                                                                                      | ENSFM00710001441744 |
| ENSFCAG000000028615 | "                                                                                                      | ENSFM00710001441744 |
| ENSFCAG000000028926 | "                                                                                                      | ENSFM00710001441744 |
| ENSFCAG000000028168 | "                                                                                                      | ENSFM00710001441744 |
| ENSFCAG00000009056  | PEPTIDYLPROLYL ISOMERASE DOMAIN AND<br>WD REPEAT CONTAINING 1 EC_5.2.1.8                               | ENSFM00500000270357 |
| ENSFCAG000000027963 | RANBP2 AND GRIP DOMAIN CONTAINING RAN<br>BINDING 2 RANBP2 RANB                                         | ENSFM00500000270422 |

-----

**Dataset S1.8(c). *Felis catus* gene members that underwent rapid gene family expansions along the Felidae lineage.**

| CAFE Family ID:77  |                                                                      |                     |
|--------------------|----------------------------------------------------------------------|---------------------|
|                    | DYNEIN HEAVY CHAIN AXONEMAL AXONEMAL                                 |                     |
| ENSFCAG0000000768  | BETA DYNEIN HEAVY CHAIN CILIARY DYNEIN<br>HEAVY CHAIN                | ENSFM00710001441583 |
| ENSFCAG00000002303 | "                                                                    | ENSFM00710001441583 |
| ENSFCAG00000003487 | "                                                                    | ENSFM00710001441583 |
| ENSFCAG00000008938 | "                                                                    | ENSFM00710001441583 |
| ENSFCAG00000009626 | "                                                                    | ENSFM00710001441583 |
| ENSFCAG00000011050 | "                                                                    | ENSFM00710001441583 |
| ENSFCAG00000011062 | "                                                                    | ENSFM00710001441583 |
| ENSFCAG00000011997 | "                                                                    | ENSFM00710001441583 |
| ENSFCAG00000014410 | "                                                                    | ENSFM00710001441583 |
| ENSFCAG00000015163 | "                                                                    | ENSFM00710001441583 |
| ENSFCAG00000015341 | "                                                                    | ENSFM00710001441583 |
| ENSFCAG00000015710 | "                                                                    | ENSFM00710001441583 |
| ENSFCAG00000024375 | "                                                                    | ENSFM00710001441583 |
| ENSFCAG00000031892 | "                                                                    | ENSFM00710001441583 |
| ENSFCAG00000028573 | "                                                                    | ENSFM00710001441583 |
| ENSFCAG00000030613 | "                                                                    | ENSFM00710001441583 |
| ENSFCAG00000022940 | "                                                                    | ENSFM00710001441583 |
| ENSFCAG00000030413 | "                                                                    | ENSFM00710001441583 |
| ENSFCAG00000023988 | "                                                                    | ENSFM00710001441583 |
| ENSFCAG00000027018 | "                                                                    | ENSFM00710001441583 |
| ENSFCAG00000025942 | "                                                                    | ENSFM00710001441583 |
| ENSFCAG00000029696 | "                                                                    | ENSFM00710001441583 |
| ENSFCAG00000025884 | "                                                                    | ENSFM00710001441583 |
|                    | DYNEIN HEAVY CHAIN 14 AXONEMAL                                       |                     |
| ENSFCAG00000029772 | AXONEMAL BETA DYNEIN HEAVY CHAIN 14<br>CILIARY DYNEIN HEAVY CHAIN 14 | ENSFM00250000013821 |
| ENSFCAG00000027160 | UNKNOWN                                                              | ENSFM00700001403725 |
| ENSFCAG00000003480 | UNKNOWN                                                              | ENSFM00700001395909 |

| CAFE Family ID:96  |                                           |                     |
|--------------------|-------------------------------------------|---------------------|
|                    | T CELL RECEPTOR ALPHA CHAIN V REGION PY14 |                     |
| ENSFCAG00000024916 | PRECURSOR                                 | ENSFM00670001239630 |
| ENSFCAG00000025340 | UNCHARACTERIZED FRAGMENT                  | ENSFM00670001238133 |
| ENSFCAG00000028266 | "                                         | ENSFM00670001240217 |
| ENSFCAG00000026476 | "                                         | ENSFM00670001257046 |
| ENSFCAG00000030178 | "                                         | ENSFM00670001244595 |
| ENSFCAG00000030540 | UNKNOWN                                   | ENSFM00670001238314 |
| ENSFCAG00000023413 | "                                         | ENSFM00700001403106 |
| ENSFCAG00000028123 | "                                         | ENSFM00670001238314 |

**Dataset S1.8(d). *Felis catus* gene members that underwent rapid gene family expansions along the Felidae lineage.**

| CAFE Family ID:107 |                                             |                     |
|--------------------|---------------------------------------------|---------------------|
| ENSFCAG0000007354  | VOMERONASAL TYPE 1 RECEPTOR V1R<br>RECEPTOR | ENSFM00420000140525 |
| ENSFCAG00000013746 | "                                           | ENSFM00420000140525 |
| ENSFCAG00000026501 | "                                           | ENSFM00390000126342 |
| ENSFCAG00000023564 | "                                           | ENSFM00420000140525 |
| ENSFCAG00000030794 | "                                           | ENSFM00420000140525 |
| ENSFCAG00000030467 | "                                           | ENSFM00420000140525 |
| ENSFCAG00000029349 | "                                           | ENSFM00420000140525 |
| ENSFCAG00000028999 | "                                           | ENSFM00500000270777 |
| ENSFCAG00000025970 | "                                           | ENSFM00500000270777 |
| ENSFCAG00000031455 | "                                           | ENSFM00420000140525 |
| ENSFCAG00000029994 | "                                           | ENSFM00420000140525 |
| ENSFCAG00000028171 | "                                           | ENSFM00500000269919 |
| ENSFCAG00000025619 | "                                           | ENSFM00420000140525 |
| ENSFCAG00000022751 | "                                           | ENSFM00420000140525 |
| ENSFCAG00000030971 | "                                           | ENSFM00420000140525 |
| ENSFCAG00000031841 | "                                           | ENSFM00570000851064 |
| ENSFCAG00000026750 | "                                           | ENSFM00420000140525 |
| ENSFCAG00000022670 | "                                           | ENSFM00420000140525 |
| ENSFCAG00000000122 | "                                           | ENSFM00420000140525 |
| ENSFCAG00000022668 | "                                           | ENSFM00500000270777 |
| ENSFCAG00000029277 | "                                           | ENSFM00420000140525 |
| ENSFCAG00000031101 | "                                           | ENSFM00500000269919 |

| CAFE Family ID:159 |                          |                     |
|--------------------|--------------------------|---------------------|
| ENSFCAG00000002807 | TRANSCRIPTION FACTOR SOX | ENSFM00500000269754 |
| ENSFCAG00000004219 | "                        | ENSFM00500000269754 |
| ENSFCAG00000015685 | "                        | ENSFM00500000269754 |
| ENSFCAG00000022613 | "                        | ENSFM00670001235710 |
| ENSFCAG00000009619 | SOX 15                   | ENSFM00500000274021 |

| CAFE Family ID:323 |                                |                     |
|--------------------|--------------------------------|---------------------|
| ENSFCAG00000001958 | COLLAGEN ALPHA CHAIN PRECURSOR | ENSFM00250000000231 |
| ENSFCAG00000004005 | "                              | ENSFM00250000000231 |
| ENSFCAG00000009383 | "                              | ENSFM00250000000231 |
| ENSFCAG00000026038 | "                              | ENSFM00250000000231 |
| ENSFCAG00000029007 | "                              | ENSFM00250000000231 |
| ENSFCAG00000025042 | "                              | ENSFM00250000000231 |
| ENSFCAG00000031671 | UNKNOWN                        | ENSFM00700001406119 |
| ENSFCAG00000030864 | "                              | ENSFM00700001407229 |
| ENSFCAG00000025023 | "                              | ENSFM00700001406121 |

**Dataset S1.8(e). *Felis catus* gene members that underwent rapid gene family expansions along the Felidae lineage.**

| CAFE Family ID:415 |                                   |                     |
|--------------------|-----------------------------------|---------------------|
| ENSFCAG0000003805  | HISTONE H1                        | ENSFM00670001235652 |
| ENSFCAG00000005967 | "                                 | ENSFM00670001235652 |
| ENSFCAG00000006079 | "                                 | ENSFM00670001235652 |
| ENSFCAG00000006768 | "                                 | ENSFM00670001235652 |
| ENSFCAG00000015177 | "                                 | ENSFM00670001235652 |
| ENSFCAG00000005970 | HISTONE H1T TESTICULAR H1 HISTONE | ENSFM00600000922221 |
| ENSFCAG00000005962 | HISTONE H1 1 HISTONE H1A          | ENSFM00670001237167 |
| ENSFCAG00000023697 | UNKNOWN                           | ENSFM00700001402417 |

| CAFE Family ID:494 |                                                 |                     |
|--------------------|-------------------------------------------------|---------------------|
| ENSFCAG00000027832 | DIAPHANOUS HOMOLOG DIAPHANOUS<br>RELATED FORMIN | ENSFM00260000050429 |
| ENSFCAG00000031011 | "                                               | ENSFM00260000050429 |
| ENSFCAG00000025687 | "                                               | ENSFM00260000050429 |
| ENSFCAG00000027130 | UNKNOWN                                         | ENSFM00700001407483 |
| ENSFCAG00000031194 | "                                               | ENSFM00700001406364 |
| ENSFCAG00000029496 | "                                               | ENSFM00700001403036 |
| ENSFCAG00000029591 | "                                               | ENSFM00700001406366 |
| ENSFCAG00000027080 | "                                               | ENSFM00700001406365 |

| CAFE Family ID:507 |                                                                                                                                                            |                     |
|--------------------|------------------------------------------------------------------------------------------------------------------------------------------------------------|---------------------|
| ENSFCAG00000009104 | PARTITIONING DEFECTIVE 3 HOMOLOG B<br>AMYOTROPHIC LATERAL SCLEROSIS 2<br>CHROMOSOMAL REGION CANDIDATE GENE 19<br>PAR3 BETA PARTITIONING DEFECTIVE 3 PAR3 L | ENSFM00610000952891 |
| ENSFCAG00000026384 | "                                                                                                                                                          | ENSFM00610000952891 |
| ENSFCAG00000025827 | "                                                                                                                                                          | ENSFM00610000952891 |
| ENSFCAG00000022493 | "                                                                                                                                                          | ENSFM00610000952891 |
| ENSFCAG00000026773 | "                                                                                                                                                          | ENSFM00610000952891 |
| ENSFCAG00000025870 | "                                                                                                                                                          | ENSFM00610000952891 |
| ENSFCAG00000024471 | UNKNOWN                                                                                                                                                    | ENSFM00700001403157 |
| ENSFCAG00000027778 | "                                                                                                                                                          | ENSFM00700001404186 |



**Dataset S1.8(f). *Felis catus* gene members that underwent rapid gene family expansions along the Felidae lineage.**

| CAFE Family ID:598 |                                                                       |                     |
|--------------------|-----------------------------------------------------------------------|---------------------|
| ENSFCAG00000015547 | MYOTILIN MYOFIBRILLAR TITIN IG DOMAINS<br>TITIN IMMUNOGLOBULIN DOMAIN | ENSFM00570000851448 |
| ENSFCAG00000026398 | "                                                                     | ENSFM00570000851448 |
| ENSFCAG00000023378 | MYOSIN LIGHT CHAIN KINASE SMOOTH<br>MUSCLE FRAGMENT MLCK EC_2.7.11.18 | ENSFM00710001444534 |
| ENSFCAG00000023052 | MYOSIN LIGHT CHAIN KINASE EC_2.7.11.18                                | ENSFM00550000743135 |
| ENSFCAG00000031720 | PALLADIN                                                              | ENSFM00690001356798 |
| ENSFCAG00000027262 | "                                                                     | ENSFM00570000851711 |
| ENSFCAG00000024606 | "                                                                     | ENSFM00570000851711 |
| ENSFCAG00000003424 | "                                                                     | ENSFM00570000851679 |
| ENSFCAG00000031314 | UNKNOWN                                                               | ENSFM00700001403043 |

| CAFE Family ID:757 |                                                |                     |
|--------------------|------------------------------------------------|---------------------|
| ENSFCAG00000030661 | MYOMEGALIN PHOSPHODIESTERASE 4D<br>INTERACTING | ENSFM00250000001701 |
| ENSFCAG00000026455 | "                                              | ENSFM00250000001701 |
| ENSFCAG00000028868 | "                                              | ENSFM00250000001701 |
| ENSFCAG00000023617 | "                                              | ENSFM00250000001701 |
| ENSFCAG00000031847 | "                                              | ENSFM00250000001701 |
| ENSFCAG00000027086 | "                                              | ENSFM00250000001701 |
| ENSFCAG00000031642 | NEUROBLASTOMA BREAKPOINT FAMILY<br>MEMBER 6    | ENSFM00500000284802 |
| ENSFCAG00000031382 | UNKNOWN                                        | ENSFM00700001403283 |

| CAFE Family ID:764 |                                                                                   |                     |
|--------------------|-----------------------------------------------------------------------------------|---------------------|
| ENSFCAG00000005848 | SET PHOSPHATASE 2A INHIBITOR I2PP2A I<br>2PP2A TEMPLATE ACTIVATING FACTOR I TAF I | ENSFM00500000270208 |
| ENSFCAG00000005959 | "                                                                                 | ENSFM00500000270208 |
| ENSFCAG00000021897 | "                                                                                 | ENSFM00500000270208 |
| ENSFCAG00000024431 | "                                                                                 | ENSFM00500000270208 |
| ENSFCAG00000031705 | "                                                                                 | ENSFM00500000270208 |
| ENSFCAG00000024762 | "                                                                                 | ENSFM00500000270208 |

**Dataset S1.8(g). *Felis catus* gene members that underwent rapid gene family expansions along the Felidae lineage.**

|                    |                                                                                                                 |                     |
|--------------------|-----------------------------------------------------------------------------------------------------------------|---------------------|
| CAFE Family ID:950 |                                                                                                                 |                     |
| ENSFCAG0000006215  | PIEZO TYPE MECHANOSENSITIVE ION CHANNEL<br>COMPONENT 1 MEMBRANE INDUCED BY BETA<br>AMYLOID TREATMENT MIB FAM38A | ENSFM0025000000782  |
| ENSFCAG00000031105 | "                                                                                                               | ENSFM0025000000782  |
| ENSFCAG00000026991 | "                                                                                                               | ENSFM0025000000782  |
| ENSFCAG00000022624 | "                                                                                                               | ENSFM0025000000782  |
| ENSFCAG00000027894 | UNKNOWN                                                                                                         | ENSFM00700001403972 |
| ENSFCAG00000029479 | "                                                                                                               | ENSFM00700001407161 |

|                     |                                                |                     |
|---------------------|------------------------------------------------|---------------------|
| CAFE Family ID:1069 |                                                |                     |
| ENSFCAG00000009998  | NUCLEAR RECEPTOR COREPRESSOR 1 N COR N<br>COR1 | ENSFM00250000001120 |
| ENSFCAG00000026816  | "                                              | ENSFM00250000001120 |
| ENSFCAG00000030219  | "                                              | ENSFM00250000001120 |
| ENSFCAG00000025434  | "                                              | ENSFM00250000001120 |
| ENSFCAG00000027575  | "                                              | ENSFM00250000001120 |
| ENSFCAG00000029502  | "                                              | ENSFM00250000001120 |
| ENSFCAG00000031193  | "                                              | ENSFM00250000001120 |

|                     |                                       |                     |
|---------------------|---------------------------------------|---------------------|
| CAFE Family ID:1264 |                                       |                     |
| ENSFCAG00000000945  | E3 UBIQUITIN LIGASE RNF213 EC_6.3.2.- | ENSFM00440000236907 |
| ENSFCAG00000024632  | "                                     | ENSFM00440000236907 |
| ENSFCAG00000022783  | "                                     | ENSFM00440000236907 |
| ENSFCAG00000026190  | "                                     | ENSFM00440000236907 |
| ENSFCAG00000022578  | "                                     | ENSFM00440000236907 |
| ENSFCAG00000023279  | "                                     | ENSFM00440000236907 |
| ENSFCAG00000022915  | "                                     | ENSFM00440000236907 |
| ENSFCAG00000024960  | UNKNOWN                               | ENSFM00700001402418 |

|                     |                                                                                                                                                                                                                      |                     |
|---------------------|----------------------------------------------------------------------------------------------------------------------------------------------------------------------------------------------------------------------|---------------------|
| CAFE Family ID:1785 |                                                                                                                                                                                                                      |                     |
| ENSFCAG00000027649  | HERV R_7Q21 2 PROVIRUS ANCESTRAL ENV<br>POLYPROTEIN PRECURSOR ERV 3 ENVELOPE<br>ERV3 ENVELOPE ERV3 1 ENVELOPE ENVELOPE<br>POLYPROTEIN HERV R ENVELOPE ERV R<br>ENVELOPE [CONTAINS SURFACE SU ;<br>TRANSMEMBRANE TM ] | ENSFM00250000016078 |
| ENSFCAG00000025816  | "                                                                                                                                                                                                                    | ENSFM00250000016078 |
| ENSFCAG00000027786  | "                                                                                                                                                                                                                    | ENSFM00250000016078 |
| ENSFCAG00000029632  | "                                                                                                                                                                                                                    | ENSFM00250000016078 |
| ENSFCAG00000026669  | "                                                                                                                                                                                                                    | ENSFM00250000016078 |
| ENSFCAG00000031768  | "                                                                                                                                                                                                                    | ENSFM00250000016078 |

**Dataset S1.8(h). *Felis catus* gene members that underwent rapid gene family expansions along the Felidae lineage.**

|                     |                                                                                                                            |                     |
|---------------------|----------------------------------------------------------------------------------------------------------------------------|---------------------|
| CAFE Family ID:2247 |                                                                                                                            |                     |
| ENSFCAG00000018707  | EYES SHUT HOMOLOG FRAGMENT EPIDERMAL<br>GROWTH FACTOR 10 EGF 10 EPIDERMAL<br>GROWTH FACTOR 11 EGF 11 SPACEMAKER<br>HOMOLOG | ENSFM00570000852066 |
| ENSFCAG00000024318  | "                                                                                                                          | ENSFM00690001356937 |
| ENSFCAG00000022442  | "                                                                                                                          | ENSFM00690001356937 |
| ENSFCAG00000030693  | EYES SHUT                                                                                                                  | ENSFM00570000851871 |
| ENSFCAG00000024482  | "                                                                                                                          | ENSFM00570000851871 |
| ENSFCAG00000030936  | UNKNOWN                                                                                                                    | ENSFM00700001405307 |

|                     |                                                              |                     |
|---------------------|--------------------------------------------------------------|---------------------|
| CAFE Family ID:2388 |                                                              |                     |
| ENSFCAG00000013038  | GLYCINE CLEAVAGE SYSTEM H PROTEIN<br>MITOCHONDRIAL PRECURSOR | ENSFM00500000271167 |
| ENSFCAG00000025063  | "                                                            | ENSFM00500000271167 |
| ENSFCAG00000024721  | UNKNOWN                                                      | ENSFM00700001404018 |

|                     |                                                                                           |                     |
|---------------------|-------------------------------------------------------------------------------------------|---------------------|
| CAFE Family ID:2487 |                                                                                           |                     |
| ENSFCAG00000014455  | 10 KDA HEAT SHOCK PROTEIN<br>MITOCHONDRIAL HSP10.10 KDA CHAPERONIN<br>CHAPERONIN 10 CPN10 | ENSFM00670001235755 |
| ENSFCAG00000028974  | "                                                                                         | ENSFM00670001235755 |
| ENSFCAG00000025005  | UNKNOWN                                                                                   | ENSFM00700001401236 |
| ENSFCAG00000024093  | "                                                                                         | ENSFM00700001401235 |
| ENSFCAG00000023339  | "                                                                                         | ENSFM00700001401234 |

|                     |                                                              |                     |
|---------------------|--------------------------------------------------------------|---------------------|
| CAFE Family ID:2491 |                                                              |                     |
| ENSFCAG00000001973  | LEUCINE RICH REPEAT SERINE/THREONINE<br>KINASE 1 EC_2.7.11.1 | ENSFM00250000001794 |
| ENSFCAG00000030173  | UNKNOWN                                                      | ENSFM00700001403499 |
| ENSFCAG00000027327  | "                                                            | ENSFM00700001401791 |

|                     |                                                                                                                                                               |                     |
|---------------------|---------------------------------------------------------------------------------------------------------------------------------------------------------------|---------------------|
| CAFE Family ID:2587 |                                                                                                                                                               |                     |
| ENSFCAG00000023000  | UBIQUITIN CARBOXYL TERMINAL HYDROLASE<br>40 EC_3.4.19.12 DEUBIQUITINATING ENZYME<br>40 UBIQUITIN THIOESTERASE 40 UBIQUITIN<br>SPECIFIC PROCESSING PROTEASE 40 | ENSFM00250000005400 |
| ENSFCAG00000025764  | "                                                                                                                                                             | ENSFM00250000005400 |
| ENSFCAG00000028768  | "                                                                                                                                                             | ENSFM00250000005400 |

|                     |                                       |                     |
|---------------------|---------------------------------------|---------------------|
| CAFE Family ID:2614 |                                       |                     |
| ENSFCAG00000005785  | NONSENSE 2 UP FRAMESHIFT SUPPRESSOR 2 | ENSFM00250000002346 |
| ENSFCAG00000030556  | "                                     | ENSFM00250000002346 |
| ENSFCAG00000024774  | "                                     | ENSFM00250000002346 |

**Dataset S1.8(i). *Felis catus* gene members that underwent rapid gene family expansions along the Felidae lineage.**

-----

|                     |                              |                     |
|---------------------|------------------------------|---------------------|
| CAFE Family ID:2825 |                              |                     |
| ENSFCAG00000023028  | SYNAPTONEMAL COMPLEX 1 SCP 1 | ENSFM00250000006405 |
| ENSFCAG00000022262  | "                            | ENSFM00250000006405 |
| ENSFCAG00000029189  | "                            | ENSFM00250000006405 |

-----

|                     |                                                                                                                                                               |                     |
|---------------------|---------------------------------------------------------------------------------------------------------------------------------------------------------------|---------------------|
| CAFE Family ID:2831 |                                                                                                                                                               |                     |
| ENSFCAG00000004711  | TRANSCRIPTION ELONGATION FACTOR B<br>POLYPEPTIDE 2 ELONGIN 18 KDA SUBUNIT<br>ELONGIN B ELOB RNA POLYMERASE II<br>TRANSCRIPTION FACTOR SIII SUBUNIT B SIII P18 | ENSFM00500000273664 |
| ENSFCAG00000029930  | "                                                                                                                                                             | ENSFM00500000273664 |
| ENSFCAG00000026327  | "                                                                                                                                                             | ENSFM00500000273664 |

-----

|                     |                                   |                     |
|---------------------|-----------------------------------|---------------------|
| CAFE Family ID:3042 |                                   |                     |
| ENSFCAG00000026757  | COILED COIL DOMAIN CONTAINING 168 | ENSFM00570000852061 |
| ENSFCAG00000022657  | "                                 | ENSFM00570000852061 |
| ENSFCAG00000023173  | UNKNOWN                           | ENSFM00700001404181 |

-----

|                     |                 |                     |
|---------------------|-----------------|---------------------|
| CAFE Family ID:9827 |                 |                     |
| ENSFCAG00000001617  | STELLA FRAGMENT | ENSFM00680001305395 |
| ENSFCAG00000026706  | "               | ENSFM00680001305395 |
| ENSFCAG00000026149  | UNKNOWN         | ENSFM00700001402535 |

**Dataset S1.9. Summary of 1-Kbps windows, copy number distribution in control regions and gain/loss cutoffs for the domestic cat (Abyssinian sample)**

**Sequencing**

---

|                       |               |
|-----------------------|---------------|
| Sequencing technology | Illumina      |
| # Reads               | 1,485,609,004 |
| Coverage              | 21.8X         |

**1-Kbps windows**

---

|                       |           |
|-----------------------|-----------|
| # Total windows       | 1,122,501 |
| # Control windows     | 993,102   |
| # Non control windows | 129,399   |

**Gain/loss cutoffs**

---

|                                      |       |
|--------------------------------------|-------|
| Mean copy number in control regions  | 2     |
| StDev copy number in control regions | 0.24  |
| (# windows excluded*)                | 9,932 |
| Gain cutoff                          | 2.71  |
| Loss cutoff                          | 1.29  |

---

\*1-Kbps windows exceeding the 1% highest copy number value

**Dataset S1.10. Summary of duplications and deletions using sample-specific gain/loss cutoffs based on the copy number distribution from the control regions within the domestic cat genome (Abyssinian sample)**

**Duplications**

---

|                               |           |
|-------------------------------|-----------|
| # Duplications                | 85        |
| # Duplications (gaps removed) | 1002      |
| # Bps*                        | 9,065,598 |
| % size of autosomes           | 0.39      |
| # Bps in shared duplications* | 4,377,574 |
| % of duplicated bps           | 48.29     |

**Deletions**

---

|                            |        |
|----------------------------|--------|
| # Deletions                | 1      |
| # Deletions (gaps removed) | 18     |
| # Bps*                     | 54,896 |
| % size of autosomes        | <0.01  |
| # Bps in shared deletions* | 0      |
| % of deleted bps           | 0      |

---

\*All bps are after excluding the size of the gaps (M1 method)

## Dataset S1.11(a). Genes underlying regions of segmental duplications in the domestic cat genome

| Chromosome Name | Gene Start (bp) | Gene End (bp) | Ensembl Gene ID    | Associated Gene Name | Description                                           |
|-----------------|-----------------|---------------|--------------------|----------------------|-------------------------------------------------------|
| A2              | 1999024         | 2024218       | ENSFCAG00000026539 | ZNF77                | zinc finger protein 77                                |
| A2              | 2178186         | 2233965       | ENSFCAG00000026952 |                      |                                                       |
| A2              | 4837081         | 4840788       | ENSFCAG00000022669 |                      |                                                       |
| A2              | 4850030         | 4850775       | ENSFCAG00000027538 |                      |                                                       |
| A2              | 4879236         | 4926614       | ENSFCAG00000005041 |                      |                                                       |
| A2              | 4940497         | 4947843       | ENSFCAG00000024220 |                      |                                                       |
| A2              | 4951852         | 4957168       | ENSFCAG00000024591 |                      |                                                       |
| A2              | 10342173        | 10343114      | ENSFCAG00000027467 |                      |                                                       |
| A2              | 10403957        | 10404904      | ENSFCAG00000024728 |                      |                                                       |
| A2              | 10424192        | 10425154      | ENSFCAG00000026934 |                      |                                                       |
| A2              | 10444212        | 10445147      | ENSFCAG00000028346 |                      |                                                       |
| A2              | 10454027        | 10454932      | ENSFCAG00000026032 |                      |                                                       |
| A2              | 10465336        | 10466262      | ENSFCAG00000030313 |                      |                                                       |
| A2              | 10484879        | 10486405      | ENSFCAG00000030477 |                      |                                                       |
| A2              | 10503936        | 10505982      | ENSFCAG00000022920 |                      |                                                       |
| A2              | 10557343        | 10558290      | ENSFCAG00000031912 |                      |                                                       |
| A2              | 10561828        | 10562778      | ENSFCAG00000029420 |                      |                                                       |
| A2              | 10571496        | 10572431      | ENSFCAG00000030284 |                      |                                                       |
| A2              | 10588491        | 10589447      | ENSFCAG00000027325 |                      |                                                       |
| A2              | 10608719        | 10609642      | ENSFCAG00000029342 |                      |                                                       |
| A2              | 10637607        | 10639184      | ENSFCAG00000025226 |                      |                                                       |
| A2              | 10666812        | 10667738      | ENSFCAG00000026535 |                      |                                                       |
| A2              | 10677429        | 10678364      | ENSFCAG00000027309 | OR7C1                | olfactory receptor, family 7, subfamily C, member 1   |
| A2              | 10691698        | 10693042      | ENSFCAG00000024926 |                      |                                                       |
| A2              | 10735731        | 10736645      | ENSFCAG00000025361 |                      |                                                       |
| A2              | 10749819        | 10750754      | ENSFCAG00000028413 |                      |                                                       |
| A2              | 10774323        | 10775967      | ENSFCAG00000026904 |                      |                                                       |
| A2              | 10802221        | 10803189      | ENSFCAG00000030343 |                      |                                                       |
| A2              | 10811748        | 10813240      | ENSFCAG00000031709 |                      |                                                       |
| A2              | 11305320        | 11311224      | ENSFCAG00000025482 |                      |                                                       |
| A2              | 11312522        | 11362773      | ENSFCAG00000008623 | CYP4F3               | cytochrome P450, family 4, subfamily F, polypeptide 3 |
| A2              | 11380632        | 11382628      | ENSFCAG00000031558 |                      |                                                       |
| A2              | 11390153        | 11391070      | ENSFCAG00000024776 |                      |                                                       |
| A2              | 11408178        | 11409176      | ENSFCAG00000029860 |                      |                                                       |
| A2              | 11427607        | 11428557      | ENSFCAG00000029127 |                      |                                                       |
| A2              | 11444217        | 11445483      | ENSFCAG00000026640 |                      |                                                       |
| A2              | 11454602        | 11455552      | ENSFCAG00000023347 |                      |                                                       |
| A2              | 11469229        | 11470179      | ENSFCAG00000028009 |                      |                                                       |
| A2              | 11478143        | 11479132      | ENSFCAG00000030787 |                      |                                                       |
| A2              | 55532891        | 55578035      | ENSFCAG00000013910 | IQSEC1               | IQ motif and Sec7 domain 1                            |
| A2              | 58451403        | 58575137      | ENSFCAG00000001776 | ALDH1L1              | aldehyde dehydrogenase 1 family, member L1            |
| A2              | 58512851        | 58512965      | ENSFCAG00000020614 | 5S_rRNA              | 5S ribosomal RNA                                      |
| A2              | 156323262       | 156324206     | ENSFCAG00000025442 |                      |                                                       |
| A2              | 156336015       | 156336959     | ENSFCAG00000024190 |                      |                                                       |
| A2              | 157059766       | 157060707     | ENSFCAG00000026036 |                      |                                                       |
| A2              | 157078181       | 157079122     | ENSFCAG00000025223 |                      |                                                       |
| A2              | 162660127       | 162661174     | ENSFCAG00000003990 | GIMAP2               | GTPase, IMAP family member 2                          |
| A2              | 162671690       | 162672605     | ENSFCAG00000031058 |                      |                                                       |
| A2              | 162686216       | 162686593     | ENSFCAG00000027719 |                      |                                                       |
| A2              | 162720551       | 162752217     | ENSFCAG00000011443 |                      |                                                       |
| A3              | 30261827        | 30272148      | ENSFCAG00000025532 |                      |                                                       |
| A3              | 30278131        | 30288600      | ENSFCAG00000030407 |                      |                                                       |
| A3              | 30353317        | 30361064      | ENSFCAG00000001879 |                      |                                                       |
| A3              | 30372145        | 30383790      | ENSFCAG00000031263 |                      |                                                       |
| A3              | 40441218        | 40441327      | ENSFCAG00000024869 | 5S_rRNA              | 5S ribosomal RNA                                      |
| B1              | 40121           | 43236         | ENSFCAG00000019039 |                      |                                                       |
| B1              | 47201           | 48493         | ENSFCAG00000007120 | ZNF781               | zinc finger protein 781                               |
| B1              | 36295742        | 36296780      | ENSFCAG00000023307 |                      |                                                       |
| B2              | 328785          | 331268        | ENSFCAG00000003660 | OR12D2               | olfactory receptor, family 12, subfamily D, member 2  |
| B2              | 713302          | 714237        | ENSFCAG00000011606 |                      |                                                       |
| B2              | 749421          | 750359        | ENSFCAG00000005124 |                      |                                                       |
| B2              | 837074          | 838335        | ENSFCAG00000025316 |                      |                                                       |
| B2              | 884452          | 885396        | ENSFCAG00000030837 |                      |                                                       |

## Dataset S1.11(b). Genes underlying regions of segmental duplications in the domestic cat genome

| Chromosome Name | Gene Start (bp) | Gene End (bp) | Ensembl Gene ID    | Associated Gene Name | Description                                                                                               |
|-----------------|-----------------|---------------|--------------------|----------------------|-----------------------------------------------------------------------------------------------------------|
| B2              | 906325          | 906436        | ENSFCAG00000027033 | 5S_rRNA              | 5S ribosomal RNA                                                                                          |
| B2              | 916798          | 917733        | ENSFCAG00000023506 |                      |                                                                                                           |
| B2              | 977120          | 979761        | ENSFCAG00000026047 |                      |                                                                                                           |
| B2              | 1060434         | 1061724       | ENSFCAG00000028748 |                      |                                                                                                           |
| B2              | 1085480         | 1086424       | ENSFCAG00000030186 |                      |                                                                                                           |
| B2              | 1104867         | 1106243       | ENSFCAG00000000501 | OR2B3                | olfactory receptor, family 2, subfamily B, member 3                                                       |
| B2              | 1129129         | 1130064       | ENSFCAG00000023353 |                      |                                                                                                           |
| B2              | 1140538         | 1144027       | ENSFCAG00000028271 |                      |                                                                                                           |
| B2              | 1230045         | 1231165       | ENSFCAG00000028202 |                      |                                                                                                           |
| B2              | 1243051         | 1243163       | ENSFCAG00000029309 | 5S_rRNA              | 5S ribosomal RNA                                                                                          |
| B2              | 1257504         | 1257616       | ENSFCAG00000028666 | 5S_rRNA              | 5S ribosomal RNA                                                                                          |
| B2              | 1277229         | 1278164       | ENSFCAG00000028799 |                      |                                                                                                           |
| B2              | 1343658         | 1344622       | ENSFCAG00000025334 |                      |                                                                                                           |
| B2              | 1353504         | 1357463       | ENSFCAG00000029693 |                      |                                                                                                           |
| B2              | 1459936         | 1460865       | ENSFCAG00000010634 | OR2W1                | olfactory receptor, family 2, subfamily W, member 1                                                       |
| B2              | 2299340         | 2300272       | ENSFCAG00000026697 |                      |                                                                                                           |
| B2              | 2322927         | 2323862       | ENSFCAG00000029062 |                      |                                                                                                           |
| B2              | 2332065         | 2348095       | ENSFCAG00000028781 |                      |                                                                                                           |
| B2              | 2364168         | 2365106       | ENSFCAG00000023042 |                      |                                                                                                           |
| B2              | 2374024         | 2374136       | ENSFCAG00000030916 | 5S_rRNA              | 5S ribosomal RNA                                                                                          |
| B2              | 2398409         | 2399350       | ENSFCAG00000027883 |                      |                                                                                                           |
| B2              | 2437587         | 2438525       | ENSFCAG00000023744 |                      |                                                                                                           |
| B2              | 2529387         | 2530319       | ENSFCAG00000030548 |                      |                                                                                                           |
| B2              | 2539008         | 2539946       | ENSFCAG00000025071 |                      |                                                                                                           |
| B2              | 32597800        | 32602576      | ENSFCAG00000021900 |                      |                                                                                                           |
| B2              | 32667396        | 32670292      | ENSFCAG00000000629 | FLA-Z                | MHC class I antigen                                                                                       |
| B2              | 32703681        | 32706770      | ENSFCAG00000027223 |                      |                                                                                                           |
| B2              | 32774101        | 32776385      | ENSFCAG00000015379 |                      |                                                                                                           |
| B2              | 32835681        | 32838540      | ENSFCAG00000000877 |                      |                                                                                                           |
| B2              | 32870997        | 32871109      | ENSFCAG00000027024 | 5S_rRNA              | 5S ribosomal RNA                                                                                          |
| B2              | 32907635        | 32910483      | ENSFCAG00000018113 |                      |                                                                                                           |
| B2              | 32945158        | 32948534      | ENSFCAG00000027242 | FLA-I                | MHC class I antigen precursor                                                                             |
| B2              | 33007185        | 33013570      | ENSFCAG00000022105 |                      |                                                                                                           |
| B3              | 148227485       | 148229683     | ENSFCAG00000025368 |                      |                                                                                                           |
| B3              | 148232277       | 148232726     | ENSFCAG00000028661 |                      |                                                                                                           |
| B3              | 148259497       | 148259934     | ENSFCAG00000025324 |                      |                                                                                                           |
| B3              | 148322272       | 148322384     | ENSFCAG00000031776 | 5S_rRNA              | 5S ribosomal RNA                                                                                          |
| B4              | 24696117        | 24799719      | ENSFCAG00000014236 | ANKRD26              | ankyrin repeat domain 26                                                                                  |
| B4              | 24819736        | 24859130      | ENSFCAG00000027161 | RAB18                | RAB18, member RAS oncogene family                                                                         |
| B4              | 46929808        | 46931537      | ENSFCAG00000013935 |                      |                                                                                                           |
| B4              | 46958758        | 46960567      | ENSFCAG00000030370 |                      |                                                                                                           |
| D1              | 4486594         | 4486706       | ENSFCAG00000022937 | 5S_rRNA              | 5S ribosomal RNA                                                                                          |
| D1              | 4776114         | 4776224       | ENSFCAG00000030025 | 5S_rRNA              | 5S ribosomal RNA                                                                                          |
| D1              | 4803021         | 4803133       | ENSFCAG00000025220 | 5S_rRNA              | 5S ribosomal RNA                                                                                          |
| D1              | 20649778        | 20650728      | ENSFCAG00000029628 |                      |                                                                                                           |
| D1              | 21354029        | 21355006      | ENSFCAG00000002614 |                      |                                                                                                           |
| D1              | 21380576        | 21381508      | ENSFCAG00000008131 | OR8B12               | olfactory receptor, family 8, subfamily B, member 12                                                      |
| D1              | 64918054        | 64918998      | ENSFCAG00000025048 |                      |                                                                                                           |
| D1              | 64938061        | 64939629      | ENSFCAG00000028751 |                      |                                                                                                           |
| D1              | 66883484        | 66884427      | ENSFCAG00000024203 |                      |                                                                                                           |
| D1              | 66892866        | 66893789      | ENSFCAG00000000727 | OR10A3               | olfactory receptor, family 10, subfamily A, member 3                                                      |
| D1              | 66908368        | 66909313      | ENSFCAG00000028608 |                      |                                                                                                           |
| D1              | 87753796        | 88005871      | ENSFCAG00000030334 | ELP4                 | elongator acetyltransferase complex subunit 4                                                             |
| D1              | 88012047        | 88025138      | ENSFCAG00000007094 | PAX6                 | paired box 6                                                                                              |
| D1              | 102240555       | 102241478     | ENSFCAG00000001814 |                      |                                                                                                           |
| D1              | 102283570       | 102284514     | ENSFCAG00000024648 |                      |                                                                                                           |
| D1              | 102337235       | 102338164     | ENSFCAG00000014680 | OR4A47               | olfactory receptor, family 4, subfamily A, member 47                                                      |
| D1              | 103550482       | 103551426     | ENSFCAG00000028369 |                      |                                                                                                           |
| D1              | 103568480       | 103569423     | ENSFCAG00000024411 |                      |                                                                                                           |
| D1              | 113601303       | 113688582     | ENSFCAG00000004765 | PPFIA1               | protein tyrosine phosphatase, receptor type, f polypeptide (PTPRF), interacting protein (liprin), alpha 1 |
| D2              | 129076          | 129188        | ENSFCAG00000029175 | 5S_rRNA              | 5S ribosomal RNA                                                                                          |
| D2              | 8749213         | 9075406       | ENSFCAG00000029000 |                      |                                                                                                           |
| D2              | 8960580         | 8980244       | ENSFCAG00000023704 |                      |                                                                                                           |
| D2              | 20153518        | 20206464      | ENSFCAG00000023459 | TTC13                | tetratricopeptide repeat domain 13                                                                        |



## Dataset S1.11(c). Genes underlying regions of segmental duplications in the domestic cat genome

| Chromosome Name | Gene Start (bp) | Gene End (bp) | Ensembl Gene ID    | Associated Gene Name | Description                                                |
|-----------------|-----------------|---------------|--------------------|----------------------|------------------------------------------------------------|
| D2              | 22330902        | 22331016      | ENSFCAG00000027550 | 5S_rRNA              | 5S ribosomal RNA                                           |
| D2              | 22332106        | 22332224      | ENSFCAG00000029290 | 5S_rRNA              | 5S ribosomal RNA                                           |
| D2              | 22333313        | 22333421      | ENSFCAG00000017601 | 5S_rRNA              | 5S ribosomal RNA                                           |
| D2              | 22367720        | 22368642      | ENSFCAG00000028109 |                      |                                                            |
| D2              | 22379806        | 22380681      | ENSFCAG00000011440 |                      |                                                            |
| D2              | 89795938        | 89805869      | ENSFCAG00000013762 | CYP2E2               | cytochrome P450 2E2                                        |
| D2              | 89809103        | 89814632      | ENSFCAG00000031109 | ZNF717               | zinc finger protein 717                                    |
| D2              | 89817222        | 89822044      | ENSFCAG00000013763 | SYCE1                | synaptonemal complex central element protein 1             |
| D3              | 80759           | 80867         | ENSFCAG00000021705 | 5S_rRNA              | 5S ribosomal RNA                                           |
| D3              | 23225438        | 23225981      | ENSFCAG00000025218 |                      |                                                            |
| D3              | 23273316        | 23273795      | ENSFCAG00000026724 |                      |                                                            |
| D3              | 23297965        | 23298282      | ENSFCAG00000025197 |                      |                                                            |
| D3              | 23382135        | 23382440      | ENSFCAG00000029689 |                      |                                                            |
| D3              | 23419057        | 23419488      | ENSFCAG00000023616 |                      |                                                            |
| D3              | 23509526        | 23510019      | ENSFCAG00000031794 |                      |                                                            |
| D3              | 26658713        | 26658825      | ENSFCAG00000027766 | 5S_rRNA              | 5S ribosomal RNA                                           |
| D3              | 26681356        | 26709785      | ENSFCAG00000006400 | PIWIL3               | piwi-like RNA-mediated gene silencing 3                    |
| D3              | 28148397        | 28167337      | ENSFCAG00000005999 | MED15                | mediator complex subunit 15                                |
| D3              | 28167822        | 28174177      | ENSFCAG00000030668 |                      |                                                            |
| D3              | 28235497        | 28244430      | ENSFCAG00000006009 | P2RX6                | purinergic receptor P2X, ligand-gated ion channel, 6       |
| D3              | 28280102        | 28284449      | ENSFCAG00000022091 | TUBA3E               | tubulin, alpha 3e                                          |
| D4              | 7198            | 11817         | ENSFCAG00000029042 |                      |                                                            |
| D4              | 88592476        | 88595451      | ENSFCAG00000023879 |                      |                                                            |
| D4              | 88654911        | 88657790      | ENSFCAG00000001496 |                      |                                                            |
| D4              | 88692182        | 88695035      | ENSFCAG00000027840 |                      |                                                            |
| D4              | 88712762        | 88715537      | ENSFCAG00000031788 |                      |                                                            |
| D4              | 95006881        | 95010017      | ENSFCAG00000012216 |                      |                                                            |
| D4              | 95011716        | 95016678      | ENSFCAG00000012219 |                      |                                                            |
| E1              | 2184            | 3160          | ENSFCAG00000008583 |                      |                                                            |
| E1              | 42029674        | 42032124      | ENSFCAG00000030823 |                      |                                                            |
| E1              | 56288309        | 56290286      | ENSFCAG00000023215 |                      |                                                            |
| E1              | 56322164        | 56324255      | ENSFCAG00000030685 |                      |                                                            |
| E1              | 56334152        | 56334460      | ENSFCAG00000001618 |                      |                                                            |
| E1              | 56382117        | 56385015      | ENSFCAG00000029475 |                      |                                                            |
| E2              | 4520136         | 4522367       | ENSFCAG00000023824 |                      |                                                            |
| E2              | 4673182         | 4688006       | ENSFCAG00000028391 |                      |                                                            |
| E2              | 4739276         | 4739981       | ENSFCAG00000016263 |                      |                                                            |
| E2              | 4893549         | 4895709       | ENSFCAG00000025435 |                      |                                                            |
| E2              | 4950706         | 4951646       | ENSFCAG00000030225 |                      |                                                            |
| E2              | 4960706         | 4962448       | ENSFCAG00000024112 |                      |                                                            |
| E2              | 5330162         | 5331094       | ENSFCAG00000025619 | FELCATV1R6           | vomer nasal 1 receptor felCatV1R6                          |
| E2              | 5360235         | 5361671       | ENSFCAG00000023132 |                      |                                                            |
| E2              | 5412456         | 5420577       | ENSFCAG00000023403 |                      |                                                            |
| E2              | 5480972         | 5529785       | ENSFCAG00000023819 |                      |                                                            |
| E2              | 5486927         | 5492030       | ENSFCAG00000029493 |                      |                                                            |
| E2              | 5537527         | 5537593       | ENSFCAG00000017968 |                      |                                                            |
| E2              | 5564448         | 5571174       | ENSFCAG00000031161 |                      |                                                            |
| E2              | 5604920         | 5606596       | ENSFCAG00000025806 |                      |                                                            |
| E2              | 5641792         | 5645484       | ENSFCAG00000023019 |                      |                                                            |
| E2              | 5712974         | 5714008       | ENSFCAG00000028544 |                      |                                                            |
| E2              | 5880689         | 5881638       | ENSFCAG00000025070 |                      |                                                            |
| E2              | 5887792         | 5888197       | ENSFCAG00000028057 |                      |                                                            |
| E2              | 5918068         | 5919030       | ENSFCAG00000022670 | FELCATV1R7           | vomer nasal 1 receptor felCatV1R7                          |
| E2              | 8497229         | 8501013       | ENSFCAG00000007363 |                      |                                                            |
| E2              | 8513256         | 8529986       | ENSFCAG00000022344 | FUT2                 | fucosyltransferase 2 (secretor status included)            |
| E2              | 8515155         | 8527136       | ENSFCAG00000027085 |                      |                                                            |
| E2              | 12316795        | 12325442      | ENSFCAG00000029888 | CEACAM21             | carcinoembryonic antigen-related cell adhesion molecule 21 |
| E2              | 13122830        | 13132919      | ENSFCAG00000013094 | CYP2S1               | cytochrome P450, family 2, subfamily S, polypeptide 1      |
| E3              | 26876172        | 26876284      | ENSFCAG00000029594 | 5S_rRNA              | 5S ribosomal RNA                                           |
| E3              | 26994957        | 27039168      | ENSFCAG00000008109 | ACSM1                | acyl-CoA synthetase medium-chain family member 1           |
| E3              | 32693517        | 33115346      | ENSFCAG00000010119 | SNX29                | sorting nexin 29                                           |

**Dataset S1.12. Pathway enrichment results using all genes underlying regions of segmental duplications in the domestic cat genome (Abyssinian sample)**

| KEGG Pathway                                                                                                                                                                                                                                                                                                                                                                                                                                                                                                                                                                 | Pathway ID | C    | O | E    | R     | rawP     | adjP     | Genes                                               |
|------------------------------------------------------------------------------------------------------------------------------------------------------------------------------------------------------------------------------------------------------------------------------------------------------------------------------------------------------------------------------------------------------------------------------------------------------------------------------------------------------------------------------------------------------------------------------|------------|------|---|------|-------|----------|----------|-----------------------------------------------------|
| Olfactory transduction                                                                                                                                                                                                                                                                                                                                                                                                                                                                                                                                                       | 4740       | 388  | 7 | 0.27 | 25.94 | 7.7E-09  | 1.54E-08 | OR4A47, OR7C1, OR8B12, OR10A3, OR12D2, OR2W1, OR2B3 |
| Metabolic pathways                                                                                                                                                                                                                                                                                                                                                                                                                                                                                                                                                           | 1100       | 1130 | 3 | 0.79 | 3.82  | 0.0431   | 0.0431   | FUT2, CYP4F3, ACSM1                                 |
| <b>Wikipathways Pathway</b>                                                                                                                                                                                                                                                                                                                                                                                                                                                                                                                                                  |            |      |   |      |       |          |          |                                                     |
| GPCRs, Class A Rhodopsin-like                                                                                                                                                                                                                                                                                                                                                                                                                                                                                                                                                | WP455      | 259  | 3 | 0.18 | 16.65 | 0.0008   | 0.0014   | OR7C1, OR2W1, OR2B3                                 |
| cytochrome P450                                                                                                                                                                                                                                                                                                                                                                                                                                                                                                                                                              | WP43       | 65   | 2 | 0.05 | 44.23 | 0.0009   | 0.0014   | CYP2S1, CYP4F3                                      |
| <b>GO Category (Sub-root)</b>                                                                                                                                                                                                                                                                                                                                                                                                                                                                                                                                                |            |      |   |      |       |          |          |                                                     |
| olfactory receptor activity (molecular function)                                                                                                                                                                                                                                                                                                                                                                                                                                                                                                                             | GO:0004984 | 419  | 7 | 0.71 | 9.82  | 4.64E-06 | 0.0003   | OR4A47, OR7C1, OR8B12, OR10A3, OR12D2, OR2W1, OR2B3 |
| guanyl nucleotide binding (molecular function)                                                                                                                                                                                                                                                                                                                                                                                                                                                                                                                               | GO:0019001 | 392  | 4 | 0.67 | 6     | 0.0041   | 0.023    | RAB18, TUBA3E, ACSM1, GIMAP2                        |
| <p><b>USER DATA &amp; PARAMETERS</b> - N = 35 genes submitted, Genes mapped to unique Entrez Gene IDs: 33, Organism: hsapiens, Id Type: gene_symbol, Ref Set: entrezgene, Significance Level: .05, Statistics Test: Hypergeometric, MTC: BH, Minimum: 2</p> <p><b>COLUMN HEADINGS</b> - number of reference genes in the category (C), number of genes in the gene set and also in the category (O), expected number in the category (E), Ratio of enrichment (R), p value from hypergeometric test (rawP), and p value adjusted by the multiple test adjustment (adjP).</p> |            |      |   |      |       |          |          |                                                     |
