# Supplementary material
Source: PubMed Central journal article supplement (PMC4260561)
Supplement: pnas.1410083111.sd02.pdf [file pnas.1410083111.sd02.pdf]

### Dataset S2.1. Coverage statistics per pool.

| Breed                   | Individuals | Sequence Depth<br>(All Chromosomes) | Sequence Depth<br>(Autosomes) | Properly Paired Reads |
|-------------------------|-------------|-------------------------------------|-------------------------------|-----------------------|
| Abyssinian              | 1           | 20.39                               | 20.43                         | 208,102,582           |
| Egyptian Mau            | 1           | 4.97                                | 4.96                          | 93,318,282            |
| Maine Coon              | 5           | 10.52                               | 10.65                         | 271,512,388           |
| Norwegian Forest        | 4           | 14.89                               | 15.02                         | 258,851,848           |
| Birman                  | 4           | 3.86                                | 3.92                          | 163,585,510           |
| Japanese Bobtail        | 4           | 11.09                               | 11.26                         | 384,722,308           |
| Turkish Van             | 4           | 9.26                                | 9.38                          | 405,812,058           |
| Pooled Breeds           | Total = 22  | Mean = 9.1<br>Pooled = 54.57        | Mean = 9.2<br>Pooled = 55.18  | Total = 1,577,802,394 |
| <i>Felis silvestris</i> | 4           | 6.84                                | 7.02                          | 189,543,907           |

**Dataset S2.2(a). Genes underlying regions of low  $H_p$  in the pooled domestic cat variant dataset following annotation of 100kb windows that fell below four standard deviations from the mean  $H_p$**

| Chromosome Name | Gene Start (bp) | Gene End (bp) | Ensembl Gene ID      | Associated Gene Name | Description                                                                                      | Overlap With FST List |
|-----------------|-----------------|---------------|----------------------|----------------------|--------------------------------------------------------------------------------------------------|-----------------------|
| A1              | 8396110         | 8766675       | ENSFCAG00000014322   | MTUS2                | microtubule associated tumor suppressor candidate 2                                              |                       |
| A1              | 8776308         | 8797912       | ENSFCAG00000014326   | SLC7A1               | solute carrier family 7 (cationic amino acid transporter, y+ system), member 1                   |                       |
| A1              | 40039128        | 40039239      | ENSFCAG000000023540  | 5S_rRNA              | 5S ribosomal RNA                                                                                 |                       |
| A1              | 52410273        | 52410385      | ENSFCAG000000028097  | 5S_rRNA              | 5S ribosomal RNA                                                                                 |                       |
| A1              | 52479995        | 52528867      | ENSFCAG00000000561   | RBM26                | RNA binding motif protein 26                                                                     |                       |
| A1              | 52625952        | 52688765      | ENSFCAG000000025797  | NDFIP2               | Nedd4 family interacting protein 2                                                               |                       |
| A1              | 84103052        | 84104082      | ENSFCAG00000015576   |                      |                                                                                                  |                       |
| A1              | 84167672        | 84168631      | ENSFCAG000000022722  |                      |                                                                                                  |                       |
| A1              | 84208569        | 84209522      | ENSFCAG000000031931  |                      |                                                                                                  |                       |
| A1              | 88361081        | 88362067      | ENSFCAG000000026872  | OR2G3                | olfactory receptor, family 2, subfamily G, member 3                                              |                       |
| A1              | 88391241        | 88392229      | ENSFCAG000000008196  |                      |                                                                                                  |                       |
| A1              | 88521633        | 88522592      | ENSFCAG000000002236  | OR2C3                | olfactory receptor, family 2, subfamily C, member 3                                              |                       |
| A1              | 88551982        | 88552917      | ENSFCAG000000024148  |                      |                                                                                                  |                       |
| A1              | 88616973        | 88617956      | ENSFCAG000000021910  |                      |                                                                                                  |                       |
| A1              | 88647235        | 88648721      | ENSFCAG000000008976  |                      |                                                                                                  |                       |
| A1              | 88667669        | 88668640      | ENSFCAG00000010456   | OR2B11               | olfactory receptor, family 2, subfamily B, member 11                                             |                       |
| A1              | 88708791        | 88709744      | ENSFCAG0000000031962 |                      |                                                                                                  |                       |
| A1              | 88723599        | 88774919      | ENSFCAG000000009344  | NLRP3                | NLR family, pyrin domain containing 3                                                            |                       |
| A1              | 89064612        | 89073091      | ENSFCAG0000000023784 |                      |                                                                                                  |                       |
| A1              | 89091044        | 89092033      | ENSFCAG000000006397  | RNF187               | ring finger protein 187                                                                          |                       |
| A1              | 89124037        | 89124141      | ENSFCAG0000000042726 | 5S_rRNA              | 5S ribosomal RNA                                                                                 |                       |
| A1              | 89136000        | 89136365      | ENSFCAG000000024427  |                      |                                                                                                  |                       |
| A1              | 89140926        | 89141306      | ENSFCAG000000032040  | HIST3H2BB            | histone cluster 3, H2bb                                                                          |                       |
| A1              | 89141619        | 89142011      | ENSFCAG000000024530  | HIST3H2A             | histone cluster 3, H2a                                                                           |                       |
| A1              | 89163922        | 89164322      | ENSFCAG000000006396  |                      |                                                                                                  |                       |
| A1              | 89176315        | 89184314      | ENSFCAG0000000029709 | TRIM17               | tripartite motif containing 17                                                                   |                       |
| A1              | 89187378        | 89192375      | ENSFCAG0000000028702 | TRIM11               | tripartite motif containing 11                                                                   |                       |
| A1              | 89211477        | 89214157      | ENSFCAG0000000025004 |                      |                                                                                                  |                       |
| A1              | 89215471        | 89216301      | ENSFCAG0000000023698 |                      |                                                                                                  |                       |
| A1              | 89216810        | 89218801      | ENSFCAG0000000022817 |                      |                                                                                                  |                       |
| A1              | 89227536        | 89243984      | ENSFCAG0000000030432 |                      |                                                                                                  |                       |
| A1              | 89246495        | 89247270      | ENSFCAG0000000025517 |                      |                                                                                                  |                       |
| A1              | 95458053        | 95465888      | ENSFCAG0000000031517 |                      |                                                                                                  |                       |
| A1              | 95498785        | 95504740      | ENSFCAG0000000030457 |                      |                                                                                                  |                       |
| A1              | 95525507        | 95744069      | ENSFCAG0000000025195 | COMMD10              | COMM domain containing 10                                                                        |                       |
| A1              | 117462646       | 117535510     | ENSFCAG000000022810  | PCDH1A1              | protocadherin alpha 1                                                                            | X                     |
| A1              | 117574779       | 117620293     | ENSFCAG000000003685  | PCDHAC2              | protocadherin alpha subfamily C, 2                                                               |                       |
| A1              | 117653631       | 117656087     | ENSFCAG000000003687  | PCDHB1               | protocadherin beta 1                                                                             |                       |
| A1              | 117675941       | 117678295     | ENSFCAG000000001367  | PCDHB2               | protocadherin beta 2                                                                             |                       |
| A1              | 117694636       | 117729173     | ENSFCAG000000013156  | PCDHB4               | protocadherin beta 4                                                                             | X                     |
| A1              | 124586618       | 124647903     | ENSFCAG000000025994  | SLC38A9              | solute carrier family 38, member 9                                                               |                       |
| A1              | 124685687       | 124778148     | ENSFCAG000000012560  | DDX4                 | DEAD (Asp-Glu-Ala-Asp) box polypeptide 4                                                         |                       |
| A1              | 124828501       | 124867387     | ENSFCAG000000010857  | IL31RA               | interleukin 31 receptor A                                                                        |                       |
| A1              | 124892755       | 124943980     | ENSFCAG000000010859  | IL6ST                | interleukin 6 signal transducer (gp130, oncostatin M receptor)                                   |                       |
| A1              | 125019663       | 125086857     | ENSFCAG000000010860  | ANKRD55              | ankyrin repeat domain 55                                                                         |                       |
| A1              | 182239426       | 182624612     | ENSFCAG000000008547  | EBF1                 | early B-cell factor 1                                                                            |                       |
| A1              | 182675442       | 182769870     | ENSFCAG000000012160  |                      |                                                                                                  |                       |
| A1              | 182768748       | 182791531     | ENSFCAG000000026371  | UBLCP1               | ubiquitin-like domain containing CTD phosphatase 1                                               |                       |
| A1              | 182815541       | 182825071     | ENSFCAG000000015571  | IL12B                | Interleukin-12 subunit beta                                                                      |                       |
| A1              | 192916759       | 193132695     | ENSFCAG000000014984  | GALNT10              | UDP-N-acetyl-alpha-D-galactosamine:polypeptide N-acetylgalactosaminyltransferase 10 (GalNAc-T10) |                       |
| A1              | 193168465       | 193168577     | ENSFCAG000000026163  | 5S_rRNA              | 5S ribosomal RNA                                                                                 | X                     |
| A1              | 193262073       | 193280914     | ENSFCAG000000028091  | MFAP3                | microfibrillar-associated protein 3                                                              | X                     |
| A1              | 193286712       | 193315803     | ENSFCAG000000023708  | FAM114A2             | family with sequence similarity 114, member A2                                                   | X                     |
| A1              | 193479446       | 193624866     | ENSFCAG000000005223  | GRIA1                | glutamate receptor, ionotropic, AMPA 1                                                           | X                     |
| A1              | 219080923       | 219081031     | ENSFCAG000000027389  | 5S_rRNA              | 5S ribosomal RNA                                                                                 |                       |
| A2              | 110372750       | 110413021     | ENSFCAG000000005018  | AHR                  | aryl hydrocarbon receptor                                                                        |                       |
| A2              | 110810088       | 110898682     | ENSFCAG0000000024117 | SNX13                | sorting nexin 13                                                                                 |                       |
| A3              | 24313334        | 24397487      | ENSFCAG000000002305  | PIGU                 | phosphatidylinositol glycan anchor biosynthesis, class U                                         |                       |
| A3              | 24398183        | 24399185      | ENSFCAG0000000022040 | MAP1LC3A             | microtubule-associated protein 1 light chain 3 alpha                                             |                       |
| A3              | 24418275        | 24429758      | ENSFCAG000000002304  | DYNLRB1              | dynein, light chain, roadblock-type 1                                                            |                       |
| A3              | 24443756        | 24584348      | ENSFCAG000000008780  | ITCH                 | itchy E3 ubiquitin protein ligase                                                                |                       |
| A3              | 24642489        | 24656544      | ENSFCAG000000007301  |                      |                                                                                                  |                       |
| A3              | 24671683        | 24676154      | ENSFCAG000000011037  | ASIP                 | Agouti-signaling protein                                                                         |                       |
| A3              | 50153794        | 50156025      | ENSFCAG0000000030154 |                      |                                                                                                  |                       |
| A3              | 50157809        | 50158123      | ENSFCAG0000000027566 |                      |                                                                                                  |                       |
| A3              | 50222873        | 50229392      | ENSFCAG0000000022966 |                      |                                                                                                  |                       |
| A3              | 76497901        | 76527797      | ENSFCAG000000003522  | CCDC104              | coiled-coil domain containing 104                                                                |                       |
| A3              | 76529028        | 76595389      | ENSFCAG0000000026457 | SMEK2                | SMEK homolog 2, suppressor of mek1 (Dictyostelium)                                               |                       |
| A3              | 76618801        | 76664057      | ENSFCAG000000013236  | PNPT1                | polyribonucleotide nucleotidyltransferase 1                                                      |                       |
| A3              | 96863689        | 96865875      | ENSFCAG000000024660  |                      |                                                                                                  |                       |

**Dataset S2.2(b). Genes underlying regions of low  $H_p$  in the pooled domestic cat variant dataset following annotation of 100kb windows that fell below four standard deviations from the mean  $H_p$**

| Chromosome Name | Gene Start (bp) | Gene End (bp) | Ensembl Gene ID      | Associated Gene Name | Description                                                                                    | Overlap With F <sub>ST</sub> List |
|-----------------|-----------------|---------------|----------------------|----------------------|------------------------------------------------------------------------------------------------|-----------------------------------|
| A3              | 96889747        | 96889859      | ENSFCAG00000028765   | 5S_rRNA              | 5S ribosomal RNA                                                                               |                                   |
| A3              | 96900604        | 96902810      | ENSFCAG00000027440   |                      |                                                                                                |                                   |
| A3              | 126610231       | 126619976     | ENSFCAG00000028084   |                      |                                                                                                |                                   |
| A3              | 126698895       | 126761424     | ENSFCAG00000027520   | PUM2                 | pumilio homolog 2 (Drosophila)                                                                 |                                   |
| A3              | 126775239       | 126796393     | ENSFCAG00000005354   | SDC1                 | syndecan 1                                                                                     |                                   |
| A3              | 141321118       | 141464325     | ENSFCAG00000013984   | MYT1L                | myelin transcription factor 1-like                                                             |                                   |
| B1              | 44313905        | 44415983      | ENSFCAG000000031578  |                      |                                                                                                |                                   |
| B1              | 44440898        | 44568664      | ENSFCAG00000000589   |                      |                                                                                                |                                   |
| B1              | 44593908        | 44639323      | ENSFCAG000000030919  |                      |                                                                                                |                                   |
| B1              | 44605069        | 44605181      | ENSFCAG000000031785  | 5S_rRNA              | 5S ribosomal RNA                                                                               |                                   |
| B1              | 44691591        | 44732046      | ENSFCAG000000028945  |                      |                                                                                                |                                   |
| B1              | 44746128        | 44770572      | ENSFCAG000000028120  |                      |                                                                                                |                                   |
| B1              | 44774622        | 44784782      | ENSFCAG000000023569  |                      |                                                                                                |                                   |
| B1              | 44792973        | 44919764      | ENSFCAG00000002595   | ADAM9                | ADAM metallopeptidase domain 9                                                                 |                                   |
| B1              | 44794749        | 44795624      | ENSFCAG000000002701  |                      |                                                                                                |                                   |
| B1              | 44920372        | 44925151      | ENSFCAG000000002593  | TM2D2                | TM2 domain containing 2                                                                        |                                   |
| B1              | 44928099        | 44938386      | ENSFCAG000000002591  | HTRA4                | Htra serine peptidase 4                                                                        |                                   |
| B1              | 44938751        | 44984295      | ENSFCAG000000030276  | PLEKHA2              | pleckstrin homology domain containing, family A (phosphoinositide binding specific) member 2   |                                   |
| B1              | 45043315        | 45101607      | ENSFCAG000000024992  | TACC1                | transforming, acidic coiled-coil containing protein 1                                          |                                   |
| B1              | 104880577       | 104998796     | ENSFCAG000000010364  | PDE5A                | cGMP-specific 3',5'-cyclic phosphodiesterase                                                   |                                   |
| B1              | 105033096       | 105036707     | ENSFCAG000000026257  | FABP2                | fatty acid binding protein 2, intestinal                                                       |                                   |
| B1              | 105069890       | 105121855     | ENSFCAG000000014472  | USP53                | ubiquitin specific peptidase 53                                                                |                                   |
| B1              | 105153960       | 105193563     | ENSFCAG000000003007  | MYOZ2                | myozenin 2                                                                                     |                                   |
| B1              | 105252135       | 105424698     | ENSFCAG000000028738  | SYNPO2               | synaptopodin 2                                                                                 |                                   |
| B1              | 143593440       | 143685242     | ENSFCAG000000010427  | CCDC158              | coiled-coil domain containing 158                                                              |                                   |
| B1              | 172072490       | 172152353     | ENSFCAG000000003209  |                      |                                                                                                |                                   |
| B1              | 172191715       | 172262048     | ENSFCAG000000025531  | UBE2K                | ubiquitin-conjugating enzyme E2K                                                               |                                   |
| B1              | 191450950       | 191588878     | ENSFCAG000000029474  | LCORL                | ligand dependent nuclear receptor corepressor-like                                             |                                   |
| B1              | 191619013       | 191665923     | ENSFCAG000000030778  | NCAPG                | non-SMC condensin I complex, subunit G                                                         |                                   |
| B2              | 82062518        | 82106450      | ENSFCAG000000030695  |                      |                                                                                                |                                   |
| B2              | 82129137        | 82129462      | ENSFCAG000000022894  |                      |                                                                                                |                                   |
| B2              | 82190939        | 82198755      | ENSFCAG000000029256  | SRSF12               | serine/arginine-rich splicing factor 12                                                        |                                   |
| B2              | 82233859        | 82249448      | ENSFCAG000000014224  | PM20D2               | peptidase M20 domain containing 2                                                              |                                   |
| B2              | 82263854        | 82290954      | ENSFCAG000000022082  | GABRR1               | gamma-aminobutyric acid (GABA) A receptor, rho 1                                               |                                   |
| B3              | 18642298        | 18719149      | ENSFCAG000000007543  | CERS3                | ceramide synthase 3                                                                            |                                   |
| B3              | 33511989        | 33516370      | ENSFCAG000000000344  | CYP1A2               | Cytochrome P450 1A2                                                                            | X                                 |
| B3              | 33532067        | 33538470      | ENSFCAG000000002016  | CYP1A1               | Cytochrome P450 1A1                                                                            | X                                 |
| B3              | 33564717        | 33611587      | ENSFCAG000000002014  | EDC3                 | enhancer of mRNA decapping 3 homolog (S. cerevisiae)                                           | X                                 |
| B3              | 33611037        | 33628940      | ENSFCAG0000000031747 | CLK3                 | CDC-like kinase 3                                                                              | X                                 |
| B3              | 33648267        | 33702607      | ENSFCAG000000002012  | ARID3B               | AT rich interactive domain 3B (BRIGHT-like)                                                    | X                                 |
| B3              | 33785369        | 33799296      | ENSFCAG0000000027852 | UBL7                 | ubiquitin-like 7 (bone marrow stromal cell-derived)                                            |                                   |
| B3              | 33820675        | 33830309      | ENSFCAG0000000008142 | SEMA7A               | semaphorin 7A, GPI membrane anchor (John Milton Hagen blood group)                             |                                   |
| B3              | 93427038        | 93427596      | ENSFCAG0000000023471 |                      |                                                                                                |                                   |
| B3              | 111258215       | 111397325     | ENSFCAG0000000014176 | PPP2R5E              | protein phosphatase 2, regulatory subunit B', epsilon isoform                                  |                                   |
| B3              | 111427724       | 111428887     | ENSFCAG0000000025276 | WDR89                | WD repeat domain 89                                                                            |                                   |
| B3              | 111434101       | 111434478     | ENSFCAG0000000029391 |                      |                                                                                                |                                   |
| B3              | 111477502       | 111477894     | ENSFCAG0000000013027 |                      |                                                                                                |                                   |
| B3              | 111505184       | 111540616     | ENSFCAG0000000031669 | SGPP1                | sphingosine-1-phosphate phosphatase 1                                                          |                                   |
| B3              | 114616480       | 114684401     | ENSFCAG0000000011076 | MPP5                 | membrane protein, palmitoylated 5 (MAGUK p55 subfamily member 5)                               |                                   |
| B3              | 114689401       | 114711272     | ENSFCAG0000000011078 | ATP6V1D              | ATPase, H+ transporting, lysosomal 34kDa, V1 subunit D                                         |                                   |
| B3              | 114715814       | 114732784     | ENSFCAG0000000031891 | EIF2S1               | eukaryotic translation initiation factor 2, subunit 1 alpha, 35kDa                             |                                   |
| B3              | 114733231       | 114742902     | ENSFCAG0000000011080 | PLEK2                | pleckstrin 2                                                                                   |                                   |
| B3              | 114809050       | 114809553     | ENSFCAG0000000031183 | TMEM229B             | transmembrane protein 229B                                                                     |                                   |
| B3              | 114877701       | 114926189     | ENSFCAG0000000014084 | PLEKHH1              | pleckstrin homology domain containing, family H (with MyTH4 domain) member 1                   | X                                 |
| B4              | 39020791        | 39064360      | ENSFCAG0000000029824 | AKAP3                | A kinase (PRKA) anchor protein 3                                                               |                                   |
| B4              | 39067047        | 39103662      | ENSFCAG0000000005951 |                      |                                                                                                |                                   |
| B4              | 39141172        | 39189805      | ENSFCAG0000000005953 | GALNT8               | UDP-N-acetyl-alpha-D-galactosamine:polypeptide N-acetylgalactosaminyltransferase 8 (GalNAc-T8) |                                   |
| B4              | 39221313        | 39222899      | ENSFCAG0000000002340 | KCNA6                | potassium voltage-gated channel, shaker-related subfamily, member 6                            |                                   |
| B4              | 51667745        | 51689061      | ENSFCAG0000000024292 | STRAP                | serine/threonine kinase receptor associated protein                                            |                                   |
| B4              | 51747458        | 51817466      | ENSFCAG0000000012551 | DERA                 | deoxyribose-phosphate aldolase (putative)                                                      |                                   |
| B4              | 83180790        | 83186313      | ENSFCAG0000000010156 |                      |                                                                                                |                                   |
| B4              | 83201595        | 83207215      | ENSFCAG0000000031316 |                      |                                                                                                |                                   |
| B4              | 83212103        | 83250831      | ENSFCAG0000000010157 | NCKAP1L              | NCK-associated protein 1-like                                                                  |                                   |
| B4              | 83256882        | 83284307      | ENSFCAG0000000010158 | PDE1B                | phosphodiesterase 1B, calmodulin-dependent                                                     |                                   |
| B4              | 83285929        | 83289181      | ENSFCAG0000000010159 | PPP1R1A              | protein phosphatase 1, regulatory (inhibitor) subunit 1A                                       |                                   |
| B4              | 85201642        | 85213246      | ENSFCAG0000000012017 | ANKRD52              | ankyrin repeat domain 52                                                                       |                                   |
| B4              | 85212877        | 85212953      | ENSFCAG0000000021736 |                      |                                                                                                |                                   |
| B4              | 85219509        | 85222879      | ENSFCAG0000000012018 | COQ10A               | coenzyme Q10 homolog A (S. cerevisiae)                                                         |                                   |
| B4              | 85223591        | 85251393      | ENSFCAG0000000012019 | CS                   | Citrate synthase                                                                               |                                   |
| B4              | 85256805        | 85258874      | ENSFCAG0000000012020 |                      |                                                                                                |                                   |
| B4              | 85261031        | 85272858      | ENSFCAG0000000012021 | PAN2                 | PAN2 poly(A) specific ribonuclease subunit homolog (S. cerevisiae)                             |                                   |

**Dataset S2.2(c). Genes underlying regions of low  $H_p$  in the pooled domestic cat variant dataset following annotation of 100kb windows that fell below four standard deviations from the mean  $H_p$**

| Chromosome Name | Gene Start (bp) | Gene End (bp) | Ensembl Gene ID    | Associated Gene Name | Description                                                                                | Overlap With $F_{ST}$ List |
|-----------------|-----------------|---------------|--------------------|----------------------|--------------------------------------------------------------------------------------------|----------------------------|
| B4              | 85277282        | 85279111      | ENSFCAG00000012022 | IL23A                | interleukin 23, alpha subunit p19                                                          |                            |
| B4              | 85281059        | 85298979      | ENSFCAG00000012023 | STAT2                | signal transducer and activator of transcription 2, 113kDa                                 |                            |
| B4              | 85300402        | 85302055      | ENSFCAG00000028837 | APOF                 | apolipoprotein F                                                                           |                            |
| B4              | 85313463        | 85330693      | ENSFCAG00000012024 | TIMELESS             | timeless circadian clock                                                                   |                            |
| B4              | 85345392        | 85348942      | ENSFCAG00000012025 | MIP                  | major intrinsic protein of lens fiber                                                      |                            |
| B4              | 85359827        | 85362487      | ENSFCAG00000023005 | SPRYD4               | SPRY domain containing 4                                                                   |                            |
| B4              | 85360205        | 85376232      | ENSFCAG00000012027 | GLS2                 | glutaminase 2 (liver, mitochondrial)                                                       |                            |
| B4              | 85400194        | 85463992      | ENSFCAG00000012028 | RBMS2                | RNA binding motif, single stranded interacting protein 2                                   |                            |
| C1              | 10640571        | 10657545      | ENSFCAG00000011590 | FBLIM1               | filamin binding LIM protein 1                                                              |                            |
| C1              | 10732129        | 10795582      | ENSFCAG00000010165 | SPEN                 | spen homolog, transcriptional regulator (Drosophila)                                       |                            |
| C1              | 10796361        | 10827960      | ENSFCAG00000023421 | ZBTB17               | zinc finger and BTB domain containing 17                                                   |                            |
| C1              | 10837025        | 10839250      | ENSFCAG00000010166 | C1orf64              | chromosome 1 open reading frame 64                                                         |                            |
| C1              | 10848258        | 10852249      | ENSFCAG00000026415 | HSPB7                | heat shock 27kDa protein family, member 7 (cardiovascular)                                 |                            |
| C1              | 58101938        | 58102050      | ENSFCAG00000031207 | 5S_rRNA              | 5S ribosomal RNA                                                                           |                            |
| C1              | 78698661        | 78717765      | ENSFCAG00000031703 | DNTTIP2              | deoxynucleotidyltransferase, terminal, interacting protein 2                               |                            |
| C1              | 78722799        | 78738417      | ENSFCAG00000026377 | GCLM                 | glutamate-cysteine ligase, modifier subunit                                                |                            |
| C1              | 78772870        | 78906672      | ENSFCAG00000015512 | ABCA4                | ATP-binding cassette, sub-family A (ABC1), member 4                                        |                            |
| C1              | 84943030        | 84960266      | ENSFCAG00000011031 | VCAM1                | vascular cell adhesion molecule 1                                                          |                            |
| C1              | 85015454        | 85015558      | ENSFCAG00000025299 | 5S_rRNA              | 5S ribosomal RNA                                                                           |                            |
| C1              | 85064668        | 85071066      | ENSFCAG00000023298 | EXTL2                | exostosins (multiple)-like 2                                                               |                            |
| C1              | 85087065        | 85167096      | ENSFCAG00000011033 | SLC30A7              | solute carrier family 30 (zinc transporter), member 7                                      |                            |
| C1              | 85133519        | 85134071      | ENSFCAG00000028505 |                      |                                                                                            |                            |
| C1              | 85186588        | 85225405      | ENSFCAG00000022542 | DPH5                 | DPH5 homolog (S. cerevisiae)                                                               |                            |
| C1              | 153704054       | 153753962     | ENSFCAG00000004699 | GRB14                | growth factor receptor-bound protein 14                                                    |                            |
| C1              | 154302722       | 154384425     | ENSFCAG00000024761 | SCN3A                | sodium channel, voltage-gated, type III, alpha subunit                                     |                            |
| C1              | 181824781       | 181826420     | ENSFCAG00000010136 |                      |                                                                                            |                            |
| C1              | 181987901       | 182031850     | ENSFCAG00000029020 | SLC39A10             | solute carrier family 39 (zinc transporter), member 10                                     |                            |
| C2              | 77632001        | 77703504      | ENSFCAG00000000693 | ATP13A5              | ATPase type 13A5                                                                           |                            |
| C2              | 77706977        | 77717650      | ENSFCAG00000000692 |                      |                                                                                            |                            |
| C2              | 78412932        | 78673284      | ENSFCAG00000025224 | FGF12                | fibroblast growth factor 12                                                                |                            |
| C2              | 108304270       | 108463279     | ENSFCAG00000012834 | PLCH1                | phospholipase C, eta 1                                                                     |                            |
| C2              | 108510488       | 108510600     | ENSFCAG00000031412 | 5S_rRNA              | 5S ribosomal RNA                                                                           |                            |
| C2              | 128014862       | 128022609     | ENSFCAG00000009596 | RAB6B                | RAB6B, member RAS oncogene family                                                          |                            |
| C2              | 128027632       | 128059443     | ENSFCAG00000026858 | SRPRB                | signal recognition particle receptor, B subunit                                            |                            |
| C2              | 128061749       | 128090487     | ENSFCAG00000009592 | TF                   | transferrin                                                                                |                            |
| C2              | 128112530       | 128155615     | ENSFCAG00000027859 |                      |                                                                                            |                            |
| C2              | 128189988       | 128251128     | ENSFCAG00000005146 | TOPBP1               | topoisomerase (DNA) II binding protein 1                                                   |                            |
| D1              | 1607316         | 1636408       | ENSFCAG00000029835 | DCUN1D5              | DCN1, defective in cullin neddylation 1, domain containing 5 (S. cerevisiae)               |                            |
| D1              | 1651507         | 1992762       | ENSFCAG00000028573 | DYNC2H1              | dynein, cytoplasmic 2, heavy chain 1                                                       |                            |
| D1              | 30227928        | 30233580      | ENSFCAG00000011024 | SPATA19              | spermatogenesis associated 19                                                              |                            |
| D1              | 30287365        | 30324514      | ENSFCAG00000007138 | IGSF9B               | immunoglobulin superfamily, member 9B                                                      |                            |
| D1              | 53604863        | 53604975      | ENSFCAG00000030335 | 5S_rRNA              | 5S ribosomal RNA                                                                           |                            |
| D1              | 107809557       | 107915426     | ENSFCAG00000008866 | UBXN1                | UBX domain protein 1 [Source:HGNC Symbol;Acc:18402]                                        |                            |
| D1              | 107850747       | 107857696     | ENSFCAG00000008861 | MTA2                 | metastasis associated 1 family, member 2                                                   |                            |
| D1              | 107858491       | 107867300     | ENSFCAG00000008862 | EML3                 | echinoderm microtubule associated protein like 3                                           |                            |
| D1              | 107868913       | 107870543     | ENSFCAG00000008863 | ROM1                 | retinal outer segment membrane protein 1                                                   |                            |
| D1              | 107870916       | 107875681     | ENSFCAG00000008864 | B3GAT3               | beta-1,3-glucuronyltransferase 3 (glucuronosyltransferase I)                               |                            |
| D1              | 107876904       | 107892987     | ENSFCAG00000008865 | GANAB                | glucosidase, alpha; neutral AB                                                             |                            |
| D1              | 107889470       | 107890314     | ENSFCAG00000030933 |                      |                                                                                            |                            |
| D1              | 107893127       | 107897937     | ENSFCAG00000022488 | INTS5                | integrator complex subunit 5                                                               |                            |
| D1              | 107901491       | 107905417     | ENSFCAG00000025454 |                      |                                                                                            |                            |
| D1              | 107906121       | 107907032     | ENSFCAG00000019062 | METTL12              | methyltransferase like 12                                                                  |                            |
| D1              | 107910273       | 107910654     | ENSFCAG00000026508 | C11orf83             | chromosome 11 open reading frame 83                                                        |                            |
| D1              | 107918401       | 107919123     | ENSFCAG00000008867 | LRRN4CL              | LRRN4 C-terminal like                                                                      |                            |
| D1              | 107920655       | 107930057     | ENSFCAG00000018428 | BSCL2                | Berardinelli-Seip congenital lipodystrophy 2 (seipin)                                      |                            |
| D1              | 107931091       | 107931596     | ENSFCAG00000006326 |                      |                                                                                            |                            |
| D1              | 107937649       | 107947789     | ENSFCAG00000014766 |                      |                                                                                            |                            |
| D1              | 107948981       | 107954599     | ENSFCAG00000014768 | TTC9C                | tetratricopeptide repeat domain 9C                                                         |                            |
| D1              | 107961224       | 107964011     | ENSFCAG00000027690 | ZBTB3                | zinc finger and BTB domain containing 3                                                    |                            |
| D1              | 107973264       | 107976548     | ENSFCAG00000026072 | POLR2G               | polymerase (RNA) II (DNA directed) polypeptide G                                           |                            |
| D1              | 107984157       | 107992940     | ENSFCAG00000022346 | TAF6L                | TAF6-like RNA polymerase II, p300/CBP-associated factor (PCAF)-associated factor, 65kDa    |                            |
| D1              | 107993688       | 107994689     | ENSFCAG00000014773 | TMEM179B             | transmembrane protein 179B                                                                 |                            |
| D1              | 107995077       | 107996089     | ENSFCAG00000025098 | TMEM223              | transmembrane protein 223                                                                  |                            |
| D1              | 107996609       | 108006783     | ENSFCAG00000014774 | NXF1                 | nuclear RNA export factor 1                                                                |                            |
| D1              | 108008793       | 108027809     | ENSFCAG00000014778 | STX5                 | syntaxin 5                                                                                 |                            |
| D1              | 108029559       | 108035227     | ENSFCAG00000014780 | WDR74                | WD repeat domain 74                                                                        |                            |
| D1              | 108066532       | 108073223     | ENSFCAG00000014781 | SLC3A2               | solute carrier family 3 (activators of dibasic and neutral amino acid transport), member 2 |                            |
| D1              | 108091101       | 108092483     | ENSFCAG0000000336  | CHRM1                | cholinergic receptor, muscarinic 1                                                         |                            |
| D1              | 111390904       | 111406979     | ENSFCAG00000007404 | SYT12                | synaptotagmin XII                                                                          |                            |
| D1              | 111418646       | 111423350     | ENSFCAG00000007405 | RHOD                 | ras homolog family member D                                                                |                            |
| D1              | 111493966       | 111569206     | ENSFCAG00000003383 | KDM2A                | lysine (K)-specific demethylase 2A                                                         |                            |

**Dataset S2.2(d). Genes underlying regions of low  $H_p$  in the pooled domestic cat variant dataset following annotation of 100kb windows that fell below four standard deviations from the mean  $H_p$**

| Chromosome Name | Gene Start (bp) | Gene End (bp) | Ensembl Gene ID     | Associated Gene Name | Description                                                                                       | Overlap With $F_{ST}$ List |
|-----------------|-----------------|---------------|---------------------|----------------------|---------------------------------------------------------------------------------------------------|----------------------------|
| D1              | 111590001       | 111597609     | ENSFCAG00000003386  | ADRBK1               | adrenergic, beta, receptor kinase 1                                                               |                            |
| D1              | 111598900       | 111611310     | ENSFCAG00000003388  | ANKRD13D             | ankyrin repeat domain 13 family, member D                                                         |                            |
| D1              | 111612360       | 111620131     | ENSFCAG00000003389  | SSH3                 | slingshot homolog 3 (Drosophila)                                                                  |                            |
| D1              | 111642857       | 111644862     | ENSFCAG000000026317 | POLD4                | polymerase (DNA-directed), delta 4, accessory subunit                                             |                            |
| D2              | 129076          | 129188        | ENSFCAG000000029175 | 5S_rRNA              | 5S ribosomal RNA                                                                                  |                            |
| D2              | 57260928        | 57261537      | ENSFCAG000000031023 |                      |                                                                                                   |                            |
| D2              | 57304321        | 57346173      | ENSFCAG000000014012 | ENTPD1               | ectonucleoside triphosphate diphosphohydrolase 1                                                  |                            |
| D2              | 57377604        | 57453891      | ENSFCAG000000024547 |                      |                                                                                                   |                            |
| D3              | 16753418        | 16765475      | ENSFCAG000000023496 | UNC119B              | unc-119 homolog B (C. elegans)                                                                    |                            |
| D3              | 16767557        | 16779781      | ENSFCAG00000002402  | ACADS                | acyl-CoA dehydrogenase, C-2 to C-3 short chain                                                    |                            |
| D3              | 16818395        | 16846475      | ENSFCAG000000030187 | SPPL3                | signal peptide peptidase like 3                                                                   |                            |
| D3              | 27486649        | 27511914      | ENSFCAG000000004294 | UFDL                 | ubiquitin fusion degradation 1 like (yeast)                                                       |                            |
| D3              | 27514585        | 27517737      | ENSFCAG000000025374 | C22orf39             | chromosome 22 open reading frame 39                                                               |                            |
| D3              | 27522219        | 27526181      | ENSFCAG00000002752  | MRPL40               | mitochondrial ribosomal protein L40                                                               |                            |
| D3              | 27545550        | 27619849      | ENSFCAG00000002750  | HIRA                 | HIR histone cell cycle regulation defective homolog A (S. cerevisiae)                             |                            |
| D3              | 27661078        | 27763200      | ENSFCAG00000002747  | CLTCL1               | clathrin, heavy chain-like 1                                                                      |                            |
| D3              | 28412397        | 28523536      | ENSFCAG00000006001  | PI4KA                | phosphatidylinositol 4-kinase, catalytic, alpha                                                   |                            |
| D3              | 28460397        | 28469039      | ENSFCAG00000006002  | SERPIND1             | serpin peptidase inhibitor, clade D (heparin cofactor), member 1                                  |                            |
| D3              | 28532228        | 28532992      | ENSFCAG00000003742  |                      |                                                                                                   |                            |
| D3              | 28549103        | 28552706      | ENSFCAG000000023903 | HIC2                 | hypermethylated in cancer 2                                                                       |                            |
| D3              | 28587145        | 28591887      | ENSFCAG00000008005  |                      |                                                                                                   |                            |
| D3              | 28601226        | 28653670      | ENSFCAG00000008008  | UBE2L3               | ubiquitin-conjugating enzyme E2L 3                                                                |                            |
| D3              | 28659840        | 28661374      | ENSFCAG00000008011  | YDJC                 | YdjC homolog (bacterial)                                                                          |                            |
| D3              | 28663783        | 28666362      | ENSFCAG000000027678 | CCDC116              | coiled-coil domain containing 116                                                                 |                            |
| D3              | 28672570        | 28674479      | ENSFCAG00000008014  | SDF2L1               | stromal cell-derived factor 2-like 1                                                              |                            |
| D3              | 28677737        | 28677830      | ENSFCAG000000024408 |                      |                                                                                                   |                            |
| D3              | 28678081        | 28678140      | ENSFCAG000000029099 |                      |                                                                                                   |                            |
| D3              | 28680749        | 28690369      | ENSFCAG000000031033 |                      |                                                                                                   |                            |
| D3              | 28692128        | 28720327      | ENSFCAG00000002622  | PPIL2                | peptidylprolyl isomerase (cyclophilin)-like 2                                                     |                            |
| D3              | 28724636        | 28743087      | ENSFCAG000000028941 | YPEL1                | yippee-like 1 (Drosophila)                                                                        |                            |
| D3              | 28767507        | 28877605      | ENSFCAG000000023435 | MAPK1                | mitogen-activated protein kinase 1                                                                |                            |
| D3              | 28905826        | 28929444      | ENSFCAG00000002630  | PPM1F                | protein phosphatase, Mg <sup>2+</sup> /Mn <sup>2+</sup> dependent, 1F                             |                            |
| D3              | 28941162        | 28961110      | ENSFCAG00000002631  | TOP3B                | topoisomerase (DNA) III beta                                                                      |                            |
| D3              | 29050629        | 29085036      | ENSFCAG000000011848 |                      |                                                                                                   |                            |
| D3              | 29119195        | 29120502      | ENSFCAG000000004058 | VPREB3               | pre-B lymphocyte 3                                                                                |                            |
| D3              | 29124112        | 29125589      | ENSFCAG000000004065 | C22orf15             | chromosome 22 open reading frame 15                                                               |                            |
| D3              | 29126680        | 29128333      | ENSFCAG000000004059 | CHCHD10              | coiled-coil-helix-coiled-coil-helix domain containing 10                                          |                            |
| D3              | 29130819        | 29140423      | ENSFCAG000000015309 | MMP11                | matrix metalloproteinase 11 (stromelysin 3)                                                       |                            |
| D3              | 29141586        | 29176322      | ENSFCAG000000004068 | SMARCB1              | SWI/SNF related, matrix associated, actin dependent regulator of chromatin, subfamily b, member 1 |                            |
| D3              | 29178943        | 29181128      | ENSFCAG000000004069 | DERL3                | derlin 3                                                                                          |                            |
| D3              | 29194518        | 29214625      | ENSFCAG000000004070 |                      |                                                                                                   |                            |
| D3              | 29230481        | 29231130      | ENSFCAG000000004071 | MIF                  | macrophage migration inhibitory factor (glycosylation-inhibiting factor)                          |                            |
| D3              | 32440361        | 32440473      | ENSFCAG000000028017 | 5S_rRNA              | 5S ribosomal RNA                                                                                  |                            |
| D3              | 73217674        | 73955407      | ENSFCAG000000012953 | DCC                  | deleted in colorectal carcinoma                                                                   | X                          |
| E1              | 29838089        | 29850820      | ENSFCAG000000018819 | PRR11                | proline rich 11                                                                                   |                            |
| E1              | 29867217        | 29867300      | ENSFCAG000000022665 |                      |                                                                                                   |                            |
| E1              | 29878598        | 29878667      | ENSFCAG000000023049 |                      |                                                                                                   |                            |
| E1              | 29884263        | 29908906      | ENSFCAG000000022802 |                      |                                                                                                   |                            |
| E1              | 29914732        | 30045189      | ENSFCAG000000013333 | TRIM37               | tripartite motif containing 37                                                                    |                            |
| E2              | 45291420        | 45336043      | ENSFCAG000000003492 | CTCF                 | CCCTC-binding factor (zinc finger protein)                                                        |                            |
| E2              | 45340148        | 45352135      | ENSFCAG000000009279 | RLTPR                | RGD motif, leucine rich repeats, tropomodulin domain and proline-rich containing                  |                            |
| E2              | 45344436        | 45344645      | ENSFCAG000000023723 |                      |                                                                                                   |                            |
| E2              | 45352266        | 45355166      | ENSFCAG000000009280 | ACD                  | adrenocortical dysplasia homolog (mouse)                                                          |                            |
| E2              | 45355872        | 45357527      | ENSFCAG000000009281 | PARD6A               | par-6 partitioning defective 6 homolog alpha (C. elegans)                                         |                            |
| E2              | 45358052        | 45361200      | ENSFCAG000000009282 | ENKD1                | enkurin domain containing 1                                                                       |                            |
| E2              | 45361603        | 45363331      | ENSFCAG000000026033 | C16orf86             | chromosome 16 open reading frame 86                                                               |                            |
| E2              | 45369230        | 45375475      | ENSFCAG000000003493 | GFOD2                | glucose-fructose oxidoreductase domain containing 2                                               |                            |
| E2              | 45408032        | 45469729      | ENSFCAG000000003494 | RANBP10              | ran-binding protein 10                                                                            |                            |
| E2              | 45440127        | 45440219      | ENSFCAG000000029801 |                      |                                                                                                   |                            |
| E2              | 45468767        | 45482371      | ENSFCAG000000012848 | TSNAXIP1             | translin-associated factor X interacting protein 1                                                |                            |
| E2              | 45482659        | 45488605      | ENSFCAG000000012849 | CENPT                | centromere protein T                                                                              |                            |
| E2              | 45492005        | 45492928      | ENSFCAG000000012850 | THAP11               | THAP domain containing 11                                                                         |                            |
| F2              | 78455289        | 78455684      | ENSFCAG000000023697 |                      |                                                                                                   |                            |
| F2              | 78470381        | 78470478      | ENSFCAG000000031046 |                      |                                                                                                   |                            |

## Dataset S2.3(a). Genes underlying regions of high $F_{ST}$ in the pooled domestic cat variant dataset relative to the pooled wildcat variant dataset

| Chromosome Name | Gene Start (bp) | Gene End (bp) | Ensembl Gene ID     | Associated Gene Name | Description                                                                            | Overlap With Low Domestic $H_p$ |
|-----------------|-----------------|---------------|---------------------|----------------------|----------------------------------------------------------------------------------------|---------------------------------|
| A1              | 11398212        | 11455078      | ENSFCAG00000025587  | BRCA2                | breast cancer type 2 susceptibility protein homolog                                    |                                 |
| A1              | 11458331        | 11465570      | ENSFCAG00000024257  | N4BP2L1              | NEDD4 binding protein 2-like 1                                                         |                                 |
| A1              | 11495916        | 11500421      | ENSFCAG00000022569  | N4BP2L2              | NEDD4 binding protein 2-like 2                                                         |                                 |
| A1              | 11500635        | 11566192      | ENSFCAG00000027199  |                      |                                                                                        |                                 |
| A1              | 117311206       | 117312333     | ENSFCAG00000001278  | CD14                 | CD14 molecule                                                                          |                                 |
| A1              | 117316550       | 117322265     | ENSFCAG00000001280  | TMCO6                | transmembrane and coiled-coil domains 6                                                |                                 |
| A1              | 117322928       | 117325000     | ENSFCAG00000001282  | NDUFA2               | NADH dehydrogenase (ubiquinone) 1 alpha subcomplex, 2, 8kDa                            |                                 |
| A1              | 117325316       | 117335480     | ENSFCAG00000001279  | IK                   | IK cytokine, down-regulator of HLA II                                                  |                                 |
| A1              | 117339751       | 117346166     | ENSFCAG000000031277 | WDR55                | WD repeat domain 55                                                                    |                                 |
| A1              | 117344253       | 117346522     | ENSFCAG00000001285  | DND1                 | dead end homolog 1 (zebrafish)                                                         |                                 |
| A1              | 117347249       | 117360519     | ENSFCAG00000001286  | HARS                 | histidyl-tRNA synthetase                                                               |                                 |
| A1              | 117360312       | 117367965     | ENSFCAG00000001288  | HARS2                | histidyl-tRNA synthetase 2, mitochondrial                                              |                                 |
| A1              | 117368560       | 117373405     | ENSFCAG00000001289  | ZMAT2                | zinc finger, matrin-type 2                                                             |                                 |
| A1              | 117462646       | 117535510     | ENSFCAG000000022810 | PCDHA1               | protocadherin alpha 1                                                                  | X                               |
| A1              | 117694636       | 117729173     | ENSFCAG000000013156 | PCDHB4               | protocadherin beta 4                                                                   | X                               |
| A1              | 117745827       | 117769414     | ENSFCAG00000003467  | PCDHB14              | protocadherin beta 14                                                                  |                                 |
| A1              | 117799797       | 117801198     | ENSFCAG000000029398 | SLC25A2              | solute carrier family 25 (mitochondrial carrier; ornithine transporter) member 2       |                                 |
| A1              | 117809591       | 117810640     | ENSFCAG000000025624 | TAF7                 | TAF7 RNA polymerase II, TATA box binding protein (TBP)-associated factor, 55kDa        |                                 |
| A1              | 117822381       | 117986226     | ENSFCAG000000027095 | PCDHGC4              | protocadherin gamma subfamily C, 4                                                     |                                 |
| A1              | 193168465       | 193168577     | ENSFCAG000000026163 | 5S_rRNA              | 5S ribosomal RNA                                                                       | X                               |
| A1              | 193262073       | 193280914     | ENSFCAG000000028091 | MFAP3                | microfibrillar-associated protein 3                                                    | X                               |
| A1              | 193286712       | 193315803     | ENSFCAG000000023708 | FAM114A2             | family with sequence similarity 114, member A2                                         | X                               |
| A1              | 193353906       | 193354042     | ENSFCAG000000030338 |                      |                                                                                        |                                 |
| A1              | 193479446       | 193624866     | ENSFCAG00000005223  | GRIA1                | glutamate receptor, ionotropic, AMPA 1                                                 | X                               |
| A2              | 18272574        | 18306642      | ENSFCAG000000031387 | BSN                  | bassoon presynaptic cytomatrix protein                                                 |                                 |
| A2              | 18315503        | 18324298      | ENSFCAG000000028315 | APEH                 | N-acylaminoacyl-peptide hydrolase                                                      |                                 |
| A2              | 18324835        | 18329543      | ENSFCAG000000025772 | MST1                 | macrophage stimulating 1 (hepatocyte growth factor-like)                               |                                 |
| A2              | 18331960        | 18361039      | ENSFCAG000000022451 | RNF123               | ring finger protein 123                                                                |                                 |
| A2              | 18358000        | 18359547      | ENSFCAG000000010675 | AMIGO3               | adhesion molecule with Ig-like domain 3                                                |                                 |
| A2              | 18361478        | 18363484      | ENSFCAG000000010676 | GMPPB                | GDP-mannose pyrophosphorylase B                                                        |                                 |
| A2              | 18367013        | 18386714      | ENSFCAG000000010677 | IP6K1                | inositol hexakisphosphate kinase 1                                                     |                                 |
| A2              | 18422363        | 18430166      | ENSFCAG000000029853 | CDHR4                | cadherin-related family member 4                                                       |                                 |
| A2              | 18433891        | 18435481      | ENSFCAG000000010679 | FAM212A              | family with sequence similarity 212, member A                                          |                                 |
| A2              | 18435671        | 18444581      | ENSFCAG000000010680 | UBA7                 | ubiquitin-like modifier activating enzyme 7                                            |                                 |
| A2              | 18450943        | 18472637      | ENSFCAG000000010682 | TRAF7                | TRAF interacting protein                                                               |                                 |
| A2              | 18475364        | 18478459      | ENSFCAG000000010683 | CAMKV                | CaM kinase-like vesicle-associated                                                     |                                 |
| A2              | 18489446        | 18493192      | ENSFCAG000000024955 |                      |                                                                                        |                                 |
| A2              | 20299485        | 20562418      | ENSFCAG000000015704 | POC1A                | POC1 centriolar protein homolog A (Chlamydomonas)                                      |                                 |
| A2              | 20524053        | 20596054      | ENSFCAG000000015710 | DNAH1                | dynein, axonemal, heavy chain 1                                                        |                                 |
| A2              | 20596545        | 20605161      | ENSFCAG000000015711 | BAP1                 | BRCA1 associated protein-1 (ubiquitin carboxy-terminal hydrolase)                      |                                 |
| A2              | 20605964        | 20617985      | ENSFCAG000000015712 | PHF7                 | PHD finger protein 7                                                                   |                                 |
| A2              | 20628755        | 20638133      | ENSFCAG000000015713 | SEMA3G               | sema domain, immunoglobulin domain (Ig), short basic domain, secreted, (semaphorin) 3G |                                 |
| A2              | 20643522        | 20646338      | ENSFCAG000000015714 | TNNC1                | troponin C type 1 (slow)                                                               |                                 |
| A2              | 20648138        | 20682140      | ENSFCAG000000015715 | NISCH                | nischarin                                                                              |                                 |
| A2              | 20684301        | 20710994      | ENSFCAG000000015716 | STAB1                | stabilin 1                                                                             |                                 |
| A2              | 56358682        | 56359374      | ENSFCAG000000001739 | DNAJB8               | DnaJ (Hsp40) homolog, subfamily B, member 8                                            |                                 |
| A2              | 56408518        | 56572045      | ENSFCAG000000006153 | EEFSEC               | eukaryotic elongation factor, selenocysteine-tRNA-specific                             |                                 |
| B1              | 104314018       | 104319723     | ENSFCAG000000023700 |                      |                                                                                        |                                 |
| B3              | 562402          | 612682        | ENSFCAG000000010511 | TBC1D2B              | TBC1 domain family, member 2B                                                          |                                 |
| B3              | 614460          | 645400        | ENSFCAG000000019139 | ADAMTS7              | ADAM metalloproteinase with thrombospondin type 1 motif, 7                             |                                 |
| B3              | 692868          | 709793        | ENSFCAG000000012197 |                      |                                                                                        |                                 |
| B3              | 724131          | 733861        | ENSFCAG000000012198 | CTSH                 | cathepsin H                                                                            |                                 |
| B3              | 752155          | 849199        | ENSFCAG000000012199 | RASGRF1              | Ras protein-specific guanine nucleotide-releasing factor 1                             |                                 |
| B3              | 23976933        | 24067525      | ENSFCAG000000027111 | UBE3A                | ubiquitin protein ligase E3A                                                           |                                 |
| B3              | 26496373        | 26600819      | ENSFCAG000000023805 | GABRG3               | gamma-aminobutyric acid (GABA) A receptor, gamma 3                                     |                                 |

## Dataset S2.3(b). Genes underlying regions of high $F_{ST}$ in the pooled domestic cat variant dataset relative to the pooled wildcat variant dataset

| Chromosome Name | Gene Start (bp) | Gene End (bp) | Ensembl Gene ID     | Associated Gene Name | Description                                                                  | Overlap With Low Domestic $H_p$ |
|-----------------|-----------------|---------------|---------------------|----------------------|------------------------------------------------------------------------------|---------------------------------|
| B3              | 31880462        | 31899698      | ENSFCAG00000022033  | RCN2                 | reticulocalbin 2, EF-hand calcium binding domain                             |                                 |
| B3              | 31953456        | 31981469      | ENSFCAG00000010953  | PSTPIP1              | proline-serine-threonine phosphatase interacting protein 1                   |                                 |
| B3              | 31986675        | 32018232      | ENSFCAG00000025746  | TSPAN3               | tetraspanin 3                                                                |                                 |
| B3              | 32061239        | 32135509      | ENSFCAG00000026195  |                      |                                                                              |                                 |
| B3              | 32120379        | 32121889      | ENSFCAG00000031049  |                      |                                                                              |                                 |
| B3              | 32401108        | 32428309      | ENSFCAG00000022539  | HMG20A               | high mobility group 20A                                                      |                                 |
| B3              | 32540693        | 32558379      | ENSFCAG00000013212  | LINGO1               | leucine rich repeat and Ig domain containing 1                               |                                 |
| B3              | 33511989        | 33516370      | ENSFCAG00000000344  | CYP1A2               | Cytochrome P450 1A2                                                          | X                               |
| B3              | 33532067        | 33538470      | ENSFCAG00000002016  | CYP1A1               | Cytochrome P450 1A1                                                          | X                               |
| B3              | 33564717        | 33611587      | ENSFCAG00000002014  | EDC3                 | enhancer of mRNA decapping 3 homolog (S. cerevisiae)                         | X                               |
| B3              | 33611037        | 33628940      | ENSFCAG000000031747 | CLK3                 | CDC-like kinase 3                                                            | X                               |
| B3              | 33648267        | 33702607      | ENSFCAG00000002012  | ARID3B               | AT rich interactive domain 3B (BRIGHT-like)                                  | X                               |
| B3              | 113916112       | 114542162     | ENSFCAG00000013487  | GPHN                 | gephyrin                                                                     |                                 |
| B3              | 114877701       | 114926189     | ENSFCAG00000014084  | PLEKHH1              | pleckstrin homology domain containing, family H (with MyTH4 domain) member 1 | X                               |
| B3              | 114924265       | 114931845     | ENSFCAG00000014087  | PIGH                 | phosphatidylinositol glycan anchor biosynthesis, class H                     |                                 |
| B3              | 114944868       | 114977046     | ENSFCAG00000014088  | ARG2                 | arginase, type II                                                            |                                 |
| B3              | 114976632       | 115008847     | ENSFCAG00000014090  |                      |                                                                              |                                 |
| B3              | 114997195       | 114997263     | ENSFCAG00000021393  |                      |                                                                              |                                 |
| B3              | 115012454       | 115028806     | ENSFCAG00000014091  | RDH11                | retinol dehydrogenase 11 (all-trans/9-cis/11-cis)                            |                                 |
| B3              | 115040768       | 115049236     | ENSFCAG00000014092  | RDH12                | retinol dehydrogenase 12 (all-trans/9-cis/11-cis)                            |                                 |
| B3              | 115064179       | 115135168     | ENSFCAG000000007653 | ZFYVE26              | zinc finger, FYVE domain containing 26                                       |                                 |
| B3              | 115157242       | 115190375     | ENSFCAG000000007657 | RAD51B               | RAD51 homolog B (S. cerevisiae)                                              |                                 |
| B3              | 126320314       | 126713029     | ENSFCAG000000007824 | CEP128               | centrosomal protein 128kDa                                                   |                                 |
| B3              | 126725185       | 126884461     | ENSFCAG00000011083  | TSHR                 | thyrotropin receptor precursor                                               |                                 |
| B4              | 143787880       | 143800787     | ENSFCAG00000011914  | PLXNB2               | plexin B2                                                                    |                                 |
| B4              | 143815714       | 143824099     | ENSFCAG00000011915  | DENND6B              | DENN/MADD domain containing 6B                                               |                                 |
| B4              | 143870997       | 143920737     | ENSFCAG000000004431 | PPP6R2               | protein phosphatase 6, regulatory subunit 2                                  |                                 |
| B4              | 143923211       | 143944516     | ENSFCAG000000004434 | SBF1                 | SET binding factor 1                                                         |                                 |
| B4              | 143955788       | 143956879     | ENSFCAG00000022957  | ADM2                 | adrenomedullin 2                                                             |                                 |
| B4              | 143960792       | 143962760     | ENSFCAG00000013030  | MIOX                 | myo-inositol oxygenase                                                       |                                 |
| B4              | 143974923       | 143979512     | ENSFCAG00000013032  | LMF2                 | lipase maturation factor 2                                                   |                                 |
| B4              | 143979545       | 143979666     | ENSFCAG000000028233 |                      |                                                                              |                                 |
| B4              | 143979850       | 143995006     | ENSFCAG00000013034  | NCAPH2               | non-SMC condensin II complex, subunit H2                                     |                                 |
| B4              | 143992569       | 143993369     | ENSFCAG00000013035  | SCO2                 | SCO2 cytochrome c oxidase assembly protein                                   |                                 |
| B4              | 143998592       | 144000511     | ENSFCAG00000021933  | ODF3B                | outer dense fiber of sperm tails 3B                                          |                                 |
| C1              | 81116342        | 81201784      | ENSFCAG000000027655 | PTBP2                | polypyrimidine tract binding protein 2                                       |                                 |
| C1              | 87218356        | 87218468      | ENSFCAG000000028148 | 5S_rRNA              | 5S ribosomal RNA                                                             |                                 |
| C1              | 87333358        | 87358352      | ENSFCAG000000024312 | RNPC3                | RNA-binding region (RNP1, RRM) containing 3                                  |                                 |
| C1              | 102252296       | 102252706     | ENSFCAG00000029741  | HIST2H3D             | histone cluster 2, H3d                                                       |                                 |
| C1              | 102253768       | 102254160     | ENSFCAG000000026932 |                      |                                                                              |                                 |
| C1              | 102254475       | 102254892     | ENSFCAG000000027797 |                      |                                                                              |                                 |
| C1              | 102288465       | 102288845     | ENSFCAG000000023970 | HIST2H2BE            | histone cluster 2, H2be                                                      |                                 |
| C1              | 102289173       | 102289562     | ENSFCAG000000024806 | HIST2H2AC            | histone cluster 2, H2ac                                                      |                                 |
| C1              | 102289719       | 102290111     | ENSFCAG000000028667 | HIST2H2AB            | histone cluster 2, H2ab                                                      |                                 |
| C1              | 102300828       | 102301241     | ENSFCAG00000010103  | BOLA1                | bolA homolog 1 (E. coli)                                                     |                                 |
| C1              | 102306044       | 102313944     | ENSFCAG00000010104  | SV2A                 | synaptic vesicle glycoprotein 2A                                             |                                 |
| C1              | 102328326       | 102332748     | ENSFCAG00000010106  | SF3B4                | splicing factor 3b, subunit 4, 49kDa                                         |                                 |
| C1              | 102334404       | 102341438     | ENSFCAG00000010108  | MTMR11               | myotubularin related protein 11                                              |                                 |
| C1              | 102347722       | 102369563     | ENSFCAG00000010110  | OTUD7B               | OTU domain containing 7B                                                     |                                 |
| C1              | 103510046       | 103513819     | ENSFCAG000000005568 | RFX5                 | regulatory factor X, 5 (influences HLA class II expression)                  |                                 |
| C1              | 103523531       | 103532221     | ENSFCAG000000001859 | SELENBP1             | selenium binding protein 1                                                   |                                 |
| C1              | 103572933       | 103576251     | ENSFCAG000000001861 | PSMB4                | proteasome (prosome, macropain) subunit, beta type, 4                        |                                 |
| C1              | 103579750       | 103629870     | ENSFCAG000000001864 | POGZ                 | pogo transposable element with ZNF domain                                    |                                 |
| C1              | 103669485       | 103693186     | ENSFCAG000000004072 | CGN                  | cingulin                                                                     |                                 |
| C1              | 103694358       | 103735432     | ENSFCAG000000004073 | TUFT1                | tuftelin 1                                                                   |                                 |
| C1              | 104304676       | 104409375     | ENSFCAG000000022223 | FLG2                 | filaggrin family member 2                                                    |                                 |

## Dataset S2.3(c). Genes underlying regions of high $F_{ST}$ in the pooled domestic cat variant dataset relative to the pooled wildcat variant dataset

| Chromosome Name | Gene Start (bp) | Gene End (bp) | Ensembl Gene ID     | Associated Gene Name | Description                                                                  | Overlap With Low Domestic $H_p$ |
|-----------------|-----------------|---------------|---------------------|----------------------|------------------------------------------------------------------------------|---------------------------------|
| C1              | 104308093       | 104310222     | ENSFCAG00000025915  | HRNR                 | hornerin                                                                     |                                 |
| C1              | 104341706       | 104342582     | ENSFCAG00000028908  | FLG                  | filaggrin                                                                    |                                 |
| C1              | 104478129       | 104480640     | ENSFCAG00000030196  | CRNN                 | cornulin                                                                     |                                 |
| C1              | 142020467       | 142037136     | ENSFCAG00000027956  | TNFAIP6              | tumor necrosis factor, alpha-induced protein 6                               |                                 |
| C1              | 142068033       | 142135438     | ENSFCAG00000029742  | RIF1                 | RAP1 interacting factor homolog (yeast)                                      |                                 |
| C1              | 142149853       | 142362875     | ENSFCAG00000006778  | NEB                  | nebulin                                                                      |                                 |
| D1              | 87552960        | 87615211      | ENSFCAG00000015003  | DCDC1                | doublecortin domain containing 1                                             |                                 |
| D3              | 73217674        | 73955407      | ENSFCAG00000012953  | DCC                  | deleted in colorectal carcinoma                                              | X                               |
| E1              | 2012450         | 2018802       | ENSFCAG00000001360  | ASGR1                | asialoglycoprotein receptor 1                                                |                                 |
| E1              | 2062948         | 2084818       | ENSFCAG00000002824  | DLG4                 | discs, large homolog 4 (Drosophila)                                          |                                 |
| E1              | 2071965         | 2654649       | ENSFCAG00000009629  | CHD3                 | chromodomain helicase DNA binding protein 3                                  |                                 |
| E1              | 2085784         | 2091265       | ENSFCAG00000002826  | ACADVL               | acyl-CoA dehydrogenase, very long chain                                      |                                 |
| E1              | 2089360         | 2089473       | ENSFCAG00000020094  |                      |                                                                              |                                 |
| E1              | 2092041         | 2099011       | ENSFCAG00000024333  | DVL2                 | dishevelled, dsh homolog 2 (Drosophila)                                      |                                 |
| E1              | 2099343         | 2103630       | ENSFCAG00000025727  | PHF23                | PHD finger protein 23                                                        |                                 |
| E1              | 2105175         | 2106741       | ENSFCAG00000030191  | GABARAP              | GABA(A) receptor-associated protein                                          |                                 |
| E1              | 2108629         | 2114091       | ENSFCAG00000018399  | CTDNBP1              | CTD nuclear envelope phosphatase 1                                           |                                 |
| E1              | 2115255         | 2120631       | ENSFCAG00000002827  | ELP5                 | elongator acetyltransferase complex subunit 5                                |                                 |
| E1              | 2121374         | 2122689       | ENSFCAG00000031173  |                      |                                                                              |                                 |
| E1              | 2133863         | 2138934       | ENSFCAG00000003061  | SLC2A4               | solute carrier family 2 (facilitated glucose transporter), member 4          |                                 |
| E1              | 2140924         | 2144812       | ENSFCAG00000018097  | YBX2                 | Y box binding protein 2                                                      |                                 |
| E1              | 2160740         | 2165161       | ENSFCAG00000010886  |                      |                                                                              |                                 |
| E1              | 2166294         | 2168525       | ENSFCAG00000030260  |                      |                                                                              |                                 |
| E1              | 2169030         | 2180923       | ENSFCAG00000010887  |                      |                                                                              |                                 |
| E1              | 2182103         | 2185125       | ENSFCAG00000030827  |                      |                                                                              |                                 |
| E1              | 2186123         | 2197946       | ENSFCAG00000010890  | ACAP1                | ArfGAP with coiled-coil, ankyrin repeat and PH domains 1                     |                                 |
| E1              | 2202287         | 2203655       | ENSFCAG00000010892  | TMEM95               | transmembrane protein 95                                                     |                                 |
| E1              | 2213358         | 2218182       | ENSFCAG00000010893  | TNK1                 | tyrosine kinase, non-receptor, 1                                             |                                 |
| E1              | 2219417         | 2222502       | ENSFCAG00000010894  | PLSCR3               | phospholipid scramblase 3                                                    |                                 |
| E1              | 2239238         | 2240164       | ENSFCAG00000029899  |                      |                                                                              |                                 |
| E1              | 2245191         | 2253571       | ENSFCAG00000031923  | NLGN2                | neuroligin 2                                                                 |                                 |
| E3              | 19523974        | 19531163      | ENSFCAG00000006398  | TRIM72               | tripartite motif containing 72                                               |                                 |
| E3              | 19542074        | 19543165      | ENSFCAG00000002608  | PYCARD               | PYD and CARD domain containing                                               |                                 |
| E3              | 19551867        | 19563123      | ENSFCAG00000027928  | FUS                  | fused in sarcoma                                                             |                                 |
| E3              | 19590723        | 19599388      | ENSFCAG00000002607  | PRSS36               | protease, serine, 36                                                         |                                 |
| E3              | 19602108        | 19605310      | ENSFCAG00000002606  | PRSS8                | protease, serine, 8                                                          |                                 |
| E3              | 19606046        | 19617514      | ENSFCAG00000002605  | KAT8                 | K(lysine) acetyltransferase 8                                                |                                 |
| E3              | 19619822        | 19623515      | ENSFCAG00000002604  | BCKDK                | branched chain ketoacid dehydrogenase kinase                                 |                                 |
| E3              | 19631084        | 19634172      | ENSFCAG00000029684  |                      |                                                                              |                                 |
| E3              | 19635291        | 19640292      | ENSFCAG00000002602  | PRSS53               | protease, serine, 53                                                         |                                 |
| E3              | 19638036        | 19647917      | ENSFCAG00000021918  | ZNF646               | zinc finger protein 646                                                      |                                 |
| E3              | 19656066        | 19658480      | ENSFCAG00000008954  | ZNF668               | zinc finger protein 668                                                      |                                 |
| E3              | 19670742        | 19679273      | ENSFCAG00000030459  | STX4                 | syntaxin 4                                                                   |                                 |
| E3              | 19700268        | 19707021      | ENSFCAG00000002598  | STX1B                | syntaxin 1B                                                                  |                                 |
| E3              | 19710473        | 19714090      | ENSFCAG00000002594  | HSD3B7               | hydroxy-delta-5-steroid dehydrogenase, 3 beta- and steroid delta-isomerase 7 |                                 |
| E3              | 19715271        | 19736956      | ENSFCAG00000002588  | SETD1A               | SET domain containing 1A                                                     |                                 |
| E3              | 19740874        | 19745210      | ENSFCAG000000023192 | ORAI3                | ORAI calcium release-activated calcium modulator 3                           |                                 |
| E3              | 19747142        | 19766168      | ENSFCAG00000002585  | FBXL19               | F-box and leucine-rich repeat protein 19                                     |                                 |



**Dataset S2.4. Summary of genes underlying regions of elevated  $F_{ST}$  and low  $H_p$  in the pooled domestic cats.**

| Genes Underlying Putative Regions of Selection in the Domestic Cat |                         |                     |                 |                                                                              |                   |               |                  |
|--------------------------------------------------------------------|-------------------------|---------------------|-----------------|------------------------------------------------------------------------------|-------------------|---------------|------------------|
| Region                                                             | Chr.Pos                 | Gene ID             | Gene Name       | Description                                                                  | Domestic $Z(H_p)$ | $Z(F_{ST})$   | Wildcat $Z(H_p)$ |
| 1                                                                  | A1:117462646-117535510  | ENSFCAG00000022810  | <b>PCDHA1</b>   | protocadherin alpha 1                                                        | -4.6 to<br>-4.2   | 4.0 to<br>4.5 | -2.6 to<br>-1.5  |
|                                                                    | A1:117694636-117729173  | ENSFCAG00000013156  | <b>PCDHB4</b>   | protocadherin beta 4                                                         |                   |               |                  |
| 2                                                                  | A1:193168465-193168577  | ENSFCAG00000026163  |                 | 5S ribosomal RNA                                                             | -4.4 to<br>-4.1   | 4.5 to<br>5.2 | 0 to<br>0.6      |
|                                                                    | A1:193262073-193280914  | ENSFCAG00000028091  | <b>MFAP3</b>    | microfibrillar-associated protein 3                                          |                   |               |                  |
|                                                                    | A1:193286712-193315803  | ENSFCAG00000023708  | <b>FAM114A2</b> | family with sequence similarity 114, member A2                               |                   |               |                  |
|                                                                    | A1:193479446-193624866  | ENSFCAG00000005223  | <b>GRIA1</b>    | glutamate receptor, ionotropic, AMPA 1                                       |                   |               |                  |
| 3                                                                  | B3: 33511989-33516370   | ENSFCAG00000000344  | <b>CYP1A2</b>   | cytochrome P450 1A2                                                          | -8.9 to<br>-5.6   | 4.7 to<br>5.2 | 0.7 to<br>0.8    |
|                                                                    | B3:33532067-33538470    | ENSFCAG00000002016  | <b>CYP1A1</b>   | cytochrome P450 1A1                                                          |                   |               |                  |
|                                                                    | B3:33564717-33611587    | ENSFCAG00000002014  | <b>EDC3</b>     | enhancer of mRNA decapping 3 homolog                                         |                   |               |                  |
|                                                                    | B3:33611037-33628940    | ENSFCAG000000031747 | <b>CLK3</b>     | CDC-like kinase 3                                                            |                   |               |                  |
|                                                                    | B3:33648267-33702607    | ENSFCAG00000002012  | <b>ARID3B</b>   | AT rich interactive domain 3B (BRIGHT-like)                                  |                   |               |                  |
| 4                                                                  | B3: 114877701-114926189 | ENSFCAG00000014084  | <b>PLEKHH1</b>  | pleckstrin homology domain containing, family H (with MyTH4 domain) member 1 | -4.6              | 4.1           | 0.3              |
| 5                                                                  | D3: 73217674-73955407   | ENSFCAG00000012953  | <b>DCC</b>      | deleted in colorectal carcinoma                                              | -4.3              | 4.2           | -0.8             |

**Dataset S2.5. Pathway enrichment results using all genes underlying regions of elevated  $F_{ST}$  in the pooled domestic cats relative to the pooled wildcats**

| KEGG Pathway                                                                                                                                                                                                                                                                                                                                                                                                                                                                                                                                                                                                | Pathway ID | C    | O  | E    | R     | rawP     | adjP   | Genes                                                                   |
|-------------------------------------------------------------------------------------------------------------------------------------------------------------------------------------------------------------------------------------------------------------------------------------------------------------------------------------------------------------------------------------------------------------------------------------------------------------------------------------------------------------------------------------------------------------------------------------------------------------|------------|------|----|------|-------|----------|--------|-------------------------------------------------------------------------|
| Retinol metabolism                                                                                                                                                                                                                                                                                                                                                                                                                                                                                                                                                                                          | 830        | 64   | 4  | 0.20 | 20.12 | 4.90E-05 | 0.0009 | RDH12, CYP1A1, CYP1A2, RDH11                                            |
| Systemic lupus erythematosus                                                                                                                                                                                                                                                                                                                                                                                                                                                                                                                                                                                | 5322       | 136  | 4  | 0.42 | 9.47  | 0.0009   | 0.0081 | HIST2H3D, HIST2H2BE, HIST2H2AC, HIST2H2AB                               |
| Metabolic pathways                                                                                                                                                                                                                                                                                                                                                                                                                                                                                                                                                                                          | 1100       | 1130 | 10 | 3.51 | 2.85  | 0.0029   | 0.0153 | ARG2, CYP1A1, NDUFA2, CYP1A2, PIGH, GMPPB, RDH12, ACADVL, HSD3B7, RDH11 |
| Homologous recombination                                                                                                                                                                                                                                                                                                                                                                                                                                                                                                                                                                                    | 3440       | 28   | 2  | 0.09 | 22.99 | 0.0034   | 0.0153 | BRCA2, RAD51B                                                           |
| Tryptophan metabolism                                                                                                                                                                                                                                                                                                                                                                                                                                                                                                                                                                                       | 380        | 42   | 2  | 0.13 | 15.33 | 0.0076   | 0.0198 | CYP1A1, CYP1A2                                                          |
| SNARE interactions in vesicular transport                                                                                                                                                                                                                                                                                                                                                                                                                                                                                                                                                                   | 4130       | 36   | 2  | 0.11 | 17.88 | 0.0056   | 0.0198 | STX4, STX1B                                                             |
| Axon guidance                                                                                                                                                                                                                                                                                                                                                                                                                                                                                                                                                                                               | 4360       | 129  | 3  | 0.40 | 7.48  | 0.0077   | 0.0198 | SEMA3G, DCC, PLXNB2                                                     |
| NOD-like receptor signaling pathway                                                                                                                                                                                                                                                                                                                                                                                                                                                                                                                                                                         | 4621       | 58   | 2  | 0.18 | 11.10 | 0.0141   | 0.0317 | PSTPIP1, PYCARD                                                         |
| Aminoacyl-tRNA biosynthesis                                                                                                                                                                                                                                                                                                                                                                                                                                                                                                                                                                                 | 970        | 63   | 2  | 0.20 | 10.22 | 0.0165   | 0.0330 | HARS2, HARS                                                             |
| Metabolism of xenobiotics by cytochrome P450                                                                                                                                                                                                                                                                                                                                                                                                                                                                                                                                                                | 980        | 71   | 2  | 0.22 | 9.07  | 0.0207   | 0.0339 | CYP1A1, CYP1A2                                                          |
| Huntington's disease                                                                                                                                                                                                                                                                                                                                                                                                                                                                                                                                                                                        | 5016       | 183  | 3  | 0.57 | 5.28  | 0.0196   | 0.0339 | DLG4, NDUFA2, DNAH1                                                     |
| <b>Wikipathway</b>                                                                                                                                                                                                                                                                                                                                                                                                                                                                                                                                                                                          |            |      |    |      |       |          |        |                                                                         |
| AhR pathway                                                                                                                                                                                                                                                                                                                                                                                                                                                                                                                                                                                                 | WP2100     | 39   | 3  | 0.12 | 24.76 | 0.0002   | 0.0034 | CYP1A1, FLG, CYP1A2                                                     |
| Tryptophan metabolism                                                                                                                                                                                                                                                                                                                                                                                                                                                                                                                                                                                       | WP465      | 69   | 3  | 0.21 | 13.99 | 0.0013   | 0.0055 | CYP1A1, UBE3A, CYP1A2                                                   |
| Fatty Acid Omega Oxidation                                                                                                                                                                                                                                                                                                                                                                                                                                                                                                                                                                                  | WP206      | 15   | 2  | 0.05 | 42.91 | 0.0010   | 0.0055 | CYP1A1, CYP1A2                                                          |
| mRNA processing                                                                                                                                                                                                                                                                                                                                                                                                                                                                                                                                                                                             | WP411      | 132  | 4  | 0.41 | 9.75  | 0.0008   | 0.0055 | FUS, SF3B4, PTBP2, CLK3                                                 |
| Striated Muscle Contraction                                                                                                                                                                                                                                                                                                                                                                                                                                                                                                                                                                                 | WP383      | 38   | 2  | 0.12 | 16.94 | 0.0063   | 0.016  | TNNC1, NEB                                                              |
| Tamoxifen metabolism                                                                                                                                                                                                                                                                                                                                                                                                                                                                                                                                                                                        | WP691      | 38   | 2  | 0.12 | 16.94 | 0.0063   | 0.016  | CYP1A1, CYP1A2                                                          |
| NOD pathway                                                                                                                                                                                                                                                                                                                                                                                                                                                                                                                                                                                                 | WP1433     | 39   | 2  | 0.12 | 16.50 | 0.0066   | 0.016  | PYCARD, ACAP1                                                           |
| Estrogen metabolism                                                                                                                                                                                                                                                                                                                                                                                                                                                                                                                                                                                         | WP697      | 44   | 2  | 0.14 | 14.63 | 0.0083   | 0.0176 | CYP1A1, CYP1A2                                                          |
| Selenium Metabolism and Selenoproteins                                                                                                                                                                                                                                                                                                                                                                                                                                                                                                                                                                      | WP28       | 49   | 2  | 0.15 | 13.14 | 0.0102   | 0.0193 | SELENBP1, EEFSEC                                                        |
| cytochrome P450                                                                                                                                                                                                                                                                                                                                                                                                                                                                                                                                                                                             | WP43       | 65   | 2  | 0.20 | 9.90  | 0.0175   | 0.027  | CYP1A1, CYP1A2                                                          |
| Proteasome Degradation                                                                                                                                                                                                                                                                                                                                                                                                                                                                                                                                                                                      | WP183      | 65   | 2  | 0.20 | 9.90  | 0.0175   | 0.027  | PSMB4, UBA7                                                             |
| Integrated Pancreatic Cancer Pathway                                                                                                                                                                                                                                                                                                                                                                                                                                                                                                                                                                        | WP2256     | 181  | 3  | 0.56 | 5.33  | 0.0191   | 0.0271 | BRCA2, DCC, MST1                                                        |
| <p>USER DATA &amp; PARAMETERS - N= 137 genes submitted, Genes mapped to unique Entrez Gene IDs: 134, Organism: hsapiens, Id Type: gene_symbol, Ref Set: entrezgene, Significance Level: .05, Statistics Test: Hypergeometric, MTC: BH, Minimum: 2, Enrichment Analyses: KEGG and Wikipathways</p> <p>COLUMN HEADINGS - number of reference genes in the category (C), number of genes in the gene set and also in the category (O), expected number in the category (E), Ratio of enrichment (R), p value from hypergeometric test (rawP), and p value adjusted by the multiple test adjustment (adjP).</p> |            |      |    |      |       |          |        |                                                                         |

## Dataset S2.6. Variant calls per individual breed pools

| Breed            | High Quality SNVs | Breed Specific SNVs (% of Breed Total) | Breed Specific CNVs |
|------------------|-------------------|----------------------------------------|---------------------|
| Abyssinian       | 1,515,266         | 273,261 (18.0)                         | 25,510              |
| Egyptian Mau     | 2,843,666         | 517,787 (18.2)                         | 57,109              |
| Maine Coon       | 5,057,577         | 866,564 (17.1)                         | 16,724              |
| Norwegian Forest | 6,367,368         | 1,483,201 (23.3)                       | 9,339               |
| Birman           | 2,094,270         | 315,732 (15.1)                         | 20,687              |
| Japanese Bobtail | 5,606,127         | 1,140,768 (20.3)                       | 19,921              |
| Turkish Van      | 4,929,273         | 1,008,628 (20.5)                       | 19,241              |
|                  | Mean = 4,059,078  | Mean = 800,849                         | Mean = 24,076       |

## Dataset S2.7. SNPs analyses of *KIT* in the domestic cat

| ID                    | Breed <sup>1</sup> | Type <sup>2</sup> | Exon(E) or intron(I) nucleotide site |      |       |     |     |       |       |      |    |       |      |     |      |     |      |      |     |     |     |      |      |      |  |  |
|-----------------------|--------------------|-------------------|--------------------------------------|------|-------|-----|-----|-------|-------|------|----|-------|------|-----|------|-----|------|------|-----|-----|-----|------|------|------|--|--|
|                       |                    |                   | 10                                   | 281  | 396   | 522 | 531 | -67   | 1035  | 1036 | -5 | 1473  | 1479 | -18 | 1617 | +34 | 2054 | 2325 | -30 | -3  | +37 | 2805 | 2856 | 2862 |  |  |
|                       |                    |                   | E1                                   | E2   | E3    | E3  | E3  | I3    | E6    | E6   | I8 | E9    | E9   | I9  | E10  | I10 | E14  | E16  | I17 | I17 | I18 | E20  | E21  | E21  |  |  |
| Wild-type sequence    |                    |                   | G                                    | A    | G     | T   | C   | A     | G     | C    | T  | G     | G    | G   | T    | G   | G    | C    | T   | C   | T   | T    | A    | C    |  |  |
| 4910                  | PE                 | Black             | G                                    | M    | G     | Y   | C   | A     | G     | C    | T  | G     | G    | R   | C    | G   | G    | Y    | T   | C   | W   | T    | R    | C    |  |  |
| 4406                  | RB                 | Orange            | G                                    | M    | R     | C   | Y   | M     | G     | C    | Y  | G     | G    | G   | W    | R   | G    | Y    | Y   | Y   | A   | Y    | G    | C    |  |  |
| 9299                  | RG                 | Seal pt           | G                                    | A    | G     | K   | C   | M     | S     | M    | T  | G     | G    | G   | C    | R   | G    | C    | Y   | Y   | A   | T    | R    | Y    |  |  |
| 5337                  | PE                 | White             | R                                    | A    | R     | Y   | Y   | M     | G     | C    | Y  | G     | G    | G   | Y    | R   | G    | C    | Y   | Y   | W   | T    | A    | C    |  |  |
| 10630                 | AC                 | Bicolor           | G                                    | M    | G     | Y   | C   | A     | G     | C    | T  | G     | G    | R   | C    | G   | G    | Y    | T   | C   | W   | T    | R    | C    |  |  |
| H1001 <sup>3</sup>    | RB                 | Bicolor           | G                                    | A    | R     | Y   | Y   | A     | G     | C    | T  | G     | G    | G   | Y    | G   | G    | C    | T   | C   | T   | T    | R    | Y    |  |  |
| 5779                  | RG                 | Bicolor           | G                                    | A    | G     | T   | C   | A     | G     | C    | T  | G     | G    | G   | C    | G   | G    | C    | T   | C   | W   | T    | A    | C    |  |  |
| 11555                 | RG                 | Bicolor           | G                                    | A    | G     | T   | C   | A     | G     | C    | T  | G     | G    | R   | C    | G   | R    | C    | T   | C   | W   | T    | A    | C    |  |  |
| 11556                 | RG                 | Bicolor           | G                                    | A    | G     | T   | C   | A     | G     | C    | T  | G     | G    | R   | C    | G   | G    | C    | T   | C   | W   | T    | A    | C    |  |  |
| 10660                 | BI                 | Gloves            | G                                    | C    | G     | C   | C   | A     | C     | A    | T  | G     | G    | A   | T    | G   | G    | C    | T   | C   | A   | T    | R    | T    |  |  |
| 11558                 | RG                 | Mitted            | G                                    | A    | R     | K   | Y   | A     | G     | C    | Y  | G     | G    | G   | Y    | G   | R    | C    | T   | C   | T   | T    | R    | C    |  |  |
| H1174 <sup>3</sup>    | RB                 | Van               | G                                    | A    | G     | T   | C   | A     | G     | C    | T  | G     | G    | G   | C    | G   | G    | C    | T   | C   | T   | T    | A    | C    |  |  |
| 8592                  | RB                 | Van               | G                                    | M    | G     | Y   | C   | M     | S     | M    | Y  | G     | G    | G   | Y    | G   | G    | C    | Y   | Y   | W   | T    | R    | Y    |  |  |
| 11608                 | TV                 | Van               | G                                    | A    | G     | T   | C   | A     | G     | C    | T  | G     | G    | G   | C    | G   | G    | C    | T   | C   | T   | T    | A    | C    |  |  |
| 11618                 | TV                 | Van               | G                                    | A    | R     | Y   | C   | M     | G     | C    | T  | R     | R    | G   | W    | G   | G    | C    | Y   | Y   | W   | T    | R    | C    |  |  |
| NM_001009<br>837.3    | /                  | /                 | G                                    | A    | A     | C   | T   | /     | G     | C    | /  | G     | G    | /   | T    | /   | G    | C    | /   | /   | /   | T    | G    | C    |  |  |
| ENSFCAT0<br>000003113 | AB                 | Cinnamon          | /                                    | A    | G     | T   | C   | A     | G     | C    | T  | G     | G    | G   | T    | G   | G    | C    | T   | C   | T   | T    | A    | C    |  |  |
| Amino Acid change     |                    |                   | A4T                                  | N94T | E345D |     |     | H346N | A491T |      |    | R685K |      |     |      |     |      |      |     |     |     |      |      |      |  |  |

<sup>1</sup>Breed designations: RB = random bred, PE = Persian, RG = Ragdoll, AC = American Curl, BI = Birman, TV = Turkish Van, AB = Abyssinian. <sup>2</sup>Type indicates coloration of the cat, including the white spotting patterns. Some colors have epistasis, for example, dominant white. A cat may be a seal point (pt) or a bicolor, but dominant white will override these colors as melanocytes are absent, preventing the expression of the melanin. Alleles for bicolor and van may be different between breeds and may be additive. Birmans all have "gloves" and are pointed according to breed standards. Mitted Ragdolls may or may not be pointed.

<sup>3</sup>Cats from the WALTHAM pedigree used for the linkage analysis of the *Spotting* locus.

## Dataset S2.8. Frequency of the glove haplotype in cat breed

| Observed Genotypes/Phenotypes |     |               |    |    |       |    |     |           |    |     |         |    |     |                                                       |
|-------------------------------|-----|---------------|----|----|-------|----|-----|-----------|----|-----|---------|----|-----|-------------------------------------------------------|
| Breed                         | No. | Gloves/mitted |    |    | Solid |    |     | Ambiguous |    |     | Unknown |    |     | Frequency<br>C.<br>1035_1036d<br>elinsCA<br>haplotype |
|                               |     | GG            | GN | NN | GG    | GN | NN  | GG        | GN | NN  | GG      | GN | NN  |                                                       |
| Birman                        | 182 | 177           | 3  | 2  | 0     | 0  | 0   | 0         | 0  | 0   | 0       | 0  | 0   | 0.98                                                  |
| Birman outcrosses             | 5   | 0             | 0  | 0  | 0     | 5  | 0   | 0         | 0  | 0   | 0       | 0  | 0   | 0.50                                                  |
| Ragdoll                       | 171 | 1             | 7  | 19 | 0     | 11 | 30  | 0         | 7  | 55  | 0       | 15 | 26  | 0.12                                                  |
| Random Bred                   | 315 | 0             | 0  | 3  | 2     | 15 | 48  | 2         | 10 | 56  | 4       | 22 | 153 | 0.10                                                  |
| American Shorthair            | 11  | 0             | 0  | 0  | 0     | 0  | 5   | 0         | 0  | 1   | 0       | 0  | 5   | 0.00                                                  |
| American Wirehair             | 3   | 0             | 0  | 0  | 0     | 0  | 0   | 0         | 0  | 1   | 0       | 0  | 2   | 0.00                                                  |
| Egyptian Mau                  | 6   | 0             | 0  | 0  | 0     | 1  | 5   | 0         | 0  | 0   | 0       | 0  | 0   | 0.08                                                  |
| Exotic                        | 10  | 0             | 0  | 0  | 0     | 0  | 0   | 0         | 0  | 0   | 0       | 1  | 9   | 0.05                                                  |
| Japanese Bobtail              | 12  | 0             | 0  | 0  | 0     | 0  | 4   | 0         | 0  | 7   | 0       | 0  | 1   | 0.00                                                  |
| Korat                         | 11  | 0             | 0  | 0  | 0     | 0  | 11  | 0         | 0  | 0   | 0       | 0  | 0   | 0.00                                                  |
| Maine Coon                    | 10  | 0             | 0  | 0  | 0     | 2  | 1   | 0         | 0  | 1   | 0       | 0  | 6   | 0.10                                                  |
| Manx                          | 13  | 0             | 0  | 0  | 0     | 1  | 1   | 0         | 4  | 7   | 0       | 0  | 0   | 0.19                                                  |
| Norwegian Forest Cat          | 11  | 0             | 0  | 0  | 0     | 0  | 3   | 0         | 0  | 3   | 0       | 0  | 5   | 0.00                                                  |
| Persian                       | 8   | 0             | 0  | 0  | 0     | 0  | 5   | 0         | 0  | 1   | 0       | 0  | 2   | 0.00                                                  |
| Russian Blue                  | 11  | 0             | 0  | 0  | 0     | 0  | 11  | 0         | 0  | 0   | 0       | 0  | 0   | 0.00                                                  |
| Seychellois                   | 2   | 0             | 2  | 0  | 0     | 0  | 0   | 0         | 0  | 0   | 0       | 0  | 0   | 0.50                                                  |
| Siamese                       | 52  | 0             | 0  | 0  | 0     | 3  | 49  | 0         | 0  | 0   | 0       | 0  | 0   | 0.03                                                  |
| Siberian                      | 20  | 0             | 0  | 0  | 1     | 3  | 2   | 1         | 0  | 12  | 0       | 0  | 1   | 0.17                                                  |
| Singapura                     | 8   | 0             | 0  | 0  | 0     | 0  | 8   | 0         | 0  | 0   | 0       | 0  | 0   | 0.00                                                  |
| Snowshoe                      | 2   | 0             | 0  | 2  | 0     | 0  | 0   | 0         | 0  | 0   | 0       | 0  | 0   | 0.00                                                  |
| Sphynx                        | 14  | 0             | 0  | 0  | 0     | 0  | 0   | 1         | 0  | 2   | 3       | 6  | 2   | 0.50                                                  |
| Turkish Angora                | 14  | 0             | 0  | 0  | 0     | 0  | 0   | 0         | 0  | 12  | 0       | 0  | 2   | 0.00                                                  |
| Turkish Van                   | 20  | 0             | 0  | 0  | 0     | 0  | 1   | 0         | 1  | 17  | 0       | 0  | 1   | 0.02                                                  |
| TOTAL                         | 911 | 178           | 12 | 26 | 3     | 41 | 183 | 4         | 22 | 176 | 7       | 44 | 215 | /                                                     |

G (gloves) implies the c.1035\_1036delinsCA haplotype, the gloves haplotype. N implies the wildtype allele. 1. Gloves/mitted are cats with white feet. 2. Solid implies a cat with no white spotting pattern. 3. Ambiguous implies a cat with a white spotting pattern that is epistatic and may mask the glove pattern, such as bicolor or dominant white. 4. Cats with no phenotypic description available are listed as unknown. 5. Two random bred cats were included from the WALTHAM pedigree.

## Dataset S2.9. Primer sequences and PCR condition for the analysis of feline KIT

| Genomic Primers |                |                       |                                  |                             |                                           |
|-----------------|----------------|-----------------------|----------------------------------|-----------------------------|-------------------------------------------|
| Exon            | Exon Size (bp) | Product Size (bp)     | Forward Primer 5'-3'             | Reverse Primer 5'-3'        | T <sub>m</sub> /[Mg <sup>2+</sup> ]<br>μM |
| 1               | 154            | 173                   | TCTGGGGGCTCGGCTTTGC              | GTCCGCGGCGCTCTCCCAC         | 60/1.75                                   |
| 2               | 270            | 366                   | ATGCTTTATTTGCGCAAGGA             | TCCAAAGCATAGCATGAAAGAA      | 58/2.25                                   |
| 3               | 282            | 395                   | GCAAAGAGAAACGTCGGAGT             | CCCAGAAGAACGCGAGAA          | 58/1.75                                   |
| 4               | 140            | 237                   | AGGCCACCGAATAAGTTGTG             | CGGGCTGTTTTCTTGATCCA        | 58/2.25                                   |
| 5               | 169            | 361                   | GACAGACTTGTCATGATGCTTTATT        | CATTTATAGAGATACGCTTG        | 58/2.25                                   |
| 6               | 190            | 248                   | TTCATTAACATCTTCCCTATGATGAA       | AGGCCCTGGTAAGCCAAG          | 60/2.00                                   |
| 7               | 116            | 245                   | CAGGCCCTTCACAAGTGATT             | CCAACACGAGCCACAACCTTA       | 58/2.25                                   |
| 8               | 115            | 212                   | GGTGAGGTTTTCCAGCAGTC             | GTCCTTCCCTTACGCATGTC        | 58/2.25                                   |
| 9               | 194            | 295                   | CTTCTGGAGTAAATCGGGTTG            | TGACTGATATGGCAGGCAGA        | 60/1.75                                   |
| 10-11           | 107-127        | 394                   | CTGCCAATAGATTGTGATTCC            | AAAGCCCCGGCTTCATAC          | 58/2.25                                   |
| 12-13           | 105-111        | 380                   | ACACCACCACGTGCTCTCT              | TTTAAAAGATAATAAAAGGTAATTTGG | 58/2.25                                   |
| 14              | 151            | 496                   | TTGCCAGCAGTGTCAATAGG             | TTCTGATTTTGTGCCTCGAA        | 58/1.75                                   |
| 15              | 92             | 259                   | CTCCCCTTTTTCCATTTTG              | GCACTGTTATTGGGGGCTAC        | 58/2.25                                   |
| 16              | 128            | 245                   | CCTTGCTTTGAGGTTAATTGCT           | CTCCAAAGTGGGGCTTGG          | 58/1.75                                   |
| 17              | 123            | 263                   | CGAAACACACATCATTGAGAG            | GGGTACTIONGTTTCTTTG         | 60/1.75                                   |
| 18-19           | 112-100        | 456                   | CCTCAGCAGGAGCAATGTCT             | AGGGGAAGCACTATCTGAAGG       | 58/1.75                                   |
| 20              | 106            | 288                   | GCCCTGGAATTTGAGATTGT             | AAAGGTCTTCACCCCAGAG         | 60/2.00                                   |
| 21              | 132            | 159                   | GGTGTAGGGACTGGCATGTAA            | GAACCAAAGAAGAGGGATCG        | 60/1.75                                   |
| 5'UTR           | /              | 185                   | GeneRacer 5' Primer (Invitrogen) | GAGCAGGAGGAGCAGGACG         | 62/1.50                                   |
| Primer name     |                |                       | Allele Specific PCR primers      |                             |                                           |
| KITgloA-VIC     | 168            | GGCATATCCCAAGCCTGACA  | AGGCCCTGGTAAGCCAAG               | 60/1.50                     |                                           |
| KITgloB-FAM     | 168            | GGCATATCCCAAGCCTGAGC  | AGGCCCTGGTAAGCCAAG               | 60/1.50                     |                                           |
| Primer name     |                |                       | Microsatellites primers          |                             |                                           |
| UCDC259b        | 117            | AGACCTTCAGAGTTGCCAGTG | TGTCCTCATTACCGTCCTACC            | 58/2.00                     |                                           |
| UCDC489         | 212            | GCTCTGCTCCAACATTGC    | GGACCATGCTAATCTAATCGAC           | 58/2.00                     |                                           |
| UCDC487         | 158            | CCTCCTCCTCAACAACCTG   | CTTGAAGCATTGTAGCTGGAAC           | 58/2.00                     |                                           |
| UCDC443         | 148            | GCAACTAGCCAGCTCCAG    | ACTCCACTIONGTTGACGATCC           | 58/2.00                     |                                           |

**Dataset S2.10. Pathway enrichment results using all genes underlying regions of low H<sub>p</sub> in the pooled domestic cats**

| KEGG Pathway                                                                                                                                                                                                                                                                                                                                                                                                                                                                                                                                                                                                | Pathway ID | C    | O  | E    | R     | rawP     | adjP     | Genes                                                                                                             |
|-------------------------------------------------------------------------------------------------------------------------------------------------------------------------------------------------------------------------------------------------------------------------------------------------------------------------------------------------------------------------------------------------------------------------------------------------------------------------------------------------------------------------------------------------------------------------------------------------------------|------------|------|----|------|-------|----------|----------|-------------------------------------------------------------------------------------------------------------------|
| Purine metabolism                                                                                                                                                                                                                                                                                                                                                                                                                                                                                                                                                                                           | 230        | 162  | 6  | 0.73 | 8.23  | 9.80E-05 | 0.0023   | PDE5A, ENTPD1, POLR2G, PDE1B, POLD4, PNPT1                                                                        |
| Metabolic pathways                                                                                                                                                                                                                                                                                                                                                                                                                                                                                                                                                                                          | 1100       | 1130 | 16 | 5.08 | 3.15  | 5.84E-05 | 0.0023   | ACADS, GCLM, ATP6V1D, CYP1A1, POLR2G, GLS2, CYP1A2, GALNT8, B3GAT3, CS, PI4KA, PIGU, GALNT10, POLD4, GANAB, EXTL2 |
| Ubiquitin mediated proteolysis                                                                                                                                                                                                                                                                                                                                                                                                                                                                                                                                                                              | 4120       | 135  | 5  | 0.61 | 8.23  | 0.0004   | 0.0061   | TRIM37, UBE2K, ITCH, UBE2L3, PPIL2                                                                                |
| Pyrimidine metabolism                                                                                                                                                                                                                                                                                                                                                                                                                                                                                                                                                                                       | 240        | 99   | 4  | 0.45 | 8.98  | 0.0011   | 0.0126   | ENTPD1, POLR2G, POLD4, PNPT1                                                                                      |
| Axon guidance                                                                                                                                                                                                                                                                                                                                                                                                                                                                                                                                                                                               | 4360       | 129  | 4  | 0.58 | 6.89  | 0.0028   | 0.0222   | SEMA7A, MAPK1, DCC, RHOD                                                                                          |
| Regulation of actin cytoskeleton                                                                                                                                                                                                                                                                                                                                                                                                                                                                                                                                                                            | 4810       | 213  | 5  | 0.96 | 5.22  | 0.0029   | 0.0222   | SSH3, MAPK1, NCKAP1L, CHRM1, FGF12                                                                                |
| RNA degradation                                                                                                                                                                                                                                                                                                                                                                                                                                                                                                                                                                                             | 3018       | 71   | 3  | 0.32 | 9.39  | 0.0041   | 0.0236   | PNPT1, PAN2, EDC3                                                                                                 |
| Long-term potentiation                                                                                                                                                                                                                                                                                                                                                                                                                                                                                                                                                                                      | 4720       | 70   | 3  | 0.31 | 9.53  | 0.0039   | 0.0236   | GRIA1, MAPK1, PPP1R1A                                                                                             |
| Homologous recombination                                                                                                                                                                                                                                                                                                                                                                                                                                                                                                                                                                                    | 3440       | 28   | 2  | 0.13 | 15.88 | 0.0070   | 0.0268   | TOP3B, POLD4                                                                                                      |
| Jak-STAT signaling pathway                                                                                                                                                                                                                                                                                                                                                                                                                                                                                                                                                                                  | 4630       | 155  | 4  | 0.70 | 5.74  | 0.0054   | 0.0268   | IL23A, IL6ST, IL12B, STAT2                                                                                        |
| Protein processing in endoplasmic reticulum                                                                                                                                                                                                                                                                                                                                                                                                                                                                                                                                                                 | 4141       | 165  | 4  | 0.74 | 5.39  | 0.0067   | 0.0268   | EIF2S1, UFD1L, DERL3, GANAB                                                                                       |
| Glycosaminoglycan biosynthesis - heparan sulfate                                                                                                                                                                                                                                                                                                                                                                                                                                                                                                                                                            | 534        | 26   | 2  | 0.12 | 17.10 | 0.0061   | 0.0268   | EXTL2, B3GAT3                                                                                                     |
| Mucin type O-Glycan biosynthesis                                                                                                                                                                                                                                                                                                                                                                                                                                                                                                                                                                            | 512        | 30   | 2  | 0.13 | 14.82 | 0.0081   | 0.0287   | GALNT10, GALNT8                                                                                                   |
| African trypanosomiasis                                                                                                                                                                                                                                                                                                                                                                                                                                                                                                                                                                                     | 5143       | 35   | 2  | 0.16 | 12.70 | 0.0109   | 0.0358   | VCAM1, IL12B                                                                                                      |
| Endocytosis                                                                                                                                                                                                                                                                                                                                                                                                                                                                                                                                                                                                 | 4144       | 201  | 4  | 0.90 | 4.42  | 0.0132   | 0.0405   | PARD6A, ADRBK1, CLTCL1, ITCH                                                                                      |
| Tryptophan metabolism                                                                                                                                                                                                                                                                                                                                                                                                                                                                                                                                                                                       | 380        | 42   | 2  | 0.19 | 10.59 | 0.0154   | 0.0443   | CYP1A1, CYP1A2                                                                                                    |
| <b>Wikipathway</b>                                                                                                                                                                                                                                                                                                                                                                                                                                                                                                                                                                                          |            |      |    |      |       |          |          |                                                                                                                   |
| Adipogenesis                                                                                                                                                                                                                                                                                                                                                                                                                                                                                                                                                                                                | WP236      | 130  | 7  | 0.58 | 11.97 | 2.21E-06 | 7.29E-05 | EBF1, MIF, ASIP, BSCL2, AHR, IL6ST, STAT2                                                                         |
| AhR pathway                                                                                                                                                                                                                                                                                                                                                                                                                                                                                                                                                                                                 | WP2100     | 39   | 3  | 0.18 | 17.10 | 0.0007   | 0.0115   | CYP1A1, CYP1A2, AHR                                                                                               |
| Fatty Acid Omega Oxidation                                                                                                                                                                                                                                                                                                                                                                                                                                                                                                                                                                                  | WP206      | 15   | 2  | 0.07 | 29.64 | 0.002    | 0.022    | CYP1A1, CYP1A2                                                                                                    |
| Integrated Breast Cancer Pathway                                                                                                                                                                                                                                                                                                                                                                                                                                                                                                                                                                            | WP1984     | 68   | 3  | 0.31 | 9.81  | 0.0036   | 0.0297   | MAPK1, AHR, SMEK2                                                                                                 |
| Regulation of Actin Cytoskeleton                                                                                                                                                                                                                                                                                                                                                                                                                                                                                                                                                                            | WP51       | 157  | 4  | 0.71 | 5.66  | 0.0057   | 0.0336   | SSH3, MAPK1, FGF12, CHRM1                                                                                         |
| Physiological and Pathological Hypertrophy of the Heart                                                                                                                                                                                                                                                                                                                                                                                                                                                                                                                                                     | WP1528     | 26   | 2  | 0.12 | 17.10 | 0.0061   | 0.0336   | MAPK1, IL6ST                                                                                                      |
| <p>USER DATA &amp; PARAMETERS - N= 208 genes submitted, Genes mapped to unique Entrez Gene IDs: 194, Organism: hsapiens, Id Type: gene_symbol, Ref Set: entrezgene, Significance Level: .05, Statistics Test: Hypergeometric, MTC: BH, Minimum: 2, Enrichment Analyses: KEGG and Wikipathways</p> <p>COLUMN HEADINGS - number of reference genes in the category (C), number of genes in the gene set and also in the category (O), expected number in the category (E), Ratio of enrichment (R), p value from hypergeometric test (rawP), and p value adjusted by the multiple test adjustment (adjP).</p> |            |      |    |      |       |          |          |                                                                                                                   |

**Dataset S2.11. Pathway enrichment results using genes underlying regions of elevated  $F_{ST}$  in the pooled domestic cats relative to the pooled wildcats and genes underlying regions of low  $H_p$  in the pooled domestic cats**

| KEGG Pathway                                                                                                                                                                                                                                                                                                                                                                                                                                                                                                                                                                                                | Pathway ID | C    | O  | E    | R     | rawP     | adjP   | Genes                                                                                                                                                                      |
|-------------------------------------------------------------------------------------------------------------------------------------------------------------------------------------------------------------------------------------------------------------------------------------------------------------------------------------------------------------------------------------------------------------------------------------------------------------------------------------------------------------------------------------------------------------------------------------------------------------|------------|------|----|------|-------|----------|--------|----------------------------------------------------------------------------------------------------------------------------------------------------------------------------|
| Metabolic pathways                                                                                                                                                                                                                                                                                                                                                                                                                                                                                                                                                                                          | 1100       | 1130 | 24 | 8.33 | 2.88  | 4.40E-06 | 0.0003 | ACADS, ARG2, GCLM, POLR2G, B3GAT3, PIGH, PI4KA, FIGU, HSD3B7, RDH11, ATP6V1D, CYP1A1, NDUFA2, CYP1A2, GLS2, GALNT8, CS, GMPPB, RDH12, GALNT10, ACADVL, POLD4, GANAB, EXTL2 |
| Homologous recombination                                                                                                                                                                                                                                                                                                                                                                                                                                                                                                                                                                                    | 3440       | 28   | 4  | 0.21 | 19.37 | 5.16E-05 | 0.0015 | TOP3B, BRCA2, POLD4, RAD51B                                                                                                                                                |
| Ubiquitin mediated proteolysis                                                                                                                                                                                                                                                                                                                                                                                                                                                                                                                                                                              | 4120       | 135  | 7  | 1    | 7.03  | 6.86E-05 | 0.0015 | UBE3A, TRIM37, UBE2K, UBA7, ITCH, UBE2L3, PPIL2                                                                                                                            |
| Axon guidance                                                                                                                                                                                                                                                                                                                                                                                                                                                                                                                                                                                               | 4360       | 129  | 6  | 0.95 | 6.31  | 0.0004   | 0.0066 | SEMA7A, SEMA3G, MAPK1, DCC, RHOD, PLXNB2                                                                                                                                   |
| Systemic lupus erythematosus                                                                                                                                                                                                                                                                                                                                                                                                                                                                                                                                                                                | 5322       | 136  | 6  | 1    | 5.98  | 0.0005   | 0.0066 | HIST2H3D, HIST2H2BE, HIST3H2BB, HIST2H2AC, HIST2H2AB, HIST3H2A                                                                                                             |
| NOD-like receptor signaling pathway                                                                                                                                                                                                                                                                                                                                                                                                                                                                                                                                                                         | 4621       | 58   | 4  | 0.43 | 9.35  | 0.0009   | 0.0099 | MAPK1, NLRP3, PYCARD, PSTPIP1                                                                                                                                              |
| Purine metabolism                                                                                                                                                                                                                                                                                                                                                                                                                                                                                                                                                                                           | 230        | 162  | 6  | 1.19 | 5.02  | 0.0013   | 0.0107 | PDE5A, ENTPD1, POLR2G, PDE1B, POLD4, PNPT1                                                                                                                                 |
| Retinol metabolism                                                                                                                                                                                                                                                                                                                                                                                                                                                                                                                                                                                          | 830        | 64   | 4  | 0.47 | 8.48  | 0.0013   | 0.0107 | RDH12, CYP1A1, CYP1A2, RDH11                                                                                                                                               |
| SNARE interactions in vesicular transport                                                                                                                                                                                                                                                                                                                                                                                                                                                                                                                                                                   | 4130       | 36   | 3  | 0.27 | 11.30 | 0.0024   | 0.0176 | STX4, STX1B, STX5                                                                                                                                                          |
| Regulation of actin cytoskeleton                                                                                                                                                                                                                                                                                                                                                                                                                                                                                                                                                                            | 4810       | 213  | 6  | 1.57 | 3.82  | 0.0052   | 0.0343 | SSH3, CD14, MAPK1, NCKAP1L, CHRMI, FGF12                                                                                                                                   |
| Pyrimidine metabolism                                                                                                                                                                                                                                                                                                                                                                                                                                                                                                                                                                                       | 240        | 99   | 4  | 0.73 | 5.48  | 0.0063   | 0.0378 | ENTPD1, POLR2G, POLD4, PNPT1                                                                                                                                               |
| <b>Wikipathway</b>                                                                                                                                                                                                                                                                                                                                                                                                                                                                                                                                                                                          |            |      |    |      |       |          |        |                                                                                                                                                                            |
| Adipogenesis                                                                                                                                                                                                                                                                                                                                                                                                                                                                                                                                                                                                | WP236      | 130  | 8  | 0.96 | 8.35  | 5.96E-06 | 0.0003 | EBF1, MIF, BSCL2, SLC2A4, IL6ST, ASIP, AHR, STAT2                                                                                                                          |
| AhR pathway                                                                                                                                                                                                                                                                                                                                                                                                                                                                                                                                                                                                 | WP2100     | 39   | 4  | 0.29 | 13.91 | 0.0002   | 0.0051 | CYP1A1, FLG, CYP1A2, AHR                                                                                                                                                   |
| Integrated Breast Cancer Pathway                                                                                                                                                                                                                                                                                                                                                                                                                                                                                                                                                                            | WP1984     | 68   | 4  | 0.50 | 7.98  | 0.0016   | 0.0255 | BRCA2, MAPK1, AHR, SMEK2                                                                                                                                                   |
| Hypothetical Network for Drug Addiction                                                                                                                                                                                                                                                                                                                                                                                                                                                                                                                                                                     | WP666      | 35   | 3  | 0.26 | 11.62 | 0.0022   | 0.0255 | GRIA1, MAPK1, NISCH                                                                                                                                                        |
| mRNA processing                                                                                                                                                                                                                                                                                                                                                                                                                                                                                                                                                                                             | WP411      | 132  | 5  | 0.97 | 5.14  | 0.003    | 0.0255 | NXF1, FUS, SF3B4, PTBP2, CLK3                                                                                                                                              |
| NOD pathway                                                                                                                                                                                                                                                                                                                                                                                                                                                                                                                                                                                                 | WP1433     | 39   | 3  | 0.29 | 10.43 | 0.003    | 0.0255 | NLRP3, PYCARD, ACAP1                                                                                                                                                       |
| Regulation of Actin Cytoskeleton                                                                                                                                                                                                                                                                                                                                                                                                                                                                                                                                                                            | WP51       | 157  | 5  | 1.16 | 4.32  | 0.0063   | 0.0357 | SSH3, CD14, MAPK1, CHRMI, FGF12                                                                                                                                            |
| Fatty Acid Omega Oxidation                                                                                                                                                                                                                                                                                                                                                                                                                                                                                                                                                                                  | WP206      | 15   | 2  | 0.11 | 18.08 | 0.0053   | 0.0357 | CYP1A1, CYP1A2                                                                                                                                                             |
| Mitochondrial LC-Fatty Acid Beta-Oxidation                                                                                                                                                                                                                                                                                                                                                                                                                                                                                                                                                                  | WP368      | 16   | 2  | 0.12 | 16.95 | 0.0061   | 0.0357 | ACADS, ACADVL                                                                                                                                                              |
| <p>USER DATA &amp; PARAMETERS - N= 345 genes submitted, Genes mapped to unique Entrez Gene IDs: 378, Organism: hsapiens, Id Type: gene_symbol, Ref Set: entrezgene, Significance Level: .05, Statistics Test: Hypergeometric, MTC: BH, Minimum: 2, Enrichment Analyses: KEGG and Wikipathways</p> <p>COLUMN HEADINGS - number of reference genes in the category (C), number of genes in the gene set and also in the category (O), expected number in the category (E), Ratio of enrichment (R), p value from hypergeometric test (rawP), and p value adjusted by the multiple test adjustment (adjP).</p> |            |      |    |      |       |          |        |                                                                                                                                                                            |



**Dataset S2.12(a). Genes underlying regions of high  $F_{ST}$  in the pooled domestic cat X-chromosome variant dataset relative to the pooled wildcat variant dataset**

| Chromosome Name | Gene Start (bp) | Gene End (bp) | Ensembl Gene ID     | Associated Gene Name | Description                                                       | Overlap With Low Domestic $H_p$ |
|-----------------|-----------------|---------------|---------------------|----------------------|-------------------------------------------------------------------|---------------------------------|
| X               | 41887246        | 41908184      | ENSFCAG00000002568  | HDAC6                | histone deacetylase 6                                             |                                 |
| X               | 41911909        | 41912610      | ENSFCAG00000011221  | ERAS                 | ES cell expressed Ras                                             |                                 |
| X               | 41913754        | 41919251      | ENSFCAG00000011223  | PCSK1N               | proprotein convertase subtilisin/kexin type 1 inhibitor           |                                 |
| X               | 41934479        | 41938238      | ENSFCAG00000002569  | TIMM17B              | translocase of inner mitochondrial membrane 17 homolog B (yeast)  |                                 |
| X               | 41938194        | 41942483      | ENSFCAG00000002570  | PQB1                 | polyglutamine binding protein 1                                   |                                 |
| X               | 41942562        | 41951493      | ENSFCAG00000002571  | SLC35A2              | solute carrier family 35 (UDP-galactose transporter), member A2   |                                 |
| X               | 41952709        | 41957926      | ENSFCAG000000022467 | PIM2                 | pim-2 oncogene                                                    |                                 |
| X               | 41961788        | 41988147      | ENSFCAG00000002572  | OTUD5                | OTU domain containing 5                                           |                                 |
| X               | 41991981        | 41998591      | ENSFCAG00000002579  | KCND1                | potassium voltage-gated channel, Shal-related subfamily, member 1 |                                 |
| X               | 42002178        | 42025194      | ENSFCAG00000002573  | GRIP1                | GRIP1 associated protein 1                                        |                                 |
| X               | 42059037        | 42068974      | ENSFCAG00000002574  | TFE3                 | transcription factor binding to IGHM enhancer 3                   |                                 |
| X               | 42086076        | 42092788      | ENSFCAG00000028936  | CCDC120              | coiled-coil domain containing 120                                 |                                 |
| X               | 42093264        | 42096118      | ENSFCAG00000002576  | PRAF2                | PRA1 domain family, member 2                                      |                                 |
| X               | 42096851        | 42101817      | ENSFCAG00000002577  |                      |                                                                   |                                 |
| X               | 42129150        | 42136833      | ENSFCAG00000003818  | GPKOW                | G patch domain and KOW motifs                                     |                                 |
| X               | 42149508        | 42149825      | ENSFCAG00000028597  |                      |                                                                   |                                 |
| X               | 42872212        | 42934297      | ENSFCAG00000015279  | CCNB3                | cyclin B3                                                         | X                               |
| X               | 42969241        | 43078360      | ENSFCAG00000015283  |                      |                                                                   | X                               |
| X               | 46413121        | 46442443      | ENSFCAG00000008699  | GNL3L                | guanine nucleotide binding protein-like 3 (nucleolar)-like        |                                 |
| X               | 46490447        | 46490559      | ENSFCAG00000022607  | 5S_rRNA              | 5S ribosomal RNA                                                  |                                 |
| X               | 49084155        | 49256064      | ENSFCAG00000008079  | ARHGEF9              | Cdc42 guanine nucleotide exchange factor (GEF) 9                  | X                               |
| X               | 49256901        | 49256994      | ENSFCAG00000020519  |                      |                                                                   |                                 |
| X               | 49353869        | 49353981      | ENSFCAG00000030238  | 5S_rRNA              | 5S ribosomal RNA                                                  |                                 |
| X               | 53226451        | 53260915      | ENSFCAG00000030156  | ZC4H2                | zinc finger, C4H2 domain containing                               | X                               |
| X               | 53707791        | 53708303      | ENSFCAG00000022560  |                      |                                                                   | X                               |
| X               | 53752218        | 53752715      | ENSFCAG00000026187  |                      |                                                                   | X                               |
| X               | 53897284        | 53962444      | ENSFCAG00000013821  | MSN                  | moesin                                                            |                                 |
| X               | 53999183        | 53999682      | ENSFCAG00000031039  |                      |                                                                   |                                 |
| X               | 54021127        | 54021234      | ENSFCAG00000030106  | 5S_rRNA              | 5S ribosomal RNA                                                  |                                 |
| X               | 57120311        | 57122215      | ENSFCAG00000013727  | PJA1                 | praja ring finger 1, E3 ubiquitin protein ligase                  |                                 |
| X               | 57461705        | 57487956      | ENSFCAG00000000752  | FAM155B              | family with sequence similarity 155, member B                     | X                               |
| X               | 62121214        | 62344089      | ENSFCAG00000014128  | ZDHHC15              | zinc finger, DHHC-type containing 15                              |                                 |
| X               | 62258432        | 62259126      | ENSFCAG00000030281  |                      |                                                                   |                                 |
| X               | 62407545        | 62409116      | ENSFCAG00000027322  | MAGEE2               | melanoma antigen family E, 2                                      |                                 |
| X               | 62859874        | 62859986      | ENSFCAG00000027539  | 5S_rRNA              | 5S ribosomal RNA                                                  |                                 |
| X               | 62950563        | 62950675      | ENSFCAG00000027233  | 5S_rRNA              | 5S ribosomal RNA                                                  |                                 |
| X               | 62990509        | 62991208      | ENSFCAG00000025177  |                      |                                                                   |                                 |
| X               | 64307801        | 64308823      | ENSFCAG00000024786  | CYSLTR1              | cysteinyl leukotriene receptor 1                                  |                                 |
| X               | 64322586        | 64322696      | ENSFCAG00000024593  | 5S_rRNA              | 5S ribosomal RNA                                                  |                                 |
| X               | 64453218        | 64453330      | ENSFCAG00000022019  | 5S_rRNA              | 5S ribosomal RNA                                                  |                                 |
| X               | 64983078        | 64984100      | ENSFCAG00000012066  | P2RY10               | purinergic receptor P2Y, G-protein coupled, 10                    |                                 |
| X               | 64997854        | 64997966      | ENSFCAG00000027429  | 5S_rRNA              | 5S ribosomal RNA                                                  |                                 |
| X               | 65054928        | 65056011      | ENSFCAG00000022899  |                      |                                                                   |                                 |
| X               | 65077240        | 65077352      | ENSFCAG00000023385  | 5S_rRNA              | 5S ribosomal RNA                                                  |                                 |
| X               | 65091920        | 65092786      | ENSFCAG00000023690  |                      |                                                                   |                                 |
| X               | 65852774        | 65860885      | ENSFCAG00000002301  | TBX22                | T-box 22                                                          |                                 |
| X               | 69515199        | 69515308      | ENSFCAG000000023760 | 5S_rRNA              | 5S ribosomal RNA                                                  |                                 |
| X               | 69533113        | 69538158      | ENSFCAG00000012662  | CYLC1                | cylicin, basic protein of sperm head cytoskeleton 1               |                                 |
| X               | 69578192        | 69578304      | ENSFCAG00000022168  | 5S_rRNA              | 5S ribosomal RNA                                                  |                                 |
| X               | 69687439        | 69829396      | ENSFCAG00000009130  | RPS6KA6              | ribosomal protein S6 kinase, 90kDa, polypeptide 6                 |                                 |
| X               | 70028313        | 70186830      | ENSFCAG00000005781  | HDX                  | highly divergent homeobox                                         |                                 |
| X               | 70466196        | 70466308      | ENSFCAG00000028603  | 5S_rRNA              | 5S ribosomal RNA                                                  |                                 |
| X               | 72446722        | 72446834      | ENSFCAG00000024434  | 5S_rRNA              | 5S ribosomal RNA                                                  |                                 |
| X               | 74987292        | 74987597      | ENSFCAG00000024785  |                      |                                                                   |                                 |
| X               | 76506764        | 76565232      | ENSFCAG00000025687  |                      |                                                                   |                                 |
| X               | 76745486        | 76757291      | ENSFCAG00000031194  |                      |                                                                   |                                 |
| X               | 76768969        | 76774841      | ENSFCAG00000027080  |                      |                                                                   |                                 |
| X               | 76776829        | 76779222      | ENSFCAG00000029591  |                      |                                                                   |                                 |
| X               | 76853016        | 76853919      | ENSFCAG00000028074  |                      |                                                                   |                                 |
| X               | 77857129        | 77857212      | ENSFCAG00000028826  |                      |                                                                   |                                 |
| X               | 77885307        | 77888089      | ENSFCAG00000031149  |                      |                                                                   |                                 |
| X               | 78058091        | 78058203      | ENSFCAG00000024847  | 5S_rRNA              | 5S ribosomal RNA                                                  |                                 |
| X               | 80450058        | 80592747      | ENSFCAG00000013438  | PCDH19               | protocadherin 19                                                  | X                               |
| X               | 80616295        | 80616399      | ENSFCAG00000023489  | 5S_rRNA              | 5S ribosomal RNA                                                  | X                               |
| X               | 80649550        | 80650477      | ENSFCAG00000026700  | ANXA2                | annexin A2                                                        | X                               |
| X               | 80741994        | 80757092      | ENSFCAG00000024939  | TNMD                 | tenomodulin                                                       |                                 |

**Dataset S2.12(b). Genes underlying regions of high  $F_{ST}$  in the pooled domestic cat X-chromosome variant dataset relative to the pooled wildcat variant dataset**

| Chromosome Name | Gene Start (bp) | Gene End (bp) | Ensembl Gene ID    | Associated Gene Name | Description                                                                 | Overlap With Low Domestic $H_p$ |
|-----------------|-----------------|---------------|--------------------|----------------------|-----------------------------------------------------------------------------|---------------------------------|
| X               | 82163945        | 82164473      | ENSFCAG00000023241 |                      |                                                                             | X                               |
| X               | 82185302        | 82186069      | ENSFCAG00000022838 |                      |                                                                             | X                               |
| X               | 82201194        | 82201535      | ENSFCAG00000013057 | BEX5                 | brain expressed, X-linked 5                                                 | X                               |
| X               | 82233303        | 82256641      | ENSFCAG00000013704 |                      |                                                                             | X                               |
| X               | 83182109        | 83182975      | ENSFCAG00000013517 | MORF4L2              | mortality factor 4 like 2                                                   |                                 |
| X               | 83212584        | 83234142      | ENSFCAG00000013518 | GLRA4                | glycine receptor, alpha 4                                                   |                                 |
| X               | 83215743        | 83219091      | ENSFCAG00000028808 | TMEM31               | transmembrane protein 31                                                    |                                 |
| X               | 83280484        | 83296694      | ENSFCAG00000029818 | PLP1                 | proteolipid protein 1                                                       |                                 |
| X               | 83331532        | 83332137      | ENSFCAG00000000424 | RAB9B                | RAB9B, member RAS oncogene family                                           |                                 |
| X               | 83491286        | 83491820      | ENSFCAG00000026463 |                      |                                                                             |                                 |
| X               | 83499961        | 83528634      | ENSFCAG00000006496 | FAM199X              | family with sequence similarity 199, X-linked                               |                                 |
| X               | 83591368        | 83596306      | ENSFCAG00000007095 | ESX1                 | ESX homeobox 1                                                              |                                 |
| X               | 83679272        | 83679384      | ENSFCAG00000025445 | 5S_rRNA              | 5S ribosomal RNA                                                            |                                 |
| X               | 84656031        | 84656372      | ENSFCAG00000024474 |                      |                                                                             |                                 |
| X               | 85860177        | 85861301      | ENSFCAG00000026273 |                      |                                                                             |                                 |
| X               | 85885076        | 85885160      | ENSFCAG00000024140 | 5S_rRNA              | 5S ribosomal RNA                                                            |                                 |
| X               | 103563484       | 103563596     | ENSFCAG00000029982 | 5S_rRNA              | 5S ribosomal RNA                                                            |                                 |
| X               | 103728395       | 103728504     | ENSFCAG00000031724 | 5S_rRNA              | 5S ribosomal RNA                                                            |                                 |
| X               | 105790212       | 105795802     | ENSFCAG00000022024 | APLN                 | apelin                                                                      |                                 |
| X               | 105873179       | 105898315     | ENSFCAG00000008070 | XPNPEP2              | X-prolyl aminopeptidase (aminopeptidase P) 2, membrane-bound                |                                 |
| X               | 105876930       | 105877062     | ENSFCAG00000020596 |                      |                                                                             |                                 |
| X               | 105908858       | 105920969     | ENSFCAG00000005733 | SASH3                | SAM and SH3 domain containing 3                                             |                                 |
| X               | 105928883       | 105963235     | ENSFCAG00000025956 | ZDHHC9               | zinc finger, DHHC-type containing 9                                         |                                 |
| X               | 121763118       | 121818915     | ENSFCAG00000004331 | MAMLD1               | mastermind-like domain containing 1                                         |                                 |
| X               | 121893254       | 121967078     | ENSFCAG00000004332 | MTM1                 | myotubularin 1                                                              |                                 |
| X               | 125095537       | 125102445     | ENSFCAG00000011399 | FAM50A               | family with sequence similarity 50, member A                                |                                 |
| X               | 125116074       | 125128684     | ENSFCAG00000011400 | PLXNA3               | plexin A3                                                                   |                                 |
| X               | 125134531       | 125136460     | ENSFCAG00000029129 | LAGE3                | L antigen family, member 3                                                  |                                 |
| X               | 125140852       | 125143560     | ENSFCAG00000025607 | UBL4A                | ubiquitin-like 4A                                                           |                                 |
| X               | 125144336       | 125145769     | ENSFCAG00000022989 | SLC10A3              | solute carrier family 10 (sodium/bile acid cotransporter family), member 3  |                                 |
| X               | 125152456       | 125159000     | ENSFCAG00000011403 | FAM3A                | family with sequence similarity 3, member A                                 |                                 |
| X               | 125167043       | 125177827     | ENSFCAG00000011404 | G6PD                 | glucose-6-phosphate dehydrogenase                                           |                                 |
| X               | 125182326       | 125199683     | ENSFCAG00000029840 | IKBKG                | inhibitor of kappa light polypeptide gene enhancer in B-cells, kinase gamma |                                 |
| X               | 125244852       | 125245838     | ENSFCAG00000028188 |                      |                                                                             |                                 |

**Dataset S2.13(a). Genes underlying regions of low  $H_p$  in the pooled domestic cat X-chromosome variant dataset following annotation of 100kb windows that fell below 1.5 standard deviations from the mean  $H_p$**

| Chromosome Name | Gene Start (bp) | Gene End (bp) | Ensembl Gene ID     | Associated Gene Name | Description                                                                                 | Overlap With High $F_{ST}$ (>1.5) |
|-----------------|-----------------|---------------|---------------------|----------------------|---------------------------------------------------------------------------------------------|-----------------------------------|
| X               | 21630           | 63492         | ENSFCAG00000025306  |                      |                                                                                             |                                   |
| X               | 69519           | 101606        | ENSFCAG00000015077  | PPP2R3B              | protein phosphatase 2, regulatory subunit B', beta                                          |                                   |
| X               | 193651          | 210731        | ENSFCAG00000010308  |                      |                                                                                             |                                   |
| X               | 216285          | 223908        | ENSFCAG00000013263  |                      |                                                                                             |                                   |
| X               | 258750          | 260256        | ENSFCAG00000022728  |                      |                                                                                             |                                   |
| X               | 297649          | 299085        | ENSFCAG00000029324  |                      |                                                                                             |                                   |
| X               | 788985          | 801017        | ENSFCAG00000030897  | IL3RA                | interleukin 3 receptor, alpha (low affinity)                                                |                                   |
| X               | 802775          | 805108        | ENSFCAG00000001211  | SLC25A6              | solute carrier family 25 (mitochondrial carrier; adenine nucleotide translocator), member 6 |                                   |
| X               | 810005          | 827797        | ENSFCAG00000014304  | ASMTL                | acetylserotonin O-methyltransferase-like                                                    |                                   |
| X               | 832290          | 833503        | ENSFCAG00000029147  |                      |                                                                                             |                                   |
| X               | 832943          | 833542        | ENSFCAG00000025999  |                      |                                                                                             |                                   |
| X               | 836793          | 839803        | ENSFCAG00000031505  | ASMT                 | acetylserotonin O-methyltransferase                                                         |                                   |
| X               | 982130          | 1057940       | ENSFCAG00000025503  |                      |                                                                                             |                                   |
| X               | 1076513         | 1078597       | ENSFCAG00000012522  | ZBED1                | zinc finger, BED-type containing 1                                                          |                                   |
| X               | 2583245         | 2591210       | ENSFCAG00000022434  |                      |                                                                                             |                                   |
| X               | 3110376         | 3385224       | ENSFCAG00000000375  |                      |                                                                                             |                                   |
| X               | 4013126         | 4013238       | ENSFCAG000000024922 | 5S_rRNA              | 5S ribosomal RNA                                                                            |                                   |
| X               | 4042639         | 4093472       | ENSFCAG00000023323  | HDHD1                | haloacid dehalogenase-like hydrolase domain containing 1                                    |                                   |
| X               | 4206218         | 4291197       | ENSFCAG00000024019  | STS                  | steroid sulfatase (microsomal), isozyme S                                                   |                                   |
| X               | 4770564         | 4800388       | ENSFCAG00000004082  | PNPLA4               | patatin-like phospholipase domain containing 4                                              |                                   |
| X               | 5336558         | 5408176       | ENSFCAG00000004854  | KAL1                 | Kallmann syndrome 1 sequence                                                                |                                   |
| X               | 6295756         | 6440915       | ENSFCAG00000011563  | TBL1Y                | transducin (beta)-like 1, Y-linked                                                          |                                   |
| X               | 6470618         | 6495329       | ENSFCAG00000021932  | GPR143               | G protein-coupled receptor 143                                                              |                                   |
| X               | 6513656         | 6514431       | ENSFCAG00000025783  |                      |                                                                                             |                                   |
| X               | 6596578         | 6677533       | ENSFCAG00000011183  | SHROOM2              | shroom family member 2                                                                      |                                   |
| X               | 6690557         | 6691192       | ENSFCAG00000028772  |                      |                                                                                             |                                   |
| X               | 6710553         | 6711562       | ENSFCAG00000022520  |                      |                                                                                             |                                   |
| X               | 6789548         | 6865297       | ENSFCAG00000011192  | WWC3                 | WWC family member 3                                                                         |                                   |
| X               | 6780137         | 6953135       | ENSFCAG00000007631  | CLCN4                | chloride channel, voltage-sensitive 4                                                       |                                   |
| X               | 7112953         | 7216047       | ENSFCAG00000002582  | MID1                 | midline 1 (Opitz/BBB syndrome)                                                              |                                   |
| X               | 7699738         | 7710351       | ENSFCAG00000022393  | HCCS                 | holocytochrome c synthase                                                                   |                                   |
| X               | 7720243         | 7791414       | ENSFCAG00000002122  | ARHGAP6              | Rho GTPase activating protein 6                                                             |                                   |
| X               | 7830735         | 7835138       | ENSFCAG00000023640  | AMELX                | Amelogenin                                                                                  |                                   |
| X               | 8074048         | 8074539       | ENSFCAG00000030523  |                      |                                                                                             |                                   |
| X               | 8099270         | 8099635       | ENSFCAG00000024727  |                      |                                                                                             |                                   |
| X               | 8259014         | 8271418       | ENSFCAG00000002794  | MSL3                 | male-specific lethal 3 homolog (Drosophila)                                                 |                                   |
| X               | 8513291         | 8513384       | ENSFCAG00000017961  |                      |                                                                                             |                                   |
| X               | 9076358         | 9162154       | ENSFCAG00000006682  | FRMPD4               | FERM and PDZ domain containing 4                                                            |                                   |
| X               | 9305798         | 9308923       | ENSFCAG00000027513  | TLR8                 | Toll-like receptor 8                                                                        |                                   |
| X               | 9354701         | 9356802       | ENSFCAG00000022748  |                      |                                                                                             |                                   |
| X               | 9885613         | 9886440       | ENSFCAG00000027185  |                      |                                                                                             |                                   |
| X               | 9931463         | 9964979       | ENSFCAG00000012437  | EGFL6                | EGF-like-domain, multiple 6                                                                 |                                   |
| X               | 9981863         | 9982885       | ENSFCAG00000024286  |                      |                                                                                             |                                   |
| X               | 10023119        | 10023736      | ENSFCAG00000023992  | RAB9A                | RAB9A, member RAS oncogene family                                                           |                                   |
| X               | 10027827        | 10039663      | ENSFCAG00000023912  |                      |                                                                                             |                                   |
| X               | 10039520        | 10081402      | ENSFCAG00000014870  | OFD1                 | oral-facial-digital syndrome 1                                                              |                                   |
| X               | 10103285        | 10143181      | ENSFCAG00000014877  | GPM6B                | glycoprotein M6B                                                                            |                                   |
| X               | 10305715        | 10316101      | ENSFCAG00000014428  | GEMIN8               | gem (nuclear organelle) associated protein 8                                                |                                   |
| X               | 10529330        | 10529398      | ENSFCAG00000025105  |                      |                                                                                             |                                   |
| X               | 10538216        | 10538293      | ENSFCAG00000027438  |                      |                                                                                             |                                   |
| X               | 10784014        | 10784129      | ENSFCAG00000022459  | 5S_rRNA              | 5S ribosomal RNA                                                                            |                                   |
| X               | 10741200        | 10911440      | ENSFCAG00000011448  | GLRA2                | glycine receptor, alpha 2                                                                   |                                   |
| X               | 11018197        | 11033965      | ENSFCAG00000029176  | FANCB                | Fanconi anemia, complementation group B                                                     |                                   |
| X               | 11041578        | 11095832      | ENSFCAG00000022388  | MOSPD2               | motile sperm domain containing 2                                                            |                                   |
| X               | 11187292        | 11187374      | ENSFCAG00000029611  |                      |                                                                                             |                                   |
| X               | 11286501        | 11288251      | ENSFCAG00000031484  | CBX4                 | chromobox homolog 4                                                                         |                                   |
| X               | 11413677        | 11441669      | ENSFCAG00000010484  | ASB9                 | ankyrin repeat and SOCS box containing 9                                                    |                                   |

**Dataset S2.13(b). Genes underlying regions of low  $H_p$  in the pooled domestic cat X-chromosome variant dataset following annotation of 100kb windows that fell below 1.5 standard deviations from the mean  $H_p$**

| Chromosome Name | Gene Start (bp) | Gene End (bp) | Ensembl Gene ID     | Associated Gene Name | Description                                                                       | Overlap With High $F_{ST}$ (>1.5) |
|-----------------|-----------------|---------------|---------------------|----------------------|-----------------------------------------------------------------------------------|-----------------------------------|
| X               | 11450862        | 11475292      | ENSFCAG00000022236  | ASB11                | ankyrin repeat and SOCS box containing 11                                         |                                   |
| X               | 11478140        | 11488483      | ENSFCAG00000010727  | PIGA                 | phosphatidylinositol glycan anchor biosynthesis, class A                          |                                   |
| X               | 11497779        | 11531651      | ENSFCAG00000010485  | FIGF                 | c-fos induced growth factor (vascular endothelial growth factor D)                |                                   |
| X               | 11532692        | 11621888      | ENSFCAG00000010486  | PIR                  | pirin (iron-binding nuclear protein)                                              |                                   |
| X               | 11631474        | 11678324      | ENSFCAG00000010487  | BMX                  | BMX non-receptor tyrosine kinase                                                  |                                   |
| X               | 11681716        | 11720452      | ENSFCAG00000009320  | ACE2                 | Angiotensin-converting enzyme 2 Processed angiotensin-converting enzyme 2         |                                   |
| X               | 11746176        | 11777544      | ENSFCAG00000009328  | TMEM27               | transmembrane protein 27                                                          |                                   |
| X               | 11828552        | 11828664      | ENSFCAG00000029736  | 5S_rRNA              | 5S ribosomal RNA                                                                  |                                   |
| X               | 11788172        | 11901542      | ENSFCAG00000031216  | CA5B                 | carbonic anhydrase VB, mitochondrial                                              |                                   |
| X               | 11906051        | 11933524      | ENSFCAG00000009333  |                      |                                                                                   |                                   |
| X               | 11936136        | 11962265      | ENSFCAG00000024224  | AP1S2                | adaptor-related protein complex 1, sigma 2 subunit                                |                                   |
| X               | 12787190        | 12837643      | ENSFCAG00000006523  | TXLNG                | taxilin gamma                                                                     |                                   |
| X               | 12837168        | 12864998      | ENSFCAG00000028919  | RBBP7                | retinoblastoma binding protein 7                                                  |                                   |
| X               | 12996604        | 13134277      | ENSFCAG00000006527  | REPS2                | RALBP1 associated Eps domain containing 2                                         |                                   |
| X               | 13935586        | 13935741      | ENSFCAG00000018915  |                      |                                                                                   |                                   |
| X               | 14086539        | 14119271      | ENSFCAG00000006437  | BEND2                | BEN domain containing 2                                                           |                                   |
| X               | 14172289        | 14250913      | ENSFCAG00000006438  | SCML2                | sex comb on midleg-like 2 (Drosophila)                                            |                                   |
| X               | 17399416        | 17399526      | ENSFCAG00000017180  | 5S_rRNA              | 5S ribosomal RNA                                                                  |                                   |
| X               | 17175933        | 17401205      | ENSFCAG00000026807  | CNKSR2               | connector enhancer of kinase suppressor of Ras 2                                  |                                   |
| X               | 17833482        | 17848892      | ENSFCAG00000023168  |                      |                                                                                   |                                   |
| X               | 17988539        | 18006475      | ENSFCAG00000023221  |                      |                                                                                   |                                   |
| X               | 18029515        | 18031154      | ENSFCAG00000010060  | ZNF645               | zinc finger protein 645                                                           |                                   |
| X               | 18790237        | 18791979      | ENSFCAG00000013616  | DDX53                | DEAD (Asp-Glu-Ala-Asp) box polypeptide 53                                         |                                   |
| X               | 19109565        | 19159869      | ENSFCAG00000031503  | PTCHD1               | patched domain containing 1                                                       |                                   |
| X               | 19250902        | 19251014      | ENSFCAG00000027204  | 5S_rRNA              | 5S ribosomal RNA                                                                  |                                   |
| X               | 19308144        | 19308597      | ENSFCAG00000031952  |                      |                                                                                   |                                   |
| X               | 19393444        | 19413380      | ENSFCAG00000004028  | PRDX4                | peroxiredoxin 4                                                                   |                                   |
| X               | 19420080        | 19443002      | ENSFCAG00000004030  | ACOT9                | acyl-CoA thioesterase 9                                                           |                                   |
| X               | 19476530        | 19479076      | ENSFCAG00000004032  | SAT1                 | spermidine/spermine N1-acetyltransferase 1                                        |                                   |
| X               | 19912217        | 19915290      | ENSFCAG00000022717  |                      |                                                                                   |                                   |
| X               | 19931048        | 19934125      | ENSFCAG000000026176 |                      |                                                                                   |                                   |
| X               | 20018240        | 20085226      | ENSFCAG00000002134  | PDK3                 | pyruvate dehydrogenase kinase, isozyme 3                                          |                                   |
| X               | 20104464        | 20200081      | ENSFCAG00000002136  | PCYT1B               | phosphate cytidylyltransferase 1, choline, beta                                   |                                   |
| X               | 20249684        | 20553632      | ENSFCAG00000002138  | POLA1                | polymerase (DNA directed), alpha 1, catalytic subunit                             |                                   |
| X               | 20868777        | 20869679      | ENSFCAG00000031841  | FELCATV1R3           | vomer nasal 1 receptor felCatV1R3                                                 |                                   |
| X               | 26713585        | 26713773      | ENSFCAG00000028835  |                      |                                                                                   |                                   |
| X               | 26746658        | 26767210      | ENSFCAG00000022029  |                      |                                                                                   |                                   |
| X               | 26860944        | 26917110      | ENSFCAG00000028265  |                      |                                                                                   |                                   |
| X               | 26971105        | 26971226      | ENSFCAG00000029796  |                      |                                                                                   |                                   |
| X               | 30543947        | 30544592      | ENSFCAG00000030015  |                      |                                                                                   |                                   |
| X               | 30661122        | 30662084      | ENSFCAG00000030986  | MAGEB16              | melanoma antigen family B, 16                                                     |                                   |
| X               | 30790586        | 30849071      | ENSFCAG00000018231  | CXorf22              | chromosome X open reading frame 22                                                |                                   |
| X               | 38356463        | 38359279      | ENSFCAG00000007766  |                      |                                                                                   |                                   |
| X               | 38214551        | 38413159      | ENSFCAG00000007765  | EFHC2                | EF-hand domain (C-terminal) containing 2                                          |                                   |
| X               | 38876657        | 39013854      | ENSFCAG00000009445  | KDM6A                | lysine (K)-specific demethylase 6A                                                |                                   |
| X               | 39054031        | 39099121      | ENSFCAG00000009449  | CXorf36              | chromosome X open reading frame 36                                                |                                   |
| X               | 40057175        | 40084354      | ENSFCAG00000027707  |                      |                                                                                   |                                   |
| X               | 40134846        | 40135831      | ENSFCAG00000025461  | CHST7                | carbohydrate (N-acetylglucosamine 6-O) sulfotransferase 7                         |                                   |
| X               | 40163495        | 40226463      | ENSFCAG00000003541  | SLC9A7               | solute carrier family 9, subfamily A (NHE7, cation proton antiporter 7), member 7 |                                   |
| X               | 41093658        | 41108251      | ENSFCAG00000008192  | ELK1                 | ELK1, member of ETS oncogene family                                               |                                   |
| X               | 41109294        | 41118283      | ENSFCAG00000028638  | UXT                  | ubiquitously-expressed, prefoldin-like chaperone                                  |                                   |
| X               | 41127225        | 41128098      | ENSFCAG00000023763  |                      |                                                                                   |                                   |
| X               | 41165141        | 41169982      | ENSFCAG00000027976  |                      |                                                                                   |                                   |
| X               | 41220128        | 41306403      | ENSFCAG00000022818  | ZNF81                | zinc finger protein 81                                                            |                                   |
| X               | 41320923        | 41321464      | ENSFCAG00000026947  |                      |                                                                                   |                                   |
| X               | 41394530        | 41395849      | ENSFCAG00000030362  |                      |                                                                                   |                                   |
| X               | 41428902        | 41431781      | ENSFCAG00000008528  |                      |                                                                                   |                                   |

**Dataset S2.13(c). Genes underlying regions of low  $H_p$  in the pooled domestic cat X-chromosome variant dataset following annotation of 100kb windows that fell below 1.5 standard deviations from the mean  $H_p$**

| Chromosome Name | Gene Start (bp) | Gene End (bp) | Ensembl Gene ID      | Associated Gene Name | Description                                                                       | Overlap With High $F_{ST}$ (>1.5) |
|-----------------|-----------------|---------------|----------------------|----------------------|-----------------------------------------------------------------------------------|-----------------------------------|
| X               | 41488558        | 41490795      | ENSFCAAG00000027919  |                      |                                                                                   |                                   |
| X               | 42702287        | 42741226      | ENSFCAAG00000008619  | CLCN5                | chloride channel, voltage-sensitive 5                                             |                                   |
| X               | 42750538        | 42750651      | ENSFCAAG00000017254  | 5S_rRNA              | 5S ribosomal RNA                                                                  |                                   |
| X               | 42836383        | 42851018      | ENSFCAAG00000031319  | AKAP4                | A kinase (PRKA) anchor protein 4                                                  |                                   |
| X               | 42872212        | 42934297      | ENSFCAAG00000015279  | CCNB3                | cyclin B3                                                                         | X                                 |
| X               | 42969241        | 43078360      | ENSFCAAG00000015283  |                      |                                                                                   | X                                 |
| X               | 43193426        | 43193530      | ENSFCAAG00000026630  | 5S_rRNA              | 5S ribosomal RNA                                                                  |                                   |
| X               | 48251045        | 48253353      | ENSFCAAG00000005774  |                      |                                                                                   |                                   |
| X               | 48582110        | 48582823      | ENSFCAAG00000003939  | SPIN4                | spindlin family, member 4                                                         |                                   |
| X               | 48716489        | 48717304      | ENSFCAAG00000024136  |                      |                                                                                   |                                   |
| X               | 48773862        | 48773974      | ENSFCAAG00000031522  | 5S_rRNA              | 5S ribosomal RNA                                                                  |                                   |
| X               | 49049755        | 49049858      | ENSFCAAG00000027820  | 5S_rRNA              | 5S ribosomal RNA                                                                  |                                   |
| X               | 49084155        | 49256064      | ENSFCAAG00000008079  | ARHGGEF9             | Cdc42 guanine nucleotide exchange factor (GEF) 9                                  | X                                 |
| X               | 53226451        | 53260915      | ENSFCAAG00000030156  | ZC4H2                | zinc finger, C4H2 domain containing                                               | X                                 |
| X               | 53639070        | 53640170      | ENSFCAAG000000031009 |                      |                                                                                   |                                   |
| X               | 53707791        | 53708303      | ENSFCAAG000000022560 |                      |                                                                                   | X                                 |
| X               | 53752218        | 53752715      | ENSFCAAG000000026187 |                      |                                                                                   | X                                 |
| X               | 57343796        | 57343908      | ENSFCAAG00000030304  | 5S_rRNA              | 5S ribosomal RNA                                                                  |                                   |
| X               | 57461705        | 57487956      | ENSFCAAG00000000752  | FAM155B              | family with sequence similarity 155, member B                                     | X                                 |
| X               | 57631690        | 57632265      | ENSFCAAG00000028821  |                      |                                                                                   |                                   |
| X               | 58391478        | 58449666      | ENSFCAAG00000008636  | DLG3                 | discs, large homolog 3 (Drosophila)                                               |                                   |
| X               | 58465920        | 58707117      | ENSFCAAG00000029781  | TEX11                | testis expressed 11                                                               |                                   |
| X               | 59100432        | 59101007      | ENSFCAAG000000021936 |                      |                                                                                   |                                   |
| X               | 59107833        | 59192395      | ENSFCAAG000000014809 |                      |                                                                                   |                                   |
| X               | 59250509        | 59286633      | ENSFCAAG00000002182  | OGT                  | O-linked N-acetylglucosamine (GlcNAc) transferase                                 |                                   |
| X               | 59802421        | 59806881      | ENSFCAAG00000023693  | CITED1               | Cbp/p300-interacting transactivator, with Glu/Asp-rich carboxy-terminal domain, 1 |                                   |
| X               | 59828592        | 60051076      | ENSFCAAG00000005065  | HDAC8                | histone deacetylase 8                                                             |                                   |
| X               | 60058404        | 60229276      | ENSFCAAG00000007121  | PHKA1                | phosphorylase kinase, alpha 1 (muscle)                                            |                                   |
| X               | 69165483        | 69166568      | ENSFCAAG00000011964  | POU3F4               | POU class 3 homeobox 4                                                            |                                   |
| X               | 73345566        | 73346382      | ENSFCAAG000000023461 |                      |                                                                                   |                                   |
| X               | 73348095        | 73348790      | ENSFCAAG000000030624 |                      |                                                                                   |                                   |
| X               | 73490123        | 73490814      | ENSFCAAG000000026491 |                      |                                                                                   |                                   |
| X               | 75676071        | 75676176      | ENSFCAAG00000022654  | 5S_rRNA              | 5S ribosomal RNA                                                                  |                                   |
| X               | 75747036        | 75747148      | ENSFCAAG00000026298  | 5S_rRNA              | 5S ribosomal RNA                                                                  |                                   |
| X               | 80450058        | 80592747      | ENSFCAAG00000013438  | PCDH19               | protocadherin 19                                                                  | X                                 |
| X               | 80616295        | 80616399      | ENSFCAAG00000023489  | 5S_rRNA              | 5S ribosomal RNA                                                                  | X                                 |
| X               | 80649550        | 80650477      | ENSFCAAG00000026700  | ANXA2                | annexin A2                                                                        | X                                 |
| X               | 82163945        | 82164473      | ENSFCAAG000000023241 |                      |                                                                                   | X                                 |
| X               | 82185302        | 82186069      | ENSFCAAG000000022838 |                      |                                                                                   | X                                 |
| X               | 82201194        | 82201535      | ENSFCAAG00000013057  | BEX5                 | brain expressed, X-linked 5                                                       | X                                 |
| X               | 82233303        | 82256641      | ENSFCAAG00000013704  |                      |                                                                                   | X                                 |
| X               | 82327996        | 82335121      | ENSFCAAG00000010017  |                      |                                                                                   |                                   |

**Dataset S2.14. Summary of genes underlying regions of elevated  $F_{ST}$  and low  $H_p$  along the X-chromosome in domestic cats**

| Genes Underlying Putative Regions of Selection in the Domestic Cat Along the X-Chromosome |                     |                    |                |                                                  |                   |             |                  |
|-------------------------------------------------------------------------------------------|---------------------|--------------------|----------------|--------------------------------------------------|-------------------|-------------|------------------|
| Region                                                                                    | Chr:Pos             | Gene ID            | Gene Name      | Description                                      | Domestic $Z(H_p)$ | $Z(F_{ST})$ | Wildcat $Z(H_p)$ |
| 1                                                                                         | X:42872212-42934297 | ENSFCAG00000015279 | <b>CCNB3</b>   | cyclin B3                                        | -2.4 to           | 1.6 to      | -0.8 to          |
|                                                                                           | X:42969241-43078360 | ENSFCAG00000015283 |                | unknown                                          | -1.7              | 1.7         | 0.6              |
| 2                                                                                         | X:49084155-49256064 | ENSFCAG00000008079 | <b>ARHGEF9</b> | Cdc42 guanine nucleotide exchange factor (GEF) 9 | -2.3              | 1.5         | 0.30             |
| 3                                                                                         | X:53226451-53260915 | ENSFCAG00000030156 | <b>ZC4H2</b>   | zinc finger, C4H2 domain containing              | -2.3 to           | 1.5 to      | 0.2 to           |
|                                                                                           | X:53707791-53708303 | ENSFCAG00000022560 |                | unknown                                          | -1.6              | 1.8         | 0.5              |
|                                                                                           | X:53752218-53752715 | ENSFCAG00000026187 |                | unknown                                          |                   |             |                  |
| 4                                                                                         | X:57461705-57487956 | ENSFCAG00000000752 | <b>FAM155B</b> | family with sequence similarity 155, member B    | -3.1 to<br>-1.5   | 1.5         | -0.8 to<br>0.5   |
| 5                                                                                         | X:80450058-80592747 | ENSFCAG00000013438 | <b>PCDH19</b>  | protocadherin 19                                 | -2.1 to           | 1.60        | 0.3 to           |
|                                                                                           | X:80616295-80616399 | ENSFCAG00000023489 | <b>5S_rRNA</b> | 5S ribosomal RNA                                 | -1.7              |             | 0.6              |
|                                                                                           | X:80649550-80650477 | ENSFCAG00000026700 | <b>ANXA2</b>   | annexin A2                                       |                   |             |                  |
| 6                                                                                         | X:82163945-82164473 | ENSFCAG00000023241 |                | unknown                                          |                   |             |                  |
|                                                                                           | X:82185302-82186069 | ENSFCAG00000022838 |                | unknown                                          |                   |             |                  |
|                                                                                           | X:82201194-82201535 | ENSFCAG00000013057 | <b>BEX5</b>    | brain expressed, X-linked 5                      | -2.1              | 1.7         | 0.6              |
|                                                                                           | X:82233303-82256641 | ENSFCAG00000013704 |                | unknown                                          |                   |             |                  |
